# Supplementary material for: Isothiocyanates (in situ) and sulfonyl chlorides in water for N-functionalization of bicyclic amidines: access to N-alkylated γ-/ω-lactam derivatized thiourea and sulfonamides
Source: Royal Society of Chemistry journal article supplement (doi:10.1039/d3ob01584j), 2023-01-01
Supplement: d3ob01584j1.pdf [file d3ob01584j1.pdf]

## Supporting informations

### **Isothiocyanates (*in-situ*) and sulfonyl chlorides in water for N-functionalization of bicyclic amidines: Access to N-alkylated $\gamma$ -/ $\omega$ -lactam derivatized thiourea and sulfonamides**

**Pankaj Kumar, and Aman Bhalla\***

Email: amanbhalla@pu.ac.in

Department of Chemistry and Centre of Advanced Studies in Chemistry, Panjab University, Chandigarh 160014, UT, India.

| Contents                                                                                                                                                                                    | Page no. |
|---------------------------------------------------------------------------------------------------------------------------------------------------------------------------------------------|----------|
| <b>1. General Information</b>                                                                                                                                                               | 3        |
| <b>2. Optimization details</b>                                                                                                                                                              |          |
| <b>2.1 Synthesis of <math>\beta</math>-isothiocyanato sulfide 4a</b>                                                                                                                        | 3        |
| <b>Table S1: Optimization of KSCN equiv, Iodine equiv, solvent and temperature conditions</b>                                                                                               | 4        |
| <b>2.2 Synthesis of <math>\beta</math>-thiouredo sulfides 7a and 8a</b>                                                                                                                     | 5        |
| <b>Table S2: Optimization of temperature and solvent conditions for <math>\beta</math>-thiouredo sulfide derivatives 7a and 8a</b>                                                          | 5        |
| <b>2.3 One pot synthesis of <math>\beta</math>-thiouredo sulfide derivatives via <i>in-situ</i> trapping of <math>\beta</math>-isothiocyanato sulfides with bicyclic amidines</b>           | 6        |
| <b>Table S3: Optimization for <i>in-situ</i> trapping of <math>\beta</math>-isothiocyano sulfides with bicyclic amidines</b>                                                                | 6        |
| <b>2.4 One pot synthesis of sulfonamide derivatives via electrophilic reaction of sulfonyl chloride with bicyclic amidines</b>                                                              | 7        |
| <b>Table S4: Optimization for sulfonamide derivatives 7a and 8a via electrophilic reaction of sulfonyl chloride with bicyclic amidines</b>                                                  | 7        |
| <b>3. General procedure for synthesis of <math>\beta</math>-isothiocyanato sulfides 4</b>                                                                                                   | 8        |
| <b>4. General procedure for electrophilic reaction of <math>\beta</math>-isothiocyanato sulfides with bicyclic amidines to afford <math>\beta</math>-thiouredo sulfides 7a-7i and 8a-8i</b> | 9        |
| <b>5. General procedure for synthesis of sulphonamide derivatives 10a-10e and 11a-11e</b>                                                                                                   | 17       |

|                                                                                                                                                                                                                |    |
|----------------------------------------------------------------------------------------------------------------------------------------------------------------------------------------------------------------|----|
| <b>6. General procedure for synthesis of aroyl thiourea (14) and amides (15, 16) derivatives with distal cyclic amides functionality.</b>                                                                      | 21 |
| <b>7. Conversion of <math>\beta</math>-thiouredo sulfides to <math>\beta</math>-uredo sulfide derivatives</b>                                                                                                  | 23 |
| <b>Table S5: Evaluation of sulfonyl chloride equivalents, solvent, temperature and reaction time conditions for <math>\beta</math>-thiouredo sulfides to <math>\beta</math>-uredo sulfides transformations</b> | 24 |
| <b>8. One pot approach for <math>\beta</math>-uredo sulfide 17d from <math>\beta</math>-isothiocyanato sulfide 4d</b>                                                                                          | 24 |
| <b>Table S6: Evaluation of solvent and reaction time for <i>in-situ</i> conversion of <math>\beta</math>-thiouredo sulfides to <math>\beta</math>-uredo sulfides</b>                                           | 25 |
| <b>9. General procedure for <math>\beta</math>-uredo sulfides derivatives 17 and 18 from <math>\beta</math>-isothiocyanato sulfides 4</b>                                                                      | 25 |
| <b>10. General procedure for <math>\beta</math>-thiouredo sulfide (7d) mediated transformation of sulfonyl chloride to thiosulfonates</b>                                                                      | 28 |
| <b>11. Mechanistic studies</b>                                                                                                                                                                                 | 30 |
| <b>12. <math>^1\text{H}</math> and <math>^{13}\text{C}</math> NMR Spectra</b>                                                                                                                                  | 32 |
| <b>13. HRMS</b>                                                                                                                                                                                                | 83 |

## 1. General Information

All reagents were used as supplied by commercial sources (Sigma-Aldrich, AVRA and TCI) without any further purification. Hexane and ethyl acetate required for column chromatography were dried using downward distillation assembly. 1, 2-dichloroethane (DCE) was dried by adding Phosphorous Pentoxide ( $P_2O_5$ ) followed by upward distillation. All reactions were carried out in a 15 ml vial with magnetic stirring in an oil bath under open atmospheric conditions.  $^1H$  NMR spectra were recorded in  $CDCl_3$  and  $DMSO-d_6$  with a Bruker Avance NEO 500 NMR spectrometer operating at 500 MHz respectively. Proton-decoupled  $^{13}C$  NMR spectra were also recorded in  $CDCl_3$  and  $DMSO-d_6$  with a Bruker Avance NEO 500 NMR spectrometer operating at 125.77 MHz respectively. Chemical shifts ( $\delta$ ) are reported in parts per million downfield from tetramethylsilane as an internal standard. Coupling constant (J) values are given in hertz (Hz). Multiplicity of the signal is defined as 's' (singlet), 'd' (doublet), 't' (triplet), 'q' (quartet), 'm' (multiplet). High resolution mass spectra (HRMS) were obtained with a Waters Q-TOF Micromass (YB361) spectrometer and XEVO G2-XS Q-TOF using ESI mode. Melting points were recorded in an open capillary sealed at one end using Perfit GSI-MP-3 melting point apparatus and are uncorrected. TLC analyses were performed using F254 aluminum backed plates pre-coated with silica gel containing fluorescent material from Merck followed by their examinations under 254 nm UV lamp. Column chromatography was performed by using Merck 60-120 mesh silica gel.

## 2. Optimization details

### 2.1 Synthesis of $\beta$ -isothiocyanato sulfide **4a**

To a 15 ml vial with a stir bar were added diphenyl disulphide **1a** (22 mg, 0.1 mmol, 0.5 equiv), styrene **2a** (0.24 mmol, 1.2 equiv), potassium thiocyanate and iodine. This was followed with the addition of solvent (1 ml) and the reaction mixture was stirred in open atmosphere at varied temperature. The reaction completion was monitored by TLC. However, based on data obtained the product formation ceased after 12 hr. After completion of reaction the saturated solution of sodium thiosulfate in water was added to the reaction mixture. The compound was extracted with ethyl acetate and dried over anhydrous sodium sulphate followed by filtration. Ethyl acetate was rota-evaporated under vacuum and the product of the reaction,  $\beta$ -isothiocyanato sulfide **4a** was purified using silica gel column chromatography with 2% ethyl acetate/hexane. The product was confirmed by NMR.

**Table S1: Optimization of KSCN equiv, Iodine equiv, solvent and temperature conditions.**

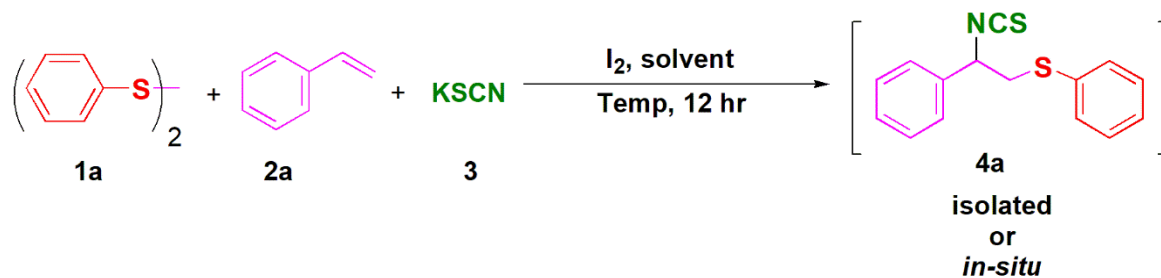

| Sr No | KSCN equiv | I <sub>2</sub> equiv | Temp (°C) | Solvent       | Yield 4a (%) |
|-------|------------|----------------------|-----------|---------------|--------------|
| 1.    | 1.1        | 1                    | 60        | DMSO          | 15           |
| 2.    | 1.1        | 1                    | 55        | DMSO          | trace        |
| 3.    | 1.1        | 1                    | 50        | DMSO          | -            |
| 4.    | 1.1        | 1                    | 65        | DMSO          | trace        |
| 5.    | 1.1        | 1                    | 60        | DMF           | trace        |
| 6.    | 1.1        | 1                    | 60        | Acetonitrile  | 30           |
| 7.    | 1.1        | 1                    | 60        | 1,4-dioxane   | 55           |
| 8.    | 1.1        | 1                    | 60        | Ethyl acetate | 48           |
| 9.    | 1.1        | 1                    | 60        | THF           | 58           |
| 10.   | 1.1        | 1                    | 60        | DCE           | 59           |
| 11.   | 1.1        | 1                    | 60        | Toluene       | 58           |
| 12.   | 1.1        | 1                    | 60        | Ethanol       | trace        |
| 13.   | 1.1        | 1                    | 60        | water         | 81           |
| 14.   | 1.2        | 1                    | 60        | water         | 80           |
| 15.   | 1.5        | 1                    | 60        | water         | 72           |
| 16.   | 1.1        | 0.5                  | 60        | water         | 30           |
| 17.   | 1.1        | 0.2                  | 60        | water         | trace        |
| 18.   | 1.1        | 1                    | 65        | water         | 73           |
| 19.   | 1.1        | 1                    | 55        | water         | 68           |
| 20.   | 1.5        | 1                    | 60        | DCE           | 66           |
| 21.   | 2          | 1                    | 60        | DCE           | 79           |

Diphenyl disulphide **1a** (0.1 mmol, 0.5 equiv), styrene **2a** (1.2 equiv), Reaction time = 12 hr.



## 2.2 Synthesis of $\beta$ -thiouredo sulfides **7a** and **8a**

In a 15 ml vial the mixture of  $\beta$ -isothiocyanato sulfide **4a** (27 mg, 0.1 mmol, 1 equiv) and nucleophile DBN **5** or DBU **6** (0.12 mmol, 1.2 equiv) was added in 1 ml of either water or DCE as solvent. The reaction completion was monitored with TLC. However, after 0.5 hr the reactant spot completely disappear and product formation stops. The reaction mixture was cooled to room temperature and the solvent was rota-evaporated in vacuo. Subsequently, the compound was washed with water and extracted with ethyl acetate. The ethyl acetate layer containing compound was dried over anhydrous  $\text{Na}_2\text{SO}_4$  and filtered, followed by rotary evaporation under vacuo. The reaction product was purified with 60% (DBU as nucleophile) or 70% (DBN as nucleophile) ethyl acetate/hexane solvent using silica gel column chromatography. Finally, the compounds obtained were analysed by NMR and HRMS data.

**Table S2: Optimization of temperature and solvent conditions for  $\beta$ -thiouredo sulfide derivatives **7a** and **8a**.**

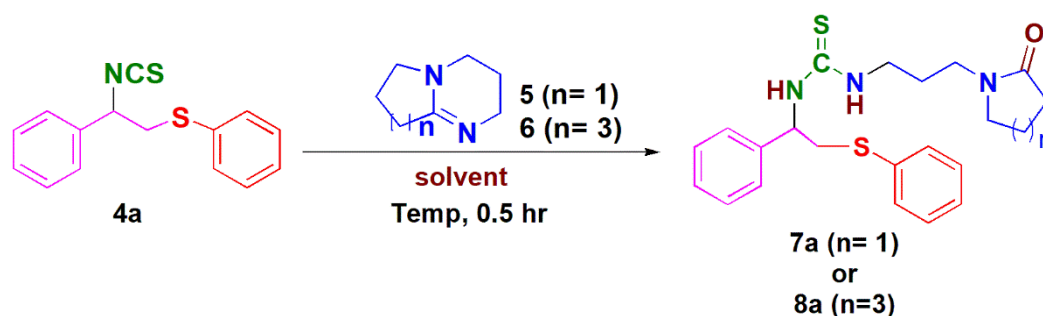

| Sr. No. | Nucleophile (DBN or DBU) | Solvent          | Temp (°C) | %yield (7a or 8a) |
|---------|--------------------------|------------------|-----------|-------------------|
| 1.      | DBN                      | H <sub>2</sub> O | 60        | 7a (91)           |
| 2.      | DBN                      | DCE              | 60        | 7a (88)           |
| 3.      | DBN                      | H <sub>2</sub> O | 55        | 7a (78)           |
| 4.      | DBN                      | H <sub>2</sub> O | 65        | 7a (90)           |
| 5.      | DBN                      | DCE              | 55        | 7a (81)           |
| 6.      | DBN                      | DCE              | 65        | 7a (89)           |
| 7.      | DBU                      | H <sub>2</sub> O | 60        | 8a (94)           |
| 8.      | DBU                      | DCE              | 60        | 8a (90)           |

**4a** (27 mg, 0.1 mmol, 1 equiv) and nucleophile DBN **5** or DBU **6** (0.12 mmol, 1.2 equiv), Reaction time= 0.5 hr.

### 2.3 One pot synthesis of $\beta$ -thiouredo sulfide derivatives via *in-situ* trapping of $\beta$ -isothiocyanato sulfides with bicyclic amidines.

After stirring the reaction mixture for 12 hr to afford  $\beta$ -isothiocyanato sulfide **4a** (as discussed in section 2.1), bicyclic amidines DBN **5** or DBU **6** was added. The reaction mixture was further stirred for another 0.5 hr. After completion the reaction was quenched with saturated solution of sodium thiosulfate in water. The compound was extracted with ethyl acetate and dried over anhydrous  $\text{Na}_2\text{SO}_4$  followed by filtration. Ethyl acetate was rota-evaporated and the compound was purified with 60% (DBU as nucleophile) or 70% (DBN as nucleophile) ethyl acetate/hexane solvent using silica gel column chromatography.

**Table S3: Optimization for *in-situ* trapping of  $\beta$ -isothiocyanato sulfides with bicyclic amidines.**

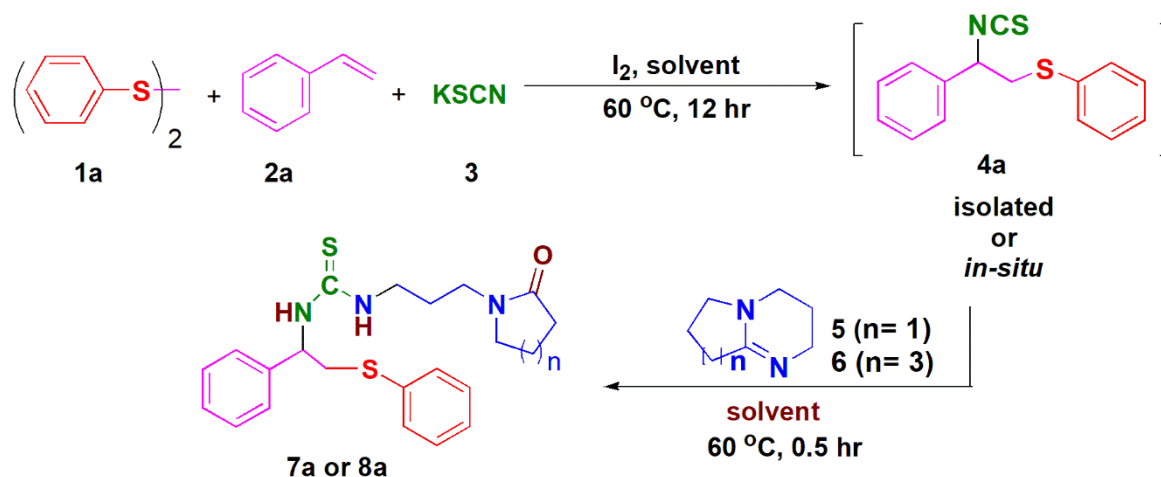

| Sr. No. | Nucleophile equiv (DBN or DBU) | Solvent              | % yield (8a or 9a) |
|---------|--------------------------------|----------------------|--------------------|
| 1.      | 1.2 (DBN)                      | $\text{H}_2\text{O}$ | 30 (7a)            |
| 2.      | 1.2 (DBN)                      | DCE                  | 33 (7a)            |
| 3.      | 1.5 (DBN)                      | $\text{H}_2\text{O}$ | 38 (7a)            |
| 4.      | 2.0 (DBN)                      | $\text{H}_2\text{O}$ | 64 (7a)            |
| 5.      | 2.5 (DBN)                      | $\text{H}_2\text{O}$ | 74 (7a)            |
| 6.      | 3.0 (DBN)                      | $\text{H}_2\text{O}$ | 74 (7a)            |
| 7.      | 2.5 (DBU)                      | $\text{H}_2\text{O}$ | 76 (8a)            |
| 8.      | 2.5 (DBU)                      | DCE                  | 77 (8a)            |

**1a** (0.1 mmol, 0.5 equiv), **2a** (1.2 equiv), **3** (1.1 equiv when  $\text{H}_2\text{O}$  as solvent or 2 equiv when DCE as solvent),  $\text{I}_2$  (0.2 mmol, 1 equiv), Reaction time= 12.5 hr.

## 2.4 One pot synthesis of sulfonamide derivatives via electrophilic reaction of sulfonyl chloride with bicyclic amidines.

To a stirred solution of DBN **5** or DBU **6** in water at various temperature was added sulfonyl chloride **9a** (0.1 mmol, 1 equiv) and continued to stir for 1 hr. After 1 hr the reaction mixture was cooled to room temperature and extracted with ethyl acetate. The organic layer was dried over anhydrous sodium sulphate and filtered. After rotary evaporation of ethyl acetate, the residue was purified using 70% (DBN as nucleophile) or 60% (DBU as nucleophile) ethyl acetate/hexane as mobile phase using silica gel column chromatography.

**Table S4: Optimization for sulfonamide derivatives 7a and 8a via electrophilic reaction of sulfonyl chloride with bicyclic amidines.**

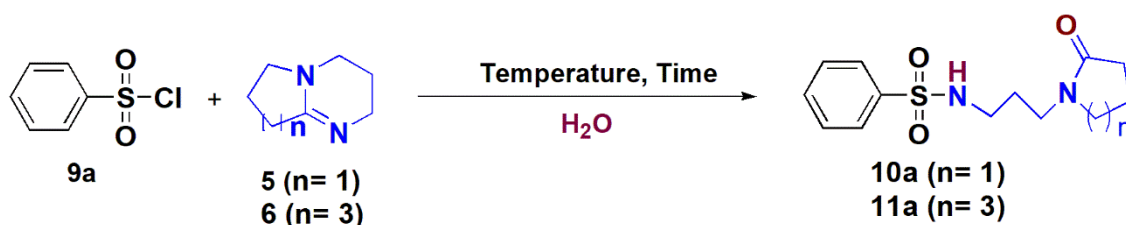

| Sr. No. | Nucleophile equiv (DBN or DBU) | Solvent              | Temperature ( $^{\circ}\text{C}$ ) | Time (hr) | % yield (10a or 11a) |
|---------|--------------------------------|----------------------|------------------------------------|-----------|----------------------|
| 1.      | 2.5 (DBN)                      | $\text{H}_2\text{O}$ | 60                                 | 1         | Trace                |
| 2.      | 2.5 (DBN)                      | $\text{H}_2\text{O}$ | 65                                 | 1         | 28 (10a)             |
| 3.      | 2.5 (DBN)                      | $\text{H}_2\text{O}$ | 70                                 | 1         | 86 (10a)             |
| 4.      | 2.5 (DBN)                      | $\text{H}_2\text{O}$ | 75                                 | 1         | 85 (10a)             |
| 5.      | 2.5 (DBU)                      | $\text{H}_2\text{O}$ | 70                                 | 1         | 88 (11a)             |
| 6.      | 2.0 (DBN)                      | $\text{H}_2\text{O}$ | 70                                 | 1         | 86 (10a)             |
| 7.      | 2.0 (DBU)                      | $\text{H}_2\text{O}$ | 70                                 | 1         | 88 (11a)             |
| 8.      | 1.75 (DBN)                     | $\text{H}_2\text{O}$ | 70                                 | 1         | 72 (10a)             |
| 9.      | 2.0 (DBN)                      | $\text{H}_2\text{O}$ | 70                                 | 1.5       | 86(10a)              |
| 10.     | 2.0 (DBN)                      | $\text{H}_2\text{O}$ | 70                                 | 0.8       | 76(10a)              |

**1a** (0.1 mmol, 1 equiv)

### 3. General procedure for synthesis of $\beta$ -isothiocyanato sulfides 4.

In a 15 ml vial with a stir bar were added disulphide **1** (0.1 mmol, 0.5 equiv), alkene source **2** (0.24 mmol, 1.2 equiv), potassium thiocyanate **3** (0.22 mmol, 1.1 equiv) and iodine (0.2 mmol,

1 equiv) followed by the addition of water (1 ml). The reaction mixture was stirred for 12 hr at 60 °C. After completion of reaction the saturated solution of sodium thiosulfate in water was added to the reaction mixture. The compound was extracted with ethyl acetate and dried over anhydrous sodium sulphate. After filtration ethyl acetate was rota-evaporated under vacuum and synthesized  $\beta$ -isothiocyanato sulfides **4** were purified using silica gel column chromatography with 2% ethyl acetate/hexane. The synthesized derivatives were characterized with  $^1\text{H NMR}$  and  $^{13}\text{C NMR}$  spectroscopy, and that were further confirmed from earlier literature.<sup>1</sup>

#### 1-(2-isothiocyanato-2-phenylethylthio)benzene (4a):

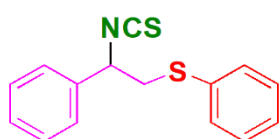

Yellow oil (44 mg, 81%).  $^1\text{H NMR}$  (500 MHz,  $\text{CDCl}_3$ )  $\delta$  7.44 – 7.41 (m, 2H), 7.39 – 7.31 (m, 5H), 7.28 – 7.26 (m, 3H), 4.82 (dd,  $J = 7.8, 6.0$  Hz, 1H), 3.34 – 3.32 (m, 2H).  $^{13}\text{C NMR}$  (126 MHz,  $\text{CDCl}_3$ )  $\delta$  137.63, 135.02, 134.21, 131.15, 129.33, 128.99, 128.76, 127.39, 126.12, 61.06, 43.44.

#### 1-(2-(4-chlorophenyl)-2-isothiocyanatoethylthio)benzene (4c):

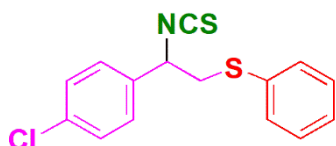

Yellow oil (45 mg, 74%).  $^1\text{H NMR}$  (500 MHz,  $\text{CDCl}_3$ )  $\delta$  7.39 – 7.32 (m, 5H), 7.30 – 7.25 (m, 4H), 4.81 (dd,  $J = 7.4, 6.2$  Hz, 1H), 3.31 – 3.29 (m, 2H).  $^{13}\text{C NMR}$  (126 MHz,  $\text{CDCl}_3$ )  $\delta$  137.44, 135.30, 133.59, 132.76, 132.56, 129.47, 129.04, 128.85, 126.10, 61.09, 43.66.

#### 1-(2-isothiocyanato-2-phenylethylthio)-4-methylbenzene (4d):

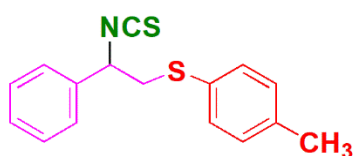

Yellow oil (47 mg, 83%).  $^1\text{H NMR}$  (500 MHz,  $\text{CDCl}_3$ )  $\delta$  7.38 – 7.32 (m, 5H), 7.26 – 7.25 (m, 2H), 7.15 (d,  $J = 7.9$  Hz, 2H), 4.78 (dd,  $J = 8.0, 5.8$  Hz, 1H), 3.28 – 3.26 (m, 2H), 2.35 (s, 3H).

$^{13}\text{C}$  NMR (126 MHz,  $\text{CDCl}_3$ )  $\delta$  137.73, 137.69, 134.85, 131.92, 130.36, 130.11, 128.95, 128.68, 126.11, 60.98, 44.07, 21.10.

**1-(2-isothiocyanato-2-phenylethylthio)-2-methylbenzene (4g):**

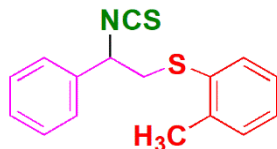

Yellow oil (46 mg, 81%).  $^1\text{H}$  NMR (500 MHz,  $\text{CDCl}_3$ )  $\delta$  7.35 – 7.27 (m, 1H), 7.13 (d,  $J$  = 7.9 Hz, 1H), 4.68 (dd,  $J$  = 9.6, 3.4 Hz, 1H), 3.28 (dd,  $J$  = 13.8, 3.4 Hz, 1H), 3.03 (dd,  $J$  = 13.8, 9.6 Hz, 1H), 2.34 (s, 1H).  $^{13}\text{C}$  NMR (126 MHz,  $\text{CDCl}_3$ )  $\delta$  141.28, 136.81, 134.56, 129.77, 129.31, 128.93, 128.85, 128.51, 128.02, 126.69, 125.94, 64.69, 41.66, 15.23.

**1-(2-isothiocyanato-2-p-tolyethylthio)-4-methylbenzene (4i):**

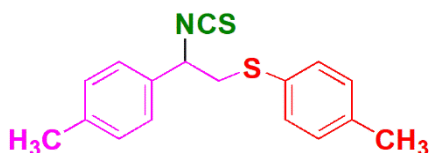

Yellow oil (53 mg, 88%).  $^1\text{H}$  NMR (500 MHz,  $\text{CDCl}_3$ )  $\delta$  7.35 – 7.32 (m, 2H), 7.17 – 7.13 (m, 6H), 4.75 – 4.72 (m, 1H), 3.26 – 3.24 (m, 2H), 2.34 (s, 6H).  $^{13}\text{C}$  NMR (126 MHz,  $\text{CDCl}_3$ )  $\delta$  138.61, 137.66, 134.75, 131.86, 130.44, 130.09, 129.65, 129.60, 126.04, 60.78, 43.96, 21.15, 21.11.

**4. General procedure for electrophilic reaction of  $\beta$ -isothiocyanato sulfides with bicyclic amidines to afford  $\beta$ -thiouredo sulfides 7a-7i and 8a-8i.**

To a 15 ml vial with a stir bar were added diphenyl disulphide **1** (0.1 mmol, 0.5 equiv), styrene **2** (0.24 mmol, 1.2 equiv), potassium thiocyanate **3** (0.22 mmol, 1.1 equiv and iodine (0.2 mmol, 1 equiv). This was followed with the addition of water (1 ml) and the reaction mixture was stirred in open atmosphere at 60  $^{\circ}\text{C}$ . The reaction was stirred for 12 hr to afford  $\beta$ -isothiocyanato sulfide **4**. Subsequently, bicyclic amidines DBN **5** or DBU **6** was added and the reaction mixture was further stirred for another 0.5 hr. After completion the reaction was quenched with saturated solution of sodium thiosulfate in water. The compound was extracted with ethyl acetate and dried over anhydrous  $\text{Na}_2\text{SO}_4$  followed by filtration. The filtrate was concentrated using rotary evaporation under vacuum and the compound was purified with 50-

60% (DBU as nucleophile) or 50-70% (DBN as nucleophile) ethyl acetate/hexane solvent using silica gel column chromatography.

**1-(3-(2-Oxopyrrolidin-1-yl)propyl)-3-(1-phenyl-2-(phenylthio)ethyl)thiourea (7a):**

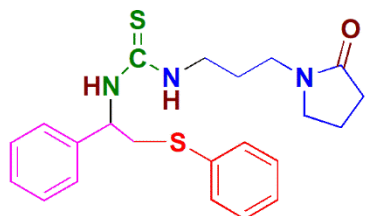

White semi solid (61 mg, 74%).  $^1\text{H NMR}$  (500 MHz,  $\text{CDCl}_3$ )  $\delta$  7.37 – 7.34 (m, 4H), 7.32 – 7.29 (m, 2H), 7.25 – 7.24 (m, 3H), 7.19 – 7.16 (m, 1H), 7.02 (s, 1H), 6.82 (d,  $J = 6.45$  Hz, 1H), 5.33 (s, 1H), 3.57 – 3.54 (m, 1H), 3.41 – 3.30 (m, 5H), 3.07 – 3.06 (m, 2H), 2.33 (t,  $J = 7.85$  Hz, 2H), 2.03 – 1.97 (m, 2H), 1.74 – 1.70 (m, 1H), 1.66 – 1.60 (m, 1H).  $^{13}\text{C NMR}$  (126 MHz,  $\text{CDCl}_3$ )  $\delta$  181.42, 176.02, 139.83, 135.38, 130.26, 129.01, 128.72, 127.95, 126.77, 126.59, 56.67, 47.51, 41.20, 40.92, 39.55, 30.91, 25.97, 17.88, 14.20. **HRMS (ESI):** Mass calcd for  $\text{C}_{22}\text{H}_{27}\text{N}_3\text{OS}_2\text{H}$   $[\text{M}+\text{H}]^+$ : 414.1674; found: 414.1671.

**1-(3-(2-Oxopyrrolidin-1-yl)propyl)-3-(2-(phenylthio)-1-p-tolyethyl)thiourea (7b):**

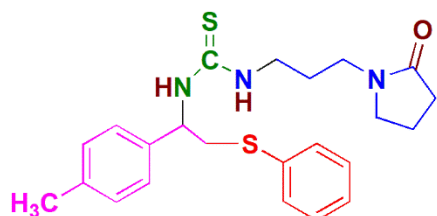

White semi solid (66 mg, 77%).  $^1\text{H NMR}$  (500 MHz,  $\text{CDCl}_3$ )  $\delta$  7.35 (d,  $J = 7.3$  Hz, 2H), 7.27 – 7.22 (m, 4H), 7.17 (t,  $J = 7.3$  Hz, 1H), 7.11 (d,  $J = 7.85$  Hz, 2H), 6.98 (s, 1H), 6.80 (d,  $J = 6.95$  Hz, 1H), 5.29 (s, 1H), 3.54 – 3.50 (m, 1H), 3.44 – 3.30 (m, 5H), 3.10 – 3.08 (m, 2H), 2.33 (t,  $J = 7.9$  Hz, 2H), 2.31 (s, 3H), 2.02 – 1.96 (m, 2H), 1.78 – 1.69 (m, 1H), 1.64 – 1.61 (m, 1H).  $^{13}\text{C NMR}$  (126 MHz,  $\text{CDCl}_3$ )  $\delta$  181.39, 175.96, 137.66, 136.79, 135.48, 130.15, 129.42, 128.98, 126.66, 126.48, 60.40, 56.44, 47.49, 41.24, 40.83, 39.59, 30.92, 26.00, 21.12, 17.89, 14.20. **HRMS (ESI):** Mass calcd for  $\text{C}_{23}\text{H}_{29}\text{N}_3\text{OS}_2\text{H}$   $[\text{M}+\text{H}]^+$ : 428.1830; found: 428.1827.

**1-(1-(4-Chlorophenyl)-2-(phenylthio)ethyl)-3-(3-(2-oxopyrrolidin-1-yl)propyl)thiourea (7c):**

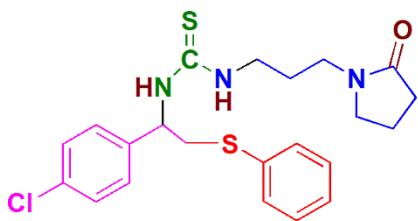

White semi solid (64 mg, 71%). **<sup>1</sup>H NMR** (500 MHz, CDCl<sub>3</sub>) δ 8.10 (s, 1H), 7.51 (s, 1H), 7.41 – 7.35 (m, 6H), 7.30 (t, *J* = 7.7 Hz, 2H), 7.21 – 7.18 (m, 1H), 5.57 (s, 1H), 3.50 – 3.46 (m, 1H), 3.36 – 3.34 (m, 2H), 3.32 – 3.29 (m, 3H), 3.16 (m, 2H), 2.21 (t, *J* = 8.25 Hz, 2H), 1.93 – 1.87 (m, 2H) 1.66 – 1.63 (m, 2H). **<sup>13</sup>C NMR (126 MHz, CDCl<sub>3</sub>)** δ 181.39, 176.00, 139.76, 135.32, 130.33, 129.02, 128.74, 127.97, 126.75, 126.63, 56.64, 47.51, 41.17, 41.00, 39.49, 30.89, 29.69, 25.95, 17.89. **HRMS (ESI):** Mass calcd for C<sub>22</sub>H<sub>26</sub>ClN<sub>3</sub>OS<sub>2</sub>H [M+H]<sup>+</sup>: 448.1284; found: 448.1284.

**1-(2-(*p*-Tolylthio)-1-phenylethyl)-3-(3-(2-oxopyrrolidin-1-yl)propyl)thiourea (7d):**

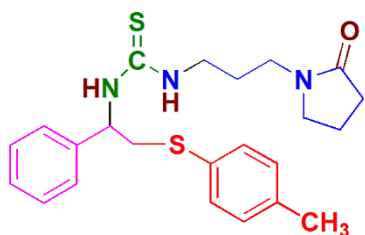

White semi solid (67 mg, 79%). **<sup>1</sup>H NMR (500 MHz, CDCl<sub>3</sub>)** δ 7.35 – 7.27 (m, 6H), 7.26 – 7.23 (m, 1H), 7.07 (d, *J* = 8 Hz, 2H), 6.95 (s, 1H), 6.73 (d, *J* = 5.9 Hz, 1H), 5.22 (s, 1H), 3.59 – 3.55 (m, 1H), 3.40 – 3.29 (m, 5H), 3.05 – 3.03 (m, 2H), 2.34 (t, *J* = 8.3 Hz, 2H), 2.30 (s, 3H), 2.03 – 1.97 (m, 2H), 1.74 – 1.67 (m, 1H), 1.62 – 1.59 (m, 1H). **<sup>13</sup>C NMR (126 MHz, CDCl<sub>3</sub>)** δ 181.33, 175.96, 139.83, 136.94, 131.38, 131.20, 129.85, 128.73, 127.92, 126.71, 56.62, 47.49, 41.81, 41.22, 39.45, 30.90, 25.98, 21.05, 17.90. **HRMS (ESI):** Mass calcd for C<sub>23</sub>H<sub>29</sub>N<sub>3</sub>OS<sub>2</sub>H [M+H]<sup>+</sup>: 428.1830; found: 428.1827.

**1-(2-(4-Chlorophenylthio)-1-phenylethyl)-3-(3-(2-oxopyrrolidin-1-yl)propyl)thiourea (7e):**

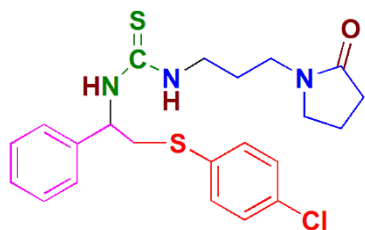

White semi solid (64 mg, 72%).  $^1\text{H NMR}$  (500 MHz,  $\text{CDCl}_3$ )  $\delta$  7.34 (dt,  $J = 3.3, 1.9$  Hz, 2H), 7.30 – 7.28 (m, 2H), 7.27 – 7.23 (m, 4H), 7.18 (ddd,  $J = 8.5, 2.4, 1.2$  Hz, 1H), 7.14 (s, 1H), 6.96 (s, 1H), 5.39 (s, 1H), 3.55 – 3.52 (m, 1H), 3.44 – 3.21 (m, 5H), 3.15 – 3.09 (m, 2H), 2.35 (t,  $J = 8.55$  Hz, 2H), 2.04 – 1.98 (m, 2H), 1.74 – 1.72 (m, 1H), 1.66 – 1.59 (m, 1H).  $^{13}\text{C NMR}$  ( $^{13}\text{C NMR}$  (126 MHz, DMSO)  $\delta$  181.49, 173.89, 140.34, 135.74, 131.68, 128.88, 128.70, 128.25, 128.10, 125.68, 59.62, 46.19, 38.15, 30.35, 26.37, 20.63, 17.40, 13.96. **HRMS (ESI)** Mass calcd for  $\text{C}_{22}\text{H}_{26}\text{ClN}_3\text{OS}_2\text{H}$   $[\text{M}+\text{H}]^+$ : 448.1284; found: 448.1287.

**1-(2-(4-Bromophenylthio)-1-phenylethyl)-3-(3-(2-oxopyrrolidin-1-yl)propyl)thiourea (7f):**

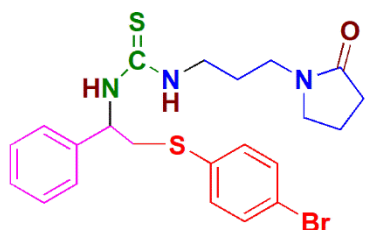

White semi solid (58 mg, 59%).  $^1\text{H NMR}$  (500 MHz,  $\text{CDCl}_3$ )  $\delta$  8.05 (s, 1H), 7.51 (s, 1H), 7.47 (dd,  $J = 6.8, 1.75$  Hz, 2H), 7.35 – 7.31 (m, 6H), 7.29 – 7.25 (m, 1H), 5.58 (s, 1H), 3.52 – 3.48 (m, 1H), 3.39 – 3.35 (m, 3H), 3.32 – 3.30 (m, 2H), 3.15 (bs, 2H), 2.21 (t,  $J = 8.25$  Hz, 2H), 1.94 – 1.87 (m, 2H) 1.65 – 1.63 (m, 2H).  $^{13}\text{C NMR}$  (126 MHz, DMSO)  $\delta$  181.85, 173.88, 141.05, 135.68, 131.59, 130.08, 128.22, 127.21, 126.80, 118.46, 59.63, 46.21, 38.16, 30.35, 26.40, 20.64, 17.40, 13.97. **HRMS (ESI):** Mass calcd for  $\text{C}_{22}\text{H}_{26}\text{BrN}_3\text{OS}_2\text{H}$   $[\text{M}+\text{H}]^+$ : 492.0779; found: 492.0780.

**1-(2-(o-Tolylthio)-1-phenylethyl)-3-(3-(2-oxopyrrolidin-1-yl)propyl)thiourea (7g):**

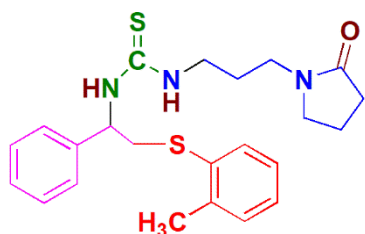

White semi solid (67 mg, 78%).  $^1\text{H NMR}$  (500 MHz,  $\text{CDCl}_3$ )  $\delta$  7.37 – 7.34 (m, 2H), 7.33 – 7.28 (m, 3H), 7.26 – 7.23 (m, 1H), 7.17 – 7.06 (m, 3H), 7.01 (s, 1H), 6.83 (d,  $J = 6.25$  Hz, 1H), 5.29 (s, 1H), 3.58 – 3.54 (m, 1H), 3.41 – 3.27 (m, 5H), 3.05 (d,  $J = 4.5$  Hz, 1H), 2.35 (s, 3H),



2.33-2.29 (m, 2H), 2.02 – 1.96 (m, 2H), 1.75 – 1.67 (m, 1H), 1.63 – 1.61 (m, 1H). <sup>13</sup>C NMR (126 MHz, CDCl<sub>3</sub>) δ 181.39, 175.98, 139.91, 138.54, 134.55, 130.25, 129.79, 128.72, 127.94, 126.73, 126.57, 126.53, 56.64, 47.49, 41.24, 40.27, 39.52, 30.90, 26.00, 20.59, 17.88. HRMS (ESI): Mass calcd for C<sub>23</sub>H<sub>29</sub>N<sub>3</sub>OS<sub>2</sub>H [M+H]<sup>+</sup>: 428.1830; found: 428.1829.

**1-(2-(p-Tolylthio)-1-(4-chlorophenyl)ethyl)-3-(3-(2-oxopyrrolidin-1-yl)propyl)thiourea (7h):**

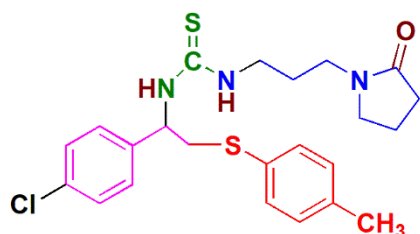

White semi solid (68 mg, 74%). <sup>1</sup>H NMR (500 MHz, CDCl<sub>3</sub>) δ 7.28 – 7.23 (m, 7H), 7.11 (s, 1H), 7.06 (d, *J* = 7.9 Hz, 2H), 6.91 (s, 1H), 5.30 (s, 1H), 3.57 – 3.53 (m, 1H), 3.43-3.22 (m, 5H), 3.14 – 3.06 (m, 2H), 2.35 (t, *J* = 8.45 Hz, 2H), 2.30 (s, 3H), 2.03 – 1.98 (m, 2H), 1.77 – 1.70 (m, 1H), 1.65 – 1.62 (m, 1H). <sup>13</sup>C NMR (126 MHz, CDCl<sub>3</sub>) δ 181.43, 176.08, 138.64, 137.03, 133.52, 131.21, 129.85, 128.72, 128.24, 56.10, 47.54, 41.60, 41.12, 39.55, 30.93, 25.96, 21.05, 17.89. HRMS (ESI): Mass calcd for C<sub>23</sub>H<sub>28</sub>ClN<sub>3</sub>OS<sub>2</sub>H [M+H]<sup>+</sup>: 462.1441; found: 462.1443.

**1-(2-(p-Tolylthio)-1-p-tolyethyl)-3-(3-(2-oxopyrrolidin-1-yl)propyl)thiourea (7i):**

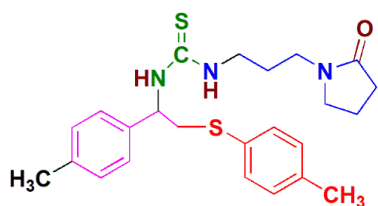

White semi solid (75 mg, 85%). <sup>1</sup>H NMR (500 MHz, CDCl<sub>3</sub>) δ 7.27 (d, *J* = 7.3 Hz, 2H), 7.21 (d, *J* = 8.05 Hz, 2H), 7.10 (d, *J* = 7.9 Hz, 2H), 7.06 (d, *J* = 7.95 Hz, 2H), 6.92 (s, 1H), 6.77 (d, *J* = 6.95 Hz, 1H), 5.20 (s, 1H), 3.55 – 3.51 (m, 1H), 3.44 – 3.37 (m, 1H), 3.36 – 3.24 (m, 4H), 3.11 – 3.06 (m, 2H), 2.33 (t, *J* = 8.45 Hz, 2H), 2.31 (s, 3H), 2.30 (s, 3H), 2.01 – 1.97 (m, 2H), 1.76 – 1.69 (m, 1H), 1.64 – 1.60 (m, 1H). <sup>13</sup>C NMR (126 MHz, CDCl<sub>3</sub>) δ 181.36, 175.93, 137.61, 136.85, 136.78, 131.53, 131.04, 129.80, 129.40, 126.62, 56.42, 47.48, 41.67, 41.27, 39.55, 30.92, 26.02, 21.12, 21.05, 17.90. HRMS (ESI): Mass calcd for C<sub>24</sub>H<sub>31</sub>N<sub>3</sub>OS<sub>2</sub>H [M+H]<sup>+</sup>: 442.1987; found: 442.1990.

**1-(1-Naphthalen-2-yl-2-p-tolylsulfanyl-ethyl)-3-[3-(2-oxo-pyrrolidin-1-yl)-propyl]-thiourea (7j):**

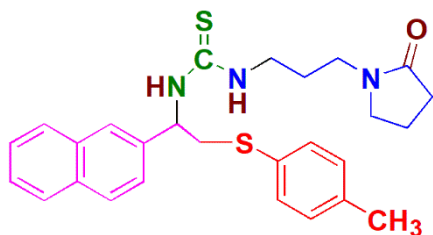

White semi solid (77 mg, 81%).  $^1\text{H NMR}$  (500 MHz,  $\text{CDCl}_3$ )  $\delta$  7.74 – 7.69 (m, 4H), 7.44 – 7.34 (m, 3H), 7.27 – 7.12 (m, 3H), 7.07 – 6.95 (m, 3H), 5.36 (s, 1H), 3.47 – 3.42 (m, 1H), 3.37 – 3.27 (m, 3H), 3.25 – 3.13 (m, 2H), 3.08 – 2.90 (m, 2H), 2.27 – 2.24 (m, 2H), 2.20 (s, 3H), 1.91 – 1.85 (m, 2H), 1.68 – 1.61 (m, 1H), 1.57 – 1.49 (m, 1H).  $^{13}\text{C NMR}$  (126 MHz,  $\text{CDCl}_3$ )  $\delta$  180.47, 174.99, 136.29, 135.88, 132.24, 131.98, 130.33, 130.21, 128.77, 127.55, 127.04, 126.58, 125.15, 124.99, 124.79, 123.61, 55.80, 46.44, 40.59, 40.24, 38.50, 29.86, 28.67, 24.89, 20.00, 16.82. Mass calcd for  $\text{C}_{27}\text{H}_{32}\text{N}_3\text{OS}_2\text{H}$   $[\text{M}+\text{H}]^+$ : 478.1987; found: 478.2005

**1-(3-(2-Oxazepan-1-yl)propyl)-3-(1-phenyl-2-(phenylthio)ethyl)thiourea (8a):**

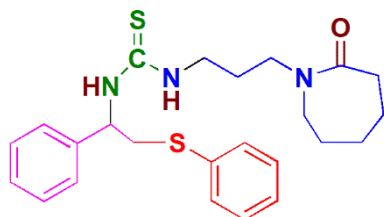

White semi solid (68 mg, 76%).  $^1\text{H NMR}$  (500 MHz,  $\text{CDCl}_3$ )  $\delta$  7.38 – 7.34 (m, 4H), 7.32 – 7.28 (m, 2H), 7.27 – 7.21 (m, 4H), 7.19 – 7.15 (m, 1H), 6.71 (d,  $J = 6.7$  Hz, 1H), 5.34 (s, 1H), 3.58 – 3.55 (m, 1H), 3.42 – 3.32 (m, 3H), 3.28 – 3.26 (m, 2H), 3.14 (bs, 2H), 2.47 (t,  $J = 5.75$  Hz, 2H), 1.74 – 1.67 (m, 3H), 1.65 – 1.57 (m, 5H).  $^{13}\text{C NMR}$  (126 MHz,  $\text{CDCl}_3$ )  $\delta$  181.27, 176.94, 139.82, 135.43, 130.27, 128.99, 128.66, 127.90, 126.82, 126.55, 56.59, 49.72, 45.10, 41.11, 40.91, 37.10, 29.87, 28.36, 26.76, 23.30. **HRMS (ESI):** Mass calcd for  $\text{C}_{24}\text{H}_{31}\text{N}_3\text{OS}_2\text{H}$   $[\text{M}+\text{H}]^+$ : 442.1987; found: 442.2017.

**1-(3-(2-Oxazepan-1-yl)propyl)-3-(2-(phenylthio)-1-p-tolyloethyl)thiourea (8b):**

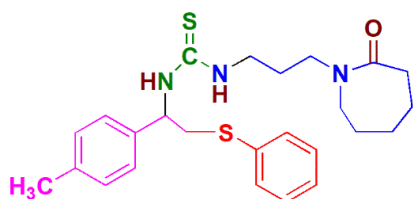

White semi solid (76 mg, 83%). **<sup>1</sup>H NMR (500 MHz, CDCl<sub>3</sub>)** δ 7.35 – 7.34 (m, 2H), 7.31 – 7.22 (m, 5H), 7.17 (s, 1H), 7.06 (d, *J* = 7.9 Hz, 2H), 6.77 (d, *J* = 6.95 Hz, 1H), 5.27 (s, 1H), 3.58 – 3.55 (m, 1H), 3.43 – 3.38 (m, 1H), 3.34-3.22 (m, 4H), 3.13 (bs, 2H), 2.46 (t, *J* = 5.75 Hz, 2H), 2.30 (s, 3H), 1.74-1.66 (m, 3H), 1.65 – 1.56 (m, 5H). **<sup>13</sup>C NMR (126 MHz, CDCl<sub>3</sub>)** δ 181.16, 176.88, 139.96, 136.80, 131.54, 131.11, 129.81, 128.63, 127.82, 126.80, 56.60, 49.71, 49.13, 45.09, 41.16, 37.10, 29.87, 28.36, 26.81, 23.37, 21.05. **HRMS (ESI):** Mass calcd for C<sub>25</sub>H<sub>33</sub>N<sub>3</sub>OS<sub>2</sub>H [M+H]<sup>+</sup>: 456.2143; found: 456.2159.

**1-(1-(4-Chlorophenyl)-2-(phenylthio)ethyl)-3-(3-(2-oxoazepan-1-yl)propyl)thiourea (8c):**

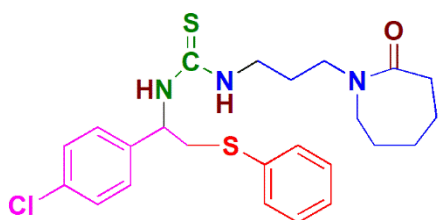

White semi solid (69 mg, 72%). **<sup>1</sup>H NMR (500 MHz, CDCl<sub>3</sub>)** δ 7.35 – 7.33 (m, 2H), 7.30 – 7.29 (m, 2H), 7.27 – 7.23 (m, 5H), 7.20 – 7.17 (m, 1H), 6.82 (s, 1H), 5.36 (s, 1H), 3.55 – 3.49 (m, 1H), 3.45 – 3.36 (m, 2H), 3.32 – 3.28 (m, 3H), 3.22 – 3.16 (m, 2H), 2.47 (t, *J* = 6.05 Hz, 2H), 1.74 – 1.68 (m, 3H), 1.66 – 1.58 (m, 5H). **<sup>13</sup>C NMR (126 MHz, CDCl<sub>3</sub>)** δ 181.23, 177.07, 138.55, 135.12, 133.54, 130.40, 129.03, 128.70, 128.32, 126.69, 56.00, 49.73, 45.10, 41.01, 40.84, 37.10, 29.86, 29.69, 28.31, 23.36. **HRMS (ESI):** Mass calcd for C<sub>24</sub>H<sub>30</sub>ClN<sub>3</sub>OS<sub>2</sub>H [M+H]<sup>+</sup>: 476.1597; found: 476.1611.

**1-(2-(p-Tolylthio)-1-phenylethyl)-3-(3-(2-oxoazepan-1-yl)propyl)thiourea (8d):**

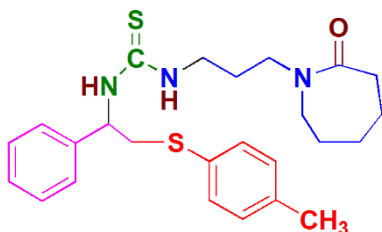

White semi solid (76 mg, 83%). **<sup>1</sup>H NMR (500 MHz, CDCl<sub>3</sub>)** δ 7.26 (d, *J* = 7.25 Hz, 2H), 7.22 – 7.18 (m, 4H), 7.16 – 7.14 (m, 2H), 6.98 (d, *J* = 7.95 Hz, 2H), 6.89 (d, *J* = 7.25 Hz, 1H), 5.24 (bs, 1H), 3.48 – 3.47 (m, 1H), 3.35 – 3.24 (m, 2H), 3.22 – 3.17 (m, 3H), 3.07 (bs, 2H), 2.37 (t, *J* = 5.8 Hz, 2H), 2.22 (s, 3H), 1.65 – 1.57 (m, 3H), 1.55 – 1.48 (m, 5H). **<sup>13</sup>C NMR (126 MHz, CDCl<sub>3</sub>)** δ 181.25, 176.83, 140.09, 136.68, 131.66, 130.98, 129.78, 128.60, 127.76,

126.83, 56.67, 49.72, 45.21, 41.55, 41.23, 37.08, 29.84, 28.35, 26.90, 23.35, 21.04. **HRMS (ESI):** Mass calcd for C<sub>25</sub>H<sub>33</sub>N<sub>3</sub>OS<sub>2</sub>H [M+H]<sup>+</sup> : 456.2143; found: 456.2162.

**1-(2-(4-chlorophenylthio)-1-phenylethyl)-3-(3-(2-oxoazepan-1-yl)propyl)thiourea (8e):**

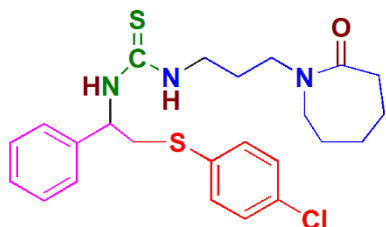

White semi solid (71 mg, 74%). **<sup>1</sup>H NMR (500 MHz, CDCl<sub>3</sub>)** δ 7.35 – 7.33 (m, 2H), 7.30 – 7.29 (m, 3H), 7.26 – 7.23 (m, 4H), 7.20 – 7.17 (m, 1H), 6.77 (s, 1H), 5.36 (s, 1H), 3.57 – 3.53 (m, 1H), 3.46 – 3.35 (m, 2H), 3.32 – 3.24 (m, 3H), 3.22 – 3.16 (m, 2H), 2.48 (t, *J* = 6.15 Hz, 2H), 1.76 – 1.68 (m, 3H), 1.67 – 1.59 (m, 5H). **<sup>13</sup>C NMR (126 MHz, CDCl<sub>3</sub>)** δ 181.22, 177.10, 138.54, 135.10, 133.55, 130.43, 129.04, 128.71, 128.31, 126.71, 56.00, 49.73, 45.08, 40.98, 40.87, 37.10, 29.87, 28.31, 26.67, 23.36. **HRMS (ESI):** Mass calcd for C<sub>24</sub>H<sub>30</sub>ClN<sub>3</sub>OS<sub>2</sub>H [M+H]<sup>+</sup> : 476.1597; found: 476.1612.

**1-(2-(4-Bromophenylthio)-1-phenylethyl)-3-(3-(2-oxoazepan-1-yl)propyl)thiourea (8f):**

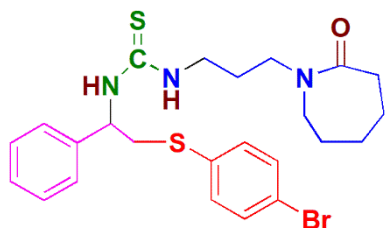

White semi solid (70 mg, 67%). **<sup>1</sup>H NMR (500 MHz, CDCl<sub>3</sub>)** δ 7.37 – 7.34 (m, 4H), 7.32 – 7.27 (m, 3H), 7.26 – 7.21 (m, 3H), 6.56 (s, 1H), 5.34 (s, 1H), 3.56 – 3.53 (m, 1H), 3.47 – 3.37 (m, 2H), 3.34 – 3.27 (m, 3H), 3.15 (bs, 2H), 2.48 (t, *J* = 5.75 Hz, 2H), 1.75 – 1.70 (m, 3H), 1.67 – 1.59 (m, 5H). **<sup>13</sup>C NMR (126 MHz, CDCl<sub>3</sub>)** δ 181.09, 177.06, 139.56, 134.58, 131.99, 131.84, 128.72, 128.01, 126.85, 120.50, 49.71, 45.00, 40.96, 40.62, 37.10, 29.88, 29.70, 28.32, 23.39. **HRMS (ESI):** Mass calcd for C<sub>24</sub>H<sub>30</sub>BrN<sub>3</sub>OS<sub>2</sub>H [M+H]<sup>+</sup> : 520.1092; found: 520.1058.

**1-(2-(o-Tolylthio)-1-phenylethyl)-3-(3-(2-oxoazepan-1-yl)propyl)thiourea (8g):**

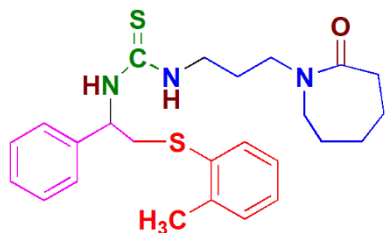

White semi solid (78 mg, 85%).  $^1\text{H NMR}$  (500 MHz,  $\text{CDCl}_3$ )  $\delta$  7.38 – 7.34 (m, 3H), 7.32 – 7.28 (m, 2H), 7.26 – 7.22 (m, 2H), 7.15 – 7.10 (m, 2H), 7.09 – 7.06 (m, 1H), 6.74 (d,  $J = 6.55$  Hz, 1H), 5.29 (s, 1H), 3.58 – 3.56 (m, 1H), 3.44 – 3.38 (m, 1H), 3.36 – 3.25 (m, 4H), 3.12 (bs, 2H), 2.46 (t,  $J = 5.7$  Hz, 2H), 2.35 (s, 3H), 1.74 – 1.66 (m, 3H), 1.65 – 1.56 (m, 5H).  $^{13}\text{C NMR}$  (126 MHz,  $\text{CDCl}_3$ )  $\delta$  181.12, 176.89, 139.92, 138.53, 134.62, 131.13, 130.22, 129.78, 128.66, 127.88, 126.79, 126.56, 56.56, 49.72, 45.09, 41.16, 40.28, 37.10, 29.87, 28.37, 26.80, 23.37, 20.59. **HRMS (ESI):** Mass calcd for  $\text{C}_{25}\text{H}_{33}\text{N}_3\text{OS}_2\text{H}$   $[\text{M}+\text{H}]^+$ : 456.2143; found: 456.2160.

**1-(2-(p-Tolylthio)-1-(4-chlorophenyl)ethyl)-3-(3-(2-oxoazepan-1-yl)propyl)thiourea (8h):**

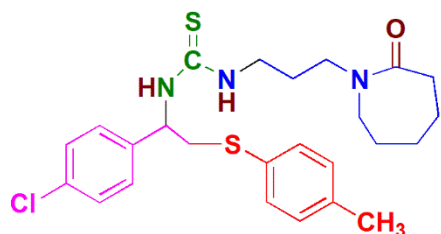

White semi solid (76 mg, 78%).  $^1\text{H NMR}$  (500 MHz,  $\text{CDCl}_3$ )  $\delta$  7.28 – 7.27 (m, 3H), 7.26 – 7.22 (m, 4H), 7.05 (d,  $J = 7.9$  Hz, 2H), 6.74 (s, 1H), 5.27 (s, 1H), 3.56 – 3.53 (m, 1H), 3.45 – 3.39 (m, 1H), 3.33 – 3.22 (m, 4H), 3.20 – 3.14 (m, 2H), 2.47 (t,  $J = 5.9$  Hz, 2H), 2.30 (s, 3H), 1.77 – 1.68 (m, 3H), 1.67 – 1.57 (m, 5H).  $^{13}\text{C NMR}$  (126 MHz,  $\text{CDCl}_3$ )  $\delta$  181.17, 177.03, 138.60, 137.02, 133.49, 131.26, 131.19, 129.85, 128.67, 128.29, 55.98, 49.72, 45.05, 41.65, 41.04, 37.11, 29.87, 28.33, 26.70, 23.38, 21.06. **HRMS (ESI):** Mass calcd for  $\text{C}_{25}\text{H}_{32}\text{ClN}_3\text{OS}_2\text{H}$   $[\text{M}+\text{H}]^+$ : 490.1754; found: 490.1777.

**1-(2-(p-Tolylthio)-1-p-tolyethyl)-3-(3-(2-oxoazepan-1-yl)propyl)thiourea (8i):**

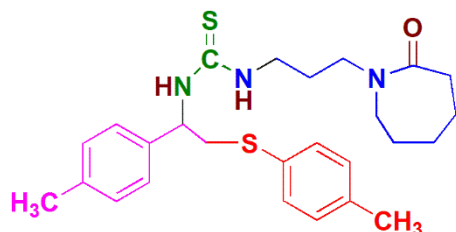

White semi solid (83 mg, 89%).  $^1\text{H NMR}$  (500 MHz,  $\text{CDCl}_3$ )  $\delta$  7.27 (dd,  $J = 6.7, 1.4$  Hz, 2H), 7.22 (d,  $J = 8.0$  Hz, 2H), 7.14 (s, 1H), 7.10 (d,  $J = 7.9$  Hz, 2H), 7.06 (d,  $J = 7.9$  Hz, 2H), 6.82 (d,  $J = 7.3$  Hz, 1H), 5.25 (s, 1H), 3.53 – 3.51 (m, 1H), 3.45 – 3.38 (m, 1H), 3.35 – 3.23 (m, 4H), 3.16 (d,  $J = 4.6$  Hz, 2H), 2.48 – 2.44 (m, 2H), 2.30 (s, 6H), 1.73 – 1.66 (m, 3H), 1.65 – 1.56 (m, 5H).  $^{13}\text{C NMR}$  (126 MHz,  $\text{CDCl}_3$ )  $\delta$  181.17, 176.83, 137.47, 136.98, 136.65, 131.68, 130.96, 129.76, 129.31, 126.70, 56.41, 49.71, 45.17, 41.55, 41.20, 37.10, 29.86, 28.36, 26.85, 23.36, 21.12, 21.04, 14.20. **HRMS (ESI):** Mass calcd for  $\text{C}_{26}\text{H}_{35}\text{N}_3\text{OS}_2\text{H}$   $[\text{M}+\text{H}]^+$  : 470.2300; found: 470.2324.

### 5. General procedure for synthesis of sulphonamide derivatives 10a-10e and 11a-11e.

To a stirred solution of DBN **5** or DBU **6** (0.25 mmol, 2.0 equiv) in water at 70 °C was added sulfonyl chloride **9** (0.1 mmol, 1 equiv) and continued to stir for 1 hr. After 1 hr the reaction mixture was cooled to room temperature and extracted with ethyl acetate. The organic layer was dried over anhydrous sodium sulphate and filtered. After rotary evaporation of ethyl acetate, the residue was purified using 70% (DBN as nucleophile) or 60% (DBU as nucleophile) ethyl acetate/hexane as mobile phase using silica gel column chromatography.

#### N-(3-(2-oxopyrrolidin-1-yl)propyl)benzenesulfonamide (10a):

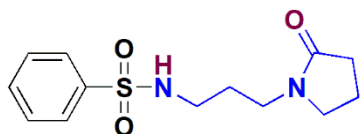

Transparent oil (48 mg, 86%).  $^1\text{H NMR}$  (500 MHz,  $\text{CDCl}_3$ )  $\delta$  7.88 – 7.86 (m, 2H), 7.57 – 7.53 (m, 1H), 7.51 – 7.48 (m, 2H), 6.25 (t,  $J = 6.5$  Hz, 1H), 3.32 (td,  $J = 6.7, 3.1$  Hz, 4H), 2.88 (dd,  $J = 12.6, 6.5$  Hz, 2H), 2.34 – 2.31 (m, 2H), 1.99 (ddd,  $J = 15.5, 9.3, 5.5$  Hz, 2H), 1.72 – 1.67 (m, 2H).  $^{13}\text{C NMR}$  (126 MHz,  $\text{CDCl}_3$ )  $\delta$  176.02, 140.30, 132.35, 128.99, 126.94, 47.39, 39.85, 39.38, 30.74, 26.91, 17.83. **HRMS (ESI):** Mass calcd for  $\text{C}_{13}\text{H}_{18}\text{N}_2\text{O}_3\text{SH}$   $[\text{M}+\text{H}]^+$  : 283.1116; found: 283.1133.

#### 4-Methyl-N-(3-(2-oxopyrrolidin-1-yl)propyl)benzenesulfonamide (10b):

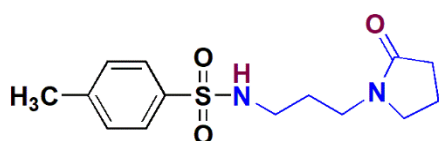

White solid (50 mg, 91%). Melting point: 124-125 °C **<sup>1</sup>H NMR (500 MHz, CDCl<sub>3</sub>)** δ 7.74 (d, *J* = 8.3 Hz, 2H), 7.29 – 7.28 (m, 2H), 6.05 (t, *J* = 6.6 Hz, 1H), 3.32 (td, *J* = 6.7, 3.6 Hz, 4H), 2.86 (dd, *J* = 12.6, 6.5 Hz, 2H), 2.41 (s, 3H), 2.35 – 2.32 (m, 2H), 1.99 (ddd, *J* = 15.5, 9.4, 5.5 Hz, 2H), 1.72 – 1.657 (m, 2H). **<sup>13</sup>C NMR (126 MHz, CDCl<sub>3</sub>)** δ 175.96, 143.04, 137.39, 129.58, 127.02, 47.39, 39.82, 39.39, 30.74, 26.96, 21.47, 17.87. **HRMS (ESI):** Mass calcd for C<sub>14</sub>H<sub>20</sub>N<sub>2</sub>O<sub>3</sub>SH [M+H]<sup>+</sup> : 297.1273; found: 297.1281.

#### 2-Methyl-N-(3-(2-oxopyrrolidin-1-yl)propyl)benzenesulfonamide (10c):

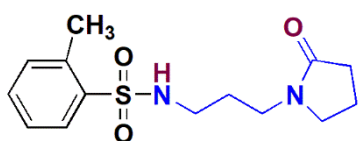

Transparent oil (48 mg, 89%). **<sup>1</sup>H NMR (500 MHz, CDCl<sub>3</sub>)** δ 7.93 (d, *J* = 8.0 Hz, 1H), 7.44 – 7.41 (m, 1H), 7.30 – 7.27 (m, 2H), 6.23 (t, *J* = 6.5 Hz, 1H), 3.35 – 3.30 (m, 4H), 2.90 (dd, *J* = 12.5, 6.5 Hz, 2H), 2.67 (s, 3H), 2.39 – 2.32 (m, 2H), 2.04 – 1.98 (m, 2H), 1.70 – 1.64 (m, 2H). **<sup>13</sup>C NMR (126 MHz, CDCl<sub>3</sub>)** δ 176.12, 137.14, 132.51, 129.58, 129.00, 127.01, 125.98, 47.44, 39.64, 30.80, 27.29, 20.23, 17.87. **HRMS (ESI):** Mass calcd for C<sub>14</sub>H<sub>20</sub>N<sub>2</sub>O<sub>3</sub>SH [M+H]<sup>+</sup> : 297.1273; found: 297.1288.

#### 4-Chloro-N-(3-(2-oxopyrrolidin-1-yl)propyl)benzenesulfonamide (10d):

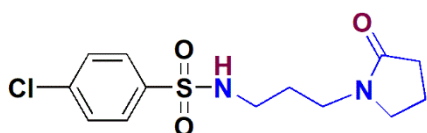

Transparent oil (52 mg, 82%). **<sup>1</sup>H NMR (500 MHz, CDCl<sub>3</sub>)** δ 7.75 – 7.72 (m, 2H), 7.64 – 7.62 (m, 2H), 6.31 (t, *J* = 6.5 Hz, 1H), 3.34 (t, *J* = 6.8 Hz, 4H), 2.87 (dd, *J* = 12.3, 6.4 Hz, 2H), 2.35 (t, *J* = 8.1 Hz, 2H), 2.04 – 1.98 (m, 2H), 1.73 – 1.68 (m, 2H). **<sup>13</sup>C NMR (126 MHz, CDCl<sub>3</sub>)** δ 176.18, 139.57, 132.22, 128.63, 127.16, 47.48, 39.71, 39.33, 30.72, 26.98, 17.88. **HRMS (ESI):** Mass calcd for C<sub>13</sub>H<sub>17</sub>ClN<sub>2</sub>O<sub>3</sub>SH [M+H]<sup>+</sup> : 317.0727; found: 317.0725.

#### 4-Bromo-N-(3-(2-oxopyrrolidin-1-yl)propyl)benzenesulfonamide (10e):

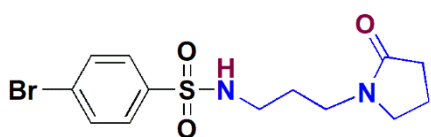

Transparent oil (56 mg, 78%).  $^1\text{H NMR}$  (500 MHz,  $\text{CDCl}_3$ )  $\delta$  7.75 – 7.72 (m, 2H), 7.64 – 7.62 (m, 2H), 6.23 (t,  $J = 6.6$  Hz, 1H), 3.36 – 3.32 (m, 4H), 2.87 (dd,  $J = 12.2, 6.5$  Hz, 2H), 2.35 (t,  $J = 8.1$  Hz, 2H), 2.05 – 1.98 (m, 2H), 1.72 – 1.68 (m, 2H).  $^{13}\text{C NMR}$  (126 MHz,  $\text{CDCl}_3$ )  $\delta$  176.23, 139.61, 132.22, 128.63, 127.16, 47.49, 39.63, 39.29, 30.69, 27.01, 17.90. **HRMS (ESI):** Mass calcd for  $\text{C}_{13}\text{H}_{17}\text{BrN}_2\text{O}_3\text{SH}$   $[\text{M}+\text{H}]^+$  : 361.0222; found: 361.0236.

**N-(3-(2-oxoazepan-1-yl)propyl)benzenesulfonamide (11a):**

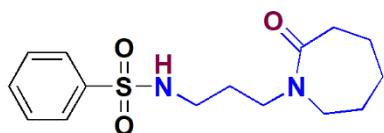

White solid (54 mg, 88%). Melting point: 110-112 °C  $^1\text{H NMR}$  (500 MHz,  $\text{CDCl}_3$ )  $\delta$  7.89 – 7.87 (m, 2H), 7.54 – 7.47 (m, 3H), 6.29 (t,  $J = 6.5$  Hz, 1H), 3.43 – 3.41 (m, 2H), 3.26 – 3.24 (m, 2H), 2.87 (dd,  $J = 12.0, 6.5$  Hz, 2H), 2.46 – 2.44 (m, 2H), 1.70 – 1.65 (m, 4H), 1.59 – 1.53 (m, 4H).  $^{13}\text{C NMR}$  (126 MHz,  $\text{CDCl}_3$ )  $\delta$  177.02, 140.47, 132.21, 128.88, 127.07, 49.65, 44.82, 39.57, 36.91, 29.86, 28.36, 27.54, 23.27. **HRMS (ESI):** Mass calcd for  $\text{C}_{15}\text{H}_{22}\text{N}_2\text{O}_3\text{SH}$   $[\text{M}+\text{H}]^+$  : 311.1429; found: 311.1437.

**4-Methyl-N-(3-(2-oxoazepan-1-yl)propyl)benzenesulfonamide (11b):**

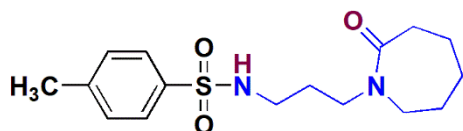

White solid (60 mg, 93%). Melting point: 75-76 °C  $^1\text{H NMR}$  (500 MHz,  $\text{CDCl}_3$ )  $\delta$  7.69 – 7.68 (m, 2H), 7.21 – 7.20 (m, 2H), 6.11 (t,  $J = 6.6$  Hz, 1H), 3.35 – 3.33 (m, 2H), 3.20 – 3.18 (m, 2H), 2.80 – 2.76 (dd,  $J = 12.1, 6.5$  Hz, 2H), 2.40 – 2.37 (m, 2H), 2.34 (s, 3H), 1.63 – 1.57 (m, 4H), 1.52 – 1.47 (m, 4H).  $^{13}\text{C NMR}$  (126 MHz,  $\text{CDCl}_3$ )  $\delta$  176.95, 142.88, 137.49, 129.48, 127.12, 49.65, 44.87, 39.59, 36.92, 29.87, 28.36, 27.54, 23.24, 21.47. **HRMS (ESI):** Mass calcd for  $\text{C}_{16}\text{H}_{24}\text{N}_2\text{O}_3\text{SH}$   $[\text{M}+\text{H}]^+$  : 325.1586; found: 325.1605.

**2-Methyl-N-(3-(2-oxoazepan-1-yl)propyl)benzenesulfonamide (11c):**

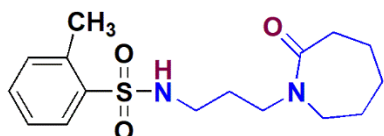

Transparent oil (59 mg, 91%).  $^1\text{H NMR}$  (500 MHz,  $\text{CDCl}_3$ )  $\delta$  7.88 – 7.86 (m, 1H), 7.34 (td,  $J = 7.5, 1.3$  Hz, 1H), 7.22 – 7.20 (m, 2H), 6.25 (t,  $J = 6.6$  Hz, 1H), 3.36 – 3.33 (m, 2H), 3.21 – 3.19 (m, 2H), 2.85 – 2.81 (m, 2H), 2.62 (s, 3H), 2.43 – 2.41



(m, 2H), 1.66 – 1.59 (m, 3H), 1.57 – 1.51 (m, 5H).  $^{13}\text{C}$  NMR (126 MHz,  $\text{CDCl}_3$ )  $\delta$  177.08, 138.87, 137.24, 132.28, 129.02, 127.12, 125.91, 49.63, 44.87, 39.43, 36.98, 29.89, 28.36, 27.93, 23.33, 20.29. HRMS (ESI): Mass calcd for  $\text{C}_{16}\text{H}_{24}\text{N}_2\text{O}_3\text{SH}$   $[\text{M}+\text{H}]^+$  : 325.1586; found: 325.1607.

#### 4-Chloro-N-(3-(2-oxoazepan-1-yl)propyl)benzenesulfonamide (11d):

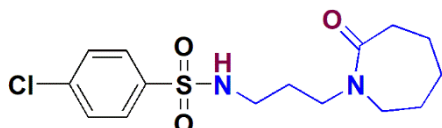

Transparent oil (58 mg, 85%).  $^1\text{H}$  NMR (500 MHz,  $\text{CDCl}_3$ )  $\delta$  7.69 – 7.67 (m, 2H), 7.57 – 7.54 (m, 2H), 6.37 (t,  $J$  = 6.5 Hz, 1H), 3.37 – 3.35 (m, 2H), 3.21 – 3.19 (m, 2H), 2.80 – 2.76 (m, 2H), 2.40 – 2.38 (m, 2H), 1.65 – 1.60 (m, 4H), 1.53 – 1.48 (m, 4H).  $^{13}\text{C}$  NMR (126 MHz,  $\text{CDCl}_3$ )  $\delta$  177.25, 139.58, 132.12, 128.74, 127.06, 49.72, 44.83, 39.49, 36.87, 29.86, 28.33, 27.50, 23.24. HRMS (ESI): Mass calcd for  $\text{C}_{15}\text{H}_{21}\text{ClN}_2\text{O}_3\text{SH}$   $[\text{M}+\text{H}]^+$  : 345.1040; found: 345.1057.

#### 4-Bromo-N-(3-(2-oxoazepan-1-yl)propyl)benzenesulfonamide (11e):

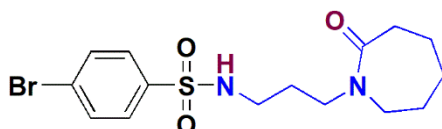

Transparent oil (63 mg, 81%).  $^1\text{H}$  NMR (500 MHz,  $\text{CDCl}_3$ )  $\delta$  7.76 – 7.73 (m, 2H), 7.63 – 7.61 (m, 2H), 6.45 (t,  $J$  = 6.6 Hz, 1H), 3.44 – 3.41 (m, 2H), 3.27 – 3.25 (m, 2H), 2.87 – 2.83 (m, 2H), 2.47 – 2.45 (m, 2H), 1.72 – 1.66 (m, 4H), 1.60 – 1.54 (m, 4H).  $^{13}\text{C}$  NMR (126 MHz,  $\text{CDCl}_3$ )  $\delta$  177.19, 139.59, 132.11, 128.74, 127.05, 49.70, 44.79, 39.47, 36.90, 29.86, 28.35, 27.49, 23.25. HRMS (ESI): Mass calcd for  $\text{C}_{15}\text{H}_{21}\text{BrN}_2\text{O}_3\text{SH}$   $[\text{M}+\text{H}]^+$  : 389.0535; found: 389.0561.

### 6. General procedure for synthesis of aroyl thiourea (14) and amides (15, 16) derivatives with distal cyclic amides functionality.

To a 15 ml vial, aroyl chloride **12** (0.5 mmol, 1 equiv) and KSCN **3** (1.2 equiv) was added and stirred at RT for 1 h. After 1 hr the temperature was increased to 60 °C with subsequent addition of DBN **5** or DBU **6** (1.2 equiv). The reaction mixture was stirred for another 15 minutes and cooled. The compound was extracted with ethyl acetate after washing with water. After drying the organic layer and rotary evaporation the target compounds were purified with column chromatography with 80-90% (DBN as nucleophile) and 80% (DBU as nucleophile) ethyl

acetate/hexane as mobile phase. All the new compounds were characterized via  $^1\text{H}$ NMR,  $^{13}\text{C}$ NMR and HRMS spectroscopy (Note: Compound 16b is earlier reported and only  $^1\text{H}$ NMR and  $^{13}\text{C}$ NMR spectra were attached.<sup>2</sup>)

**1-Benzoyl-3-[3-(2-oxo-pyrrolidin-1-yl)-propyl]-thiourea (14a):**

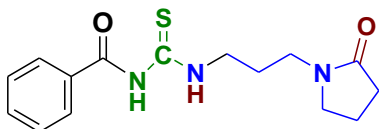

Transparent viscous oil (65 mg, 43%).  $^1\text{H}$  NMR (500 MHz,  $\text{CDCl}_3$ )  $\delta$  10.95 (s, 1H), 9.02 (s, 1H), 7.87 – 7.85 (m, 2H), 7.63 – 7.60 (m, 1H), 7.52 – 7.44 (m, 2H), 3.74 (q,  $J = 6.7$  Hz, 2H), 3.46 – 3.39 (m, 4H), 2.43 (t,  $J = 8.2$  Hz, 2H), 2.09 – 2.03 (m, 2H), 1.96 (dd,  $J = 13.3, 6.7$  Hz, 2H).  $^{13}\text{C}$  NMR (126 MHz,  $\text{CDCl}_3$ )  $\delta$  180.01, 175.73, 166.47, 133.48, 131.82, 129.08, 127.51, 47.37, 43.04, 40.06, 30.85, 25.90, 18.01. Mass calcd for  $\text{C}_{15}\text{H}_{19}\text{N}_3\text{O}_2\text{SNa}$   $[\text{M}+\text{Na}]^+$ : 328.1096; found: 328.1123.

**1-(4-Methoxy-benzoyl)-3-[3-(2-oxo-pyrrolidin-1-yl)-propyl]-thiourea (14b):**

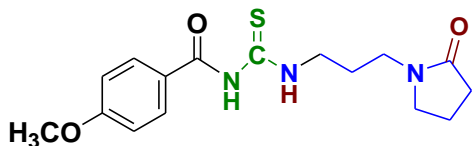

Transparent viscous oil (70 mg, 42%).  $^1\text{H}$  NMR (500 MHz,  $\text{CDCl}_3$ )  $\delta$  10.99 (s, 1H), 8.96 (s, 1H), 7.84 – 7.81 (m, 2H), 6.99 – 6.96 (m, 2H), 3.88 (s, 3H), 3.73 (q,  $J = 6.7$  Hz, 2H), 3.46 – 3.39 (m, 4H), 2.43 (t,  $J = 8.1$  Hz, 2H), 2.05 (dd,  $J = 15.3, 7.6$  Hz, 2H), 1.96 – 1.94 (m, 2H).  $^{13}\text{C}$  NMR (126 MHz,  $\text{CDCl}_3$ )  $\delta$  180.16, 175.68, 165.92, 163.83, 129.68, 123.74, 114.33, 55.59, 47.36, 43.01, 40.07, 30.86, 25.95, 18.01. Mass calcd for  $\text{C}_{16}\text{H}_{21}\text{N}_3\text{O}_3\text{SNa}$   $[\text{M}+\text{Na}]^+$ : 358.1201; found: 358.1232.

**N-[3-(2-Oxo-pyrrolidin-1-yl)-propyl]-benzamide (15a):**

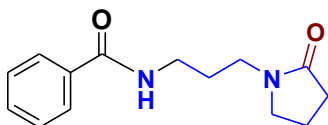

White semisolid (55 mg, 45%).  $^1\text{H}$  NMR (500 MHz,  $\text{CDCl}_3$ )  $\delta$  7.94 – 7.92 (m, 2H), 7.81 (s, 1H), 7.49 – 7.42 (m, 3H), 3.44 – 3.39 (m, 6H), 2.46 – 2.43 (m, 2H), 2.11 – 2.06 (m, 2H), 1.80 – 1.77 (m, 2H).  $^{13}\text{C}$  NMR (126 MHz,  $\text{CDCl}_3$ )  $\delta$  176.35, 167.09, 134.35, 131.28, 128.49, 127.09, 47.47, 39.58, 35.57, 30.90, 26.21, 17.95. Mass calcd for  $\text{C}_{14}\text{H}_{18}\text{N}_2\text{O}_2\text{Na}$   $[\text{M}+\text{Na}]^+$ : 269.1266; found: 269.1295.

#### 4-Methoxy-N-[3-(2-oxo-pyrrolidin-1-yl)-propyl]-benzamide (15b):

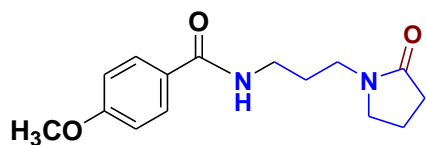

White semisolid (59 mg, 43%).  $^1\text{H NMR}$  (500 MHz,  $\text{CDCl}_3$ )  $\delta$  7.91 – 7.88 (m, 2H), 7.70 (s, 1H), 6.95 – 6.92 (m, 2H), 3.84 (s, 3H), 3.44 – 3.38 (m, 6H), 2.45 (t,  $J = 8.1$  Hz, 2H), 2.10 – 2.04 (m, 2H), 1.78 (dq,  $J = 12.0, 6.0$  Hz, 2H).  $^{13}\text{C NMR}$  (126 MHz,  $\text{CDCl}_3$ )  $\delta$  176.31, 166.70, 162.04, 128.90, 126.78, 113.67, 55.35, 47.45, 39.58, 35.49, 30.92, 26.21, 17.95. Mass calcd for  $\text{C}_{15}\text{H}_{20}\text{N}_2\text{O}_2\text{Na}$   $[\text{M}+\text{Na}]^+$ : 299.1372; found: 299.1400.

#### N-[3-(2-Oxo-azepan-1-yl)-propyl]-benzamide (16a):

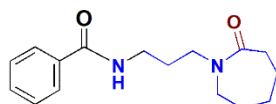

White semisolid (122 mg, 87%).  $^1\text{H NMR}$  (500 MHz,  $\text{CDCl}_3$ )  $\delta$  7.97 (s, 1H), 7.94 – 7.91 (m, 2H), 7.48 – 7.41 (m, 3H), 3.53 – 3.50 (m, 2H), 3.42 (dd,  $J = 11.9, 6.1$  Hz, 2H), 3.37 – 3.35 (m, 2H), 2.60 – 2.57 (m, 2H), 1.77 – 1.66 (m, 8H).  $^{13}\text{C NMR}$  (126 MHz,  $\text{CDCl}_3$ )  $\delta$  176.36, 167.07, 134.37, 131.27, 128.49, 127.09, 47.46, 44.25, 39.55, 35.52, 30.90, 29.70, 26.19, 17.97. **HRMS (ESI)**: Mass calcd for  $\text{C}_{16}\text{H}_{23}\text{N}_2\text{O}_2\text{H}$   $[\text{M}+\text{H}]^+$ : 275.1760; found: 275.1774.

#### 4-Methoxy-N-[3-(2-oxo-azepan-1-yl)-propyl]-benzamide (16b):

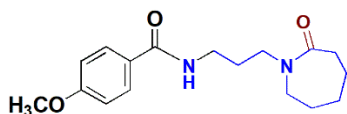

White semisolid (131 mg, 86%).  $^1\text{H NMR}$  (500 MHz,  $\text{CDCl}_3$ )  $\delta$  7.84 – 7.80 (m, 3H), 6.86 – 6.84 (m, 2H), 3.75 (s, 3H), 3.44 – 3.41 (m, 2H), 3.32 (dd,  $J = 11.9, 6.1$  Hz, 2H), 3.28 – 3.26 (m, 2H), 2.51 – 2.48 (m, 2H), 1.68 – 1.58 (m, 8H).  $^{13}\text{C NMR}$  (126 MHz,  $\text{CDCl}_3$ )  $\delta$  177.26, 166.56, 161.92, 128.85, 126.95, 113.61, 55.31, 49.55, 44.99, 37.10, 35.31, 29.89, 28.33, 27.09, 23.41.

### 7. Conversion of $\beta$ -thiouredo sulfides to $\beta$ -uredo sulfide derivatives.

In a 15 ml vial containing  $\beta$ -thiouredo sulfide **7d** (43 mg, 0.1 mmol, 1 equiv) was added tosyl chloride **9b**. Further varied solvents were evaluated for  $\beta$ -thiouredo sulfide to  $\beta$ -uredo sulfide

transformation by stirring at different temperature conditions. Completion of reaction was confirmed from TLC. After completion of reaction the solvent was rotary-evaporated and the compound was extracted with ethyl acetate upon washing with water. The organic layer was dried over anhydrous sodium sulphate and concentrated under reduced pressure. The compound was then purified with 75% ethyl acetate/hexane solvent using silica gel column chromatography. The product was elucidated with NMR and HRMS spectroscopy.

**Table S5: Evaluation of sulfonyl chloride equivalents, solvent, temperature and reaction time conditions for  $\beta$ -thiouredo sulfides to  $\beta$ -uredo sulfides transformations**

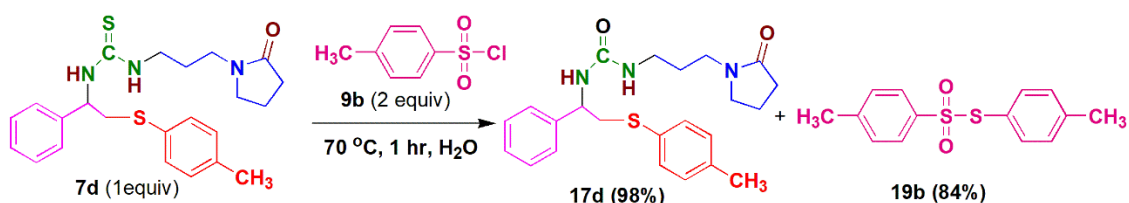

| Sr. No. | Tosyl chloride (9b) equiv | Solvent              | Temp ( $^\circ\text{C}$ ) | Time (hr) | % Yield 17d   | % Yield 19b   |
|---------|---------------------------|----------------------|---------------------------|-----------|---------------|---------------|
| 1.      | 1                         | $\text{H}_2\text{O}$ | 60                        | 3         | 20            | Trace         |
| 2.      | 1                         | THF                  | 60                        | 3         | No conversion | No conversion |
| 3.      | 1                         | Ethyl acetate        | 60                        | 3         | No conversion | No conversion |
| 4.      | 1                         | Toluene              | 60                        | 3         | No conversion | No conversion |
| 5.      | 1                         | DCE                  | 60                        | 7         | 22            | trace         |
| 6.      | 1                         | $\text{H}_2\text{O}$ | 65                        | 3         | 32            | trace         |
| 7.      | 1                         | $\text{H}_2\text{O}$ | 70                        | 2         | 43            | 20            |
| 8.      | 1                         | $\text{H}_2\text{O}$ | 75                        | 2         | 43            | 18            |
| 9.      | 1.2                       | $\text{H}_2\text{O}$ | 70                        | 2         | 44            | 20            |
| 10.     | 1.5                       | $\text{H}_2\text{O}$ | 70                        | 2         | 62            | 45            |
| 11.     | 2.0                       | $\text{H}_2\text{O}$ | 70                        | 1         | 98            | 84            |
| 12.     | 2.5                       | $\text{H}_2\text{O}$ | 70                        | 1         | 97            | 84            |
| 13.     | 2                         | DCE                  | 70                        | 10        | 94            | 81            |

**7d** (0.1 mmol, 1equiv), Note-The reaction was stirred till the reactant conversion ceased or reactant spot completely disappears from TLC.

### 8. One pot approach for $\beta$ -uredo sulfide **17d** from $\beta$ -isothiocyanato sulfide **4d**.

$\beta$ -isothiocyanato sulfide **4d** (29 mg, 0.1 mmol, 1 equiv) containing in a 15 ml vial was added DBN (0.12 mmol, 1.2 equiv) solution in 1 ml water or DCE. Then the reaction mixture was stirred at 60 °C for 0.5 hr. After this tosyl chloride (0.2 mmol, 2 equiv) was added and the temperature of reaction was increased to 70 °C. Subsequent stirring with constant monitoring using TLC results in reaction completion. The reaction mixture was cooled to room temperature. Later the product was washed with water and extracted with ethyl acetate. The ethyl acetate containing product was dried over anhydrous sodium sulphate and filtered. After rota evaporating the ethyl acetate, the product was extracted using silica gel chromatography with 75% ethyl acetate/hexane as mobile phase.

**Table S6: Evaluation of solvent and reaction time for *in-situ* conversion of  $\beta$ -thiouredo sulfides to  $\beta$ -uredo sulfides.**

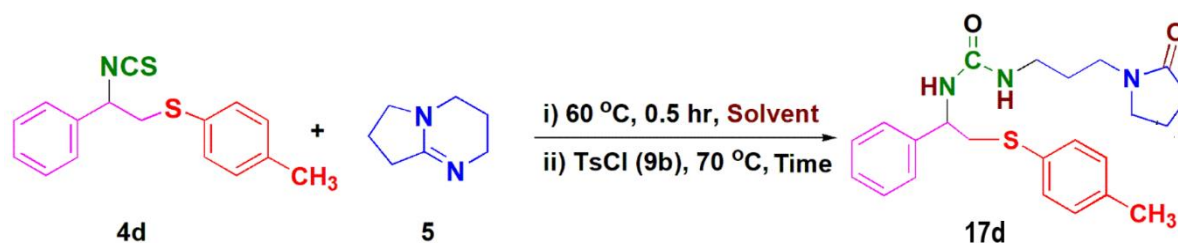

| Sr. No. | Solvent          | Temp (°C) | Time (hr) | % Yield <b>17d</b> |
|---------|------------------|-----------|-----------|--------------------|
| 1.      | H <sub>2</sub> O | 70        | 1.5       | 94                 |
| 2.      | DCE              | 70        | 10        | 92                 |

**4b** (0.1 mmol, 1 equiv), **5** (1.2 equiv), **9b** (2 equiv)

### 9. General procedure for $\beta$ -uredo sulfides derivatives **17** and **18** from $\beta$ -isothiocyanato sulfides **4**.

In a 15 ml vial containing  $\beta$ -isothiocyanato sulfide **4** (0.1 mmol, 1 equiv) and stir bar was added DBN or DBU (0.12 mmol, 1.2 equiv) solution in 1 ml water. Then the reaction mixture was stirred at 60 °C for 0.5 hr. After this tosyl chloride (0.2 mmol, 2 equiv) was added and the temperature of reaction was increased to 70 °C with constant stirring for 1 hr. After completion the reaction mixture was cooled to room temperature. This was followed with the extraction of

product was with ethyl acetate and washing with water. The organic layer was collected and dried over anhydrous sodium sulphate. After filtration and rota evaporating the ethyl acetate, the product was extracted using silica gel chromatography with 75% or 85% ethyl acetate/hexane solution.

**1-(1-(4-Chlorophenyl)-2-(phenylthio)ethyl)-3-(3-(2-oxopyrrolidin-1-yl)propyl)urea (17c):**

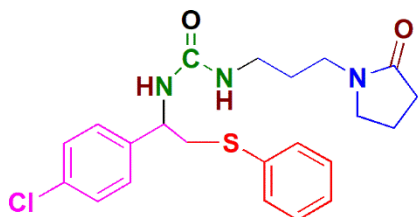

White semisolid (39 mg, 90%). **<sup>1</sup>H NMR (500 MHz, CDCl<sub>3</sub>)** δ 7.34 – 7.32 (m, 2H), 7.28 – 7.27 (m, 1H), 7.26-7.25 (m, 3H), 7.24 – 7.22 (m, 2H), 7.19 – 7.16 (m, 1H), 5.61 (s, 1H), 5.29 (d, *J* = 6.05 Hz, 1H), 4.95 (q, *J* = 6.5 Hz, 1H), 3.37 – 3.34 (m, 2H), 3.33 – 3.31 (m, 1H), 3.28 (t, *J* = 6.2 Hz, 2H), 3.25-3.21 (m, 1H), 3.14-3.06 (m, 2H), 2.39 (td, *J* = 7.8, 1.9 Hz, 2H), 2.06 – 2.01 (m, 2H), 1.66 – 1.60 (m, 2H). **<sup>13</sup>C NMR (126 MHz, CDCl<sub>3</sub>)** δ 175.90, 157.37, 140.20, 135.50, 133.24, 129.92, 129.03, 128.71, 128.04, 126.46, 53.19, 47.35, 40.79, 39.51, 36.32, 30.97, 26.85, 17.88. **HRMS (ESI):** Mass calcd for C<sub>22</sub>H<sub>26</sub>ClN<sub>3</sub>O<sub>2</sub>SH [M+H]<sup>+</sup> : 432.1513; found: 432.1516.

**1-(2-(p-Tolylthio)-1-phenylethyl)-3-(3-(2-oxopyrrolidin-1-yl)propyl)urea (17d):**

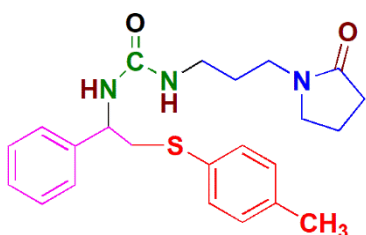

White semisolid (39 mg, 94%). **<sup>1</sup>H NMR (500 MHz, CDCl<sub>3</sub>)** δ 7.32 – 7.27 (m, 5H), 7.25 – 7.22 (m, 2H), 7.07 (d, *J* = 7.95 Hz, 2H), 5.46 (s, 1H), 5.11 (d, *J* = 6.05 Hz, 1H), 4.91 (q, *J* = 6.6 Hz, 1H), 3.35 (t, *J* = 7.1 Hz, 2H), 3.31 – 3.21 (m, 4H), 3.15 – 3.07 (m, 2H), 2.38 (td, *J* = 7.9, 2.6 Hz, 2H), 2.30 (s, 3H), 2.02 (tt, *J* = 13.9, 6.9 Hz, 2H), 1.63 – 1.60 (m, 2H). **<sup>13</sup>C NMR (126 MHz, CDCl<sub>3</sub>)** δ 176.09, 157.91, 141.06, 135.70, 129.87, 129.00, 128.70, 127.76, 126.65, 126.37, 54.16, 47.59, 40.80, 39.73, 36.95, 30.98, 29.70, 27.22, 17.89. **HRMS (ESI):** Mass calcd for C<sub>23</sub>H<sub>29</sub>N<sub>3</sub>O<sub>2</sub>SH [M+H]<sup>+</sup> : 412.2059; found: 412.2077.

**1-(2-(p-Tolylthio)-1-p-tolyethyl)-3-(3-(2-oxopyrrolidin-1-yl)propyl)urea (17i):**

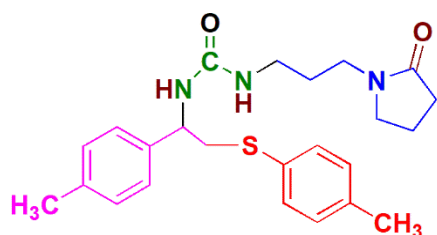

White semisolid (41 mg, 96%).  $^1\text{H NMR}$  (500 MHz,  $\text{CDCl}_3$ )  $\delta$  7.27 (d,  $J = 1.8$  Hz, 1H), 7.25 (d,  $J = 2.2$  Hz, 1H), 7.17 (d,  $J = 8.1$  Hz, 2H), 7.11 (d,  $J = 7.9$  Hz, 2H), 7.07 (d,  $J = 7.9$  Hz, 2H), 5.43 (s, 1H), 5.12 (d,  $J = 6.2$  Hz, 1H), 4.87 (q,  $J = 6.5$  Hz, 1H), 3.35 (t,  $J = 7.1$  Hz, 2H), 3.31 – 3.25 (m, 3H), 3.22 – 3.18 (m, 1H), 3.11 – 3.10 (m, 2H), 2.40 – 2.36 (m, 2H), 2.31 (s, 3H), 2.30 (s, 3H), 2.04 – 1.98 (m, 2H), 1.63 – 1.59 (m, 2H).  $^{13}\text{C NMR}$  (126 MHz,  $\text{CDCl}_3$ )  $\delta$  175.77, 157.47, 138.57, 137.22, 136.42, 132.02, 130.51, 129.75, 129.32, 126.49, 53.53, 47.32, 41.55, 39.57, 36.47, 30.96, 26.94, 21.10, 21.02, 17.90. **HRMS (ESI):** Mass calcd for  $\text{C}_{24}\text{H}_{31}\text{N}_3\text{O}_2\text{SH}$   $[\text{M}+\text{H}]^+$  : 426.2215; found: 426.2231.

**1-(1-(4-Chlorophenyl)-2-(phenylthio)ethyl)-3-(3-(2-oxoazepan-1-yl)propyl)urea (18c):**

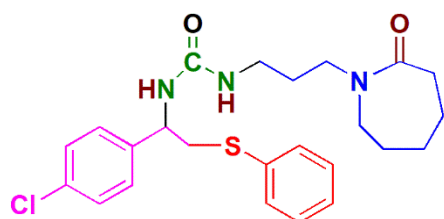

White semisolid (42 mg, 91%).  $^1\text{H NMR}$  (500 MHz,  $\text{CDCl}_3$ )  $\delta$  7.34 – 7.33 (m, 2H), 7.27 – 7.22 (m, 6H), 7.19 – 7.16 (m, 1H), 5.81 (s, 1H), 5.17 (s, 1H), 4.95 (d,  $J = 5.0$  Hz, 1H), 3.39 – 3.36 (m, 2H), 3.34 – 3.29 (m, 3H), 3.24 – 3.20 (m, 1H), 3.15 – 3.08 (m, 2H), 2.52 – 2.50 (m, 2H), 1.76 – 1.72 (m, 2H), 1.67 – 1.57 (m, 6H).  $^{13}\text{C NMR}$  (126 MHz,  $\text{CDCl}_3$ )  $\delta$  174.44, 157.11, 142.55, 135.11, 132.40, 129.55, 128.72, 128.12, 126.89, 126.54, 52.56, 48.40, 44.82, 36.70, 36.45, 29.12, 28.51, 28.26, 22.95, 20.40. **HRMS (ESI):** Mass calcd for  $\text{C}_{24}\text{H}_{30}\text{ClN}_3\text{O}_2\text{SH}$   $[\text{M}+\text{H}]^+$  : 460.1826; found: 460.1838.

**1-(2-(p-Tolylthio)-1-phenylethyl)-3-(3-(2-oxoazepan-1-yl)propyl)urea (18d):**

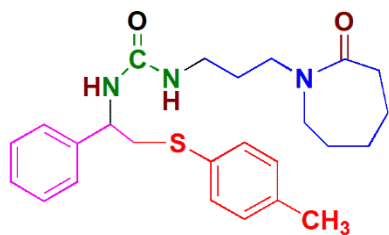

White semisolid (41 mg, 93%). **<sup>1</sup>H NMR (500 MHz, DMSO)**  $\delta$  7.34 – 7.28 (m, 4H), 7.26 – 7.23 (m, 3H), 7.12 (d,  $J = 7.9$  Hz, 2H), 6.61 (d,  $J = 8.3$  Hz, 1H), 5.93 (t,  $J = 5.8$  Hz, 1H), 4.79 (q,  $J = 7.65$  Hz, 1H), 3.32 – 3.30 (m, 2H), 3.29 – 3.23 (m, 3H), 3.21 – 3.17 (m, 1H), 2.98 – 2.91 (m, 2H), 2.42 – 2.38 (m, 2H), 2.27 (s, 3H), 1.65 – 1.62 (m, 2H), 1.55 – 1.47 (m, 6H). **<sup>13</sup>C NMR (126 MHz, DMSO)**  $\delta$  176.75, 157.47, 138.62, 137.16, 136.35, 132.10, 130.47, 129.73, 129.29, 126.54, 53.50, 49.53, 45.04, 41.48, 37.20, 36.23, 29.94, 28.40, 27.73, 23.41, 21.10. **HRMS (ESI):** Mass calcd for C<sub>25</sub>H<sub>33</sub>N<sub>3</sub>O<sub>2</sub>SH [M+H]<sup>+</sup> : 440.2372; found: 440.2378.

#### 1-(2-(o-Tolylthio)-1-phenylethyl)-3-(3-(2-oxoazepan-1-yl)propyl)urea (18g):

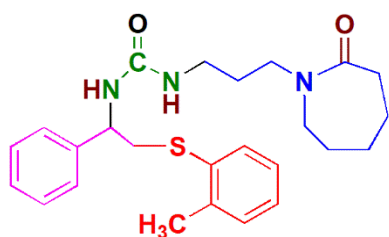

White semisolid (42 mg, 95%). **<sup>1</sup>H NMR (500 MHz, CDCl<sub>3</sub>)**  $\delta$  7.37 (d,  $J = 7.7$  Hz, 1H), 7.31 – 7.27 (m, 4H), 7.26 – 7.22 (m, 1H), 7.13 (d,  $J = 7.1$  Hz, 1H), 7.09 – 7.06 (m, 1H), 5.71 (t,  $J = 5.9$  Hz, 1H), 5.17 (d,  $J = 6.8$  Hz, 1H), 4.97 (q,  $J = 6.9$  Hz, 1H), 3.38 – 3.34 (m, 2H), 3.33 – 3.28 (m, 3H), 3.25 – 3.21 (m, 1H), 3.17 – 3.09 (m, 2H), 2.52 – 2.50 (m, 2H), 2.32 (s, 3H), 1.74 – 1.72 (m, 3H), 1.68 – 1.66 (m, 2H), 1.64 – 1.58 (m, 3H). **<sup>13</sup>C NMR (126 MHz, CDCl<sub>3</sub>)**  $\delta$  176.86, 157.47, 141.64, 138.07, 135.17, 130.11, 129.09, 128.59, 127.54, 126.65, 126.55, 126.09, 53.77, 49.54, 45.06, 40.17, 37.17, 36.20, 29.70, 28.38, 27.70, 23.40, 20.50. **HRMS (ESI):** Mass calcd for C<sub>25</sub>H<sub>33</sub>N<sub>3</sub>O<sub>2</sub>SH [M+H]<sup>+</sup>: 440.2372; found: 440.2390.

#### 10. General procedure for $\beta$ -thiouredo sulfide (7d) mediated transformation of sulfonyl chloride to thiosulfonates.

The mixture of sulfonyl chloride **9** (0.2 mmol, 2 equiv) and  $\beta$ -thiouredo sulfide **7d** (0.1 mmol, 1 equiv) in a 15 ml vial was added 1 ml water and stirred for 1 hr at 70 °C. After completion the reaction mixture was cooled and compound was extracted with ethyl acetate. The organic layer was dried over anhydrous sodium sulphate and concentrated under vacuum. Finally, the



residue was purified with 8% ethyl acetate/hexane solvent system with silica gel column chromatography. All the synthesized derivatives **19a-e** were characterized via  $^1\text{H}$  and  $^{13}\text{C}$  NMR spectroscopy and their data were further reconfirmed from previous literature.<sup>3</sup>

**S-phenyl benzenesulfonylthioate (19a):**

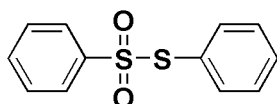

Transparent oil (22 mg, 87%).  $^1\text{H}$  NMR (500 MHz,  $\text{CDCl}_3$ )  $\delta$  7.79 – 7.77 (m, 1H), 7.71 – 7.69 (m, 1H), 7.57 (dd,  $J$  = 7.0, 1.7 Hz, 2H), 7.47 (ddt,  $J$  = 8.7, 6.9, 1.8 Hz, 1H), 7.44 – 7.40 (m, 1H), 7.37 – 7.32 (m, 4H).  $^{13}\text{C}$  NMR (126 MHz,  $\text{CDCl}_3$ )  $\delta$  136.61, 133.62, 132.58, 131.41, 129.44, 129.32, 128.80, 127.58.

**S-p-tolyl 4-methylbenzenesulfonylthioate (19b):**

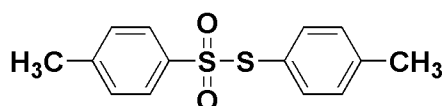

White solid (23 mg, 84%). Melting point: 74-76 °C.  $^1\text{H}$  NMR (500 MHz,  $\text{CDCl}_3$ )  $\delta$  7.46 (d,  $J$  = 8.3 Hz, 2H), 7.25 – 7.20 (m, 4H), 7.14 (d,  $J$  = 8.0 Hz, 2H), 2.42 (s, 3H), 2.38 (s, 3H).  $^{13}\text{C}$  NMR (126 MHz,  $\text{CDCl}_3$ )  $\delta$  144.56, 142.04, 140.51, 136.51, 130.20, 129.36, 127.62, 124.63, 21.65, 21.48.

**S-o-tolyl 2-methylbenzenesulfonylthioate (19c):**

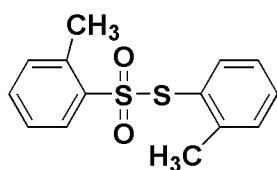

Transparent oil (22 mg, 83%).  $^1\text{H}$  NMR (500 MHz,  $\text{CDCl}_3$ )  $\delta$  7.47 – 7.46 (m, 2H), 7.25 – 7.21 (m, 4H), 7.14 (d,  $J$  = 7.9 Hz, 2H), 2.42 (s, 3H), 2.38 (s, 3H).  $^{13}\text{C}$  NMR (126 MHz,  $\text{CDCl}_3$ )  $\delta$  144.61, 144.56, 142.04, 140.52, 136.51, 130.70, 130.20, 129.94, 129.36, 129.07, 127.62, 124.63, 21.65, 21.47.

**S-4-chlorophenyl 4-chlorobenzenesulfonylthioate (19d):**

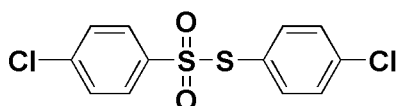

White solid (27 mg, 84%). Melting point: 134-135 °C. <sup>1</sup>H NMR (500 MHz, CDCl<sub>3</sub>) δ 7.61 – 7.59 (m, 2H), 7.54 – 7.50 (m, 2H), 7.47 – 7.43 (m, 2H), 7.25 – 7.23 (m, 2H). <sup>13</sup>C NMR (126 MHz, CDCl<sub>3</sub>) δ 137.84, 132.94, 132.30, 129.20, 128.96, 127.04, 126.63, 124.32.

#### S-4-bromophenyl 4-bromobenzenesulfonylthioate (19e):

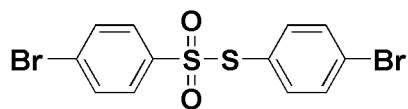

White solid (34 mg, 83%). Melting point: 148-149 °C. <sup>1</sup>H NMR (500 MHz, CDCl<sub>3</sub>) δ 7.59 – 7.56 (m, 2H), 7.49 – 7.45 (m, 1H), 7.43 – 7.40 (m, 2H), 7.37 – 7.32 (m, 3H). <sup>13</sup>C NMR (126 MHz, CDCl<sub>3</sub>) δ 143.00, 136.61, 133.62, 131.41, 129.44, 128.80, 127.87, 127.58.

### 11. Mechanistic studies:

**11.1 Radical trapping experiment with TEMPO:** To a 15 ml vial with a stir bar were added diphenyl disulphide **1** (0.1 mmol, 0.5 equiv), styrene **2a** (0.24 mmol, 1.2 equiv), potassium thiocyanate **3** (0.22 mmol, 1.1 equiv), iodine (0.2 mmol, 1 equiv) and TEMPO (0.6 mmol, 3 equiv). This was followed with the addition of water (1 ml) and the reaction mixture was stirred in open atmosphere at 60 °C. The reaction was stirred and monitored with TLC. However constant TLC monitoring revealed no product formation till 5 hr. After completion the reaction mixture was submitted for HRMS and TEMPO adduct **20** was confirmed. **HRMS (ESI):** Mass calcd for C<sub>24</sub>H<sub>33</sub>NOSH [M+H]<sup>+</sup>: 384.2361; found: 384.2383.

**11.2 Radical scavenging experiment with BHT:** To a 15 ml vial with a stir bar were added diphenyl disulphide **1** (0.1 mmol, 0.5 equiv), styrene **2a** (0.24 mmol, 1.2 equiv), potassium thiocyanate **3** (0.22 mmol, 1.1 equiv), iodine (0.2 mmol, 1 equiv) and BHT (0.4 mmol, 2 equiv). This was followed with the addition of water (1 ml) and the reaction mixture was stirred in open atmosphere at 60 °C. The reaction was stirred and monitored with TLC. After completion of reaction the saturated solution of sodium thiosulfate in water was added to the reaction mixture. The compound was extracted with ethyl acetate and dried over anhydrous sodium sulphate followed by filtration. Ethyl acetate was rota-evaporated under vacuum and the product of the reaction, β-isothiocyanato sulfide **4d** was purified using silica gel column chromatography with 2% ethyl acetate/hexane. The product was confirmed by NMR and HRMS spectroscopy.

**11.3 Investigation for H<sub>2</sub>O mediated ring opening of DBN:** A two necked RBF containing stir bar was vacuum dried and N<sub>2</sub> was flushed in the system.  $\beta$ -isothiocyanato sulfide **4d** (0.1 mmol, 1 equiv) and DBN (0.12 mmol, 1.2 equiv) was added in the presence of N<sub>2</sub>. Further, dried DCE (2 ml) was added to the RBF and stirred at 60 °C. The reaction progress was monitored with TLC. However, the reaction yields no product.

**11.4 Investigation for role of H<sub>2</sub>O in  $\beta$ -thiouredo sulfide to  $\beta$ -uredo sulfide conversion:** Thiourea **7d** (0.1 mmol, 1 equiv) was added to a vacuum dried two necked RBF containing stir bar. N<sub>2</sub> was flushed in the system followed by the addition of tosyl chloride **9b** (0.2 mmol, 2 equiv), dried DCE (2 ml) and stirred at 70 °C. The reaction progress was monitored with TLC. However, no transformation was obtained.

**11.5 Investigations for  $\beta$ -thiouredo sulfide to  $\beta$ -uredo sulfide conversion in other sulfonyl sources**

In a 15 ml vial containing thiourea **7d** (0.1 mmol, 1 equiv) in 1 ml H<sub>2</sub>O was added DMSO (SO<sub>2</sub>Cl<sub>2</sub>) or benzyl sulfonyl chloride (PhCH<sub>2</sub>SO<sub>2</sub>Cl) (0.2 mmol, 2 equiv). The reaction was stirred at 70 °C and progress of reaction was monitored by TLC. However, no product was obtained.

**11.6 Investigations for  $\beta$ -thiouredo sulfide to  $\beta$ -uredo sulfide conversion in other sulfonyl sources**

$\beta$ -thiouredo sulfides **21** (0.1 mmol, 1 equiv) and tosyl chloride (0.2 mmol, 2 equiv) contained in 15 ml vial with magnetic stirred bar was added 1 ml H<sub>2</sub>O. The reaction was stirred at 70 °C. However, TLC revealed no transformation till 5 hr.

## 12. <sup>1</sup>H and <sup>13</sup>C NMR Spectra

### <sup>1</sup>H and <sup>13</sup>C NMR for 4a

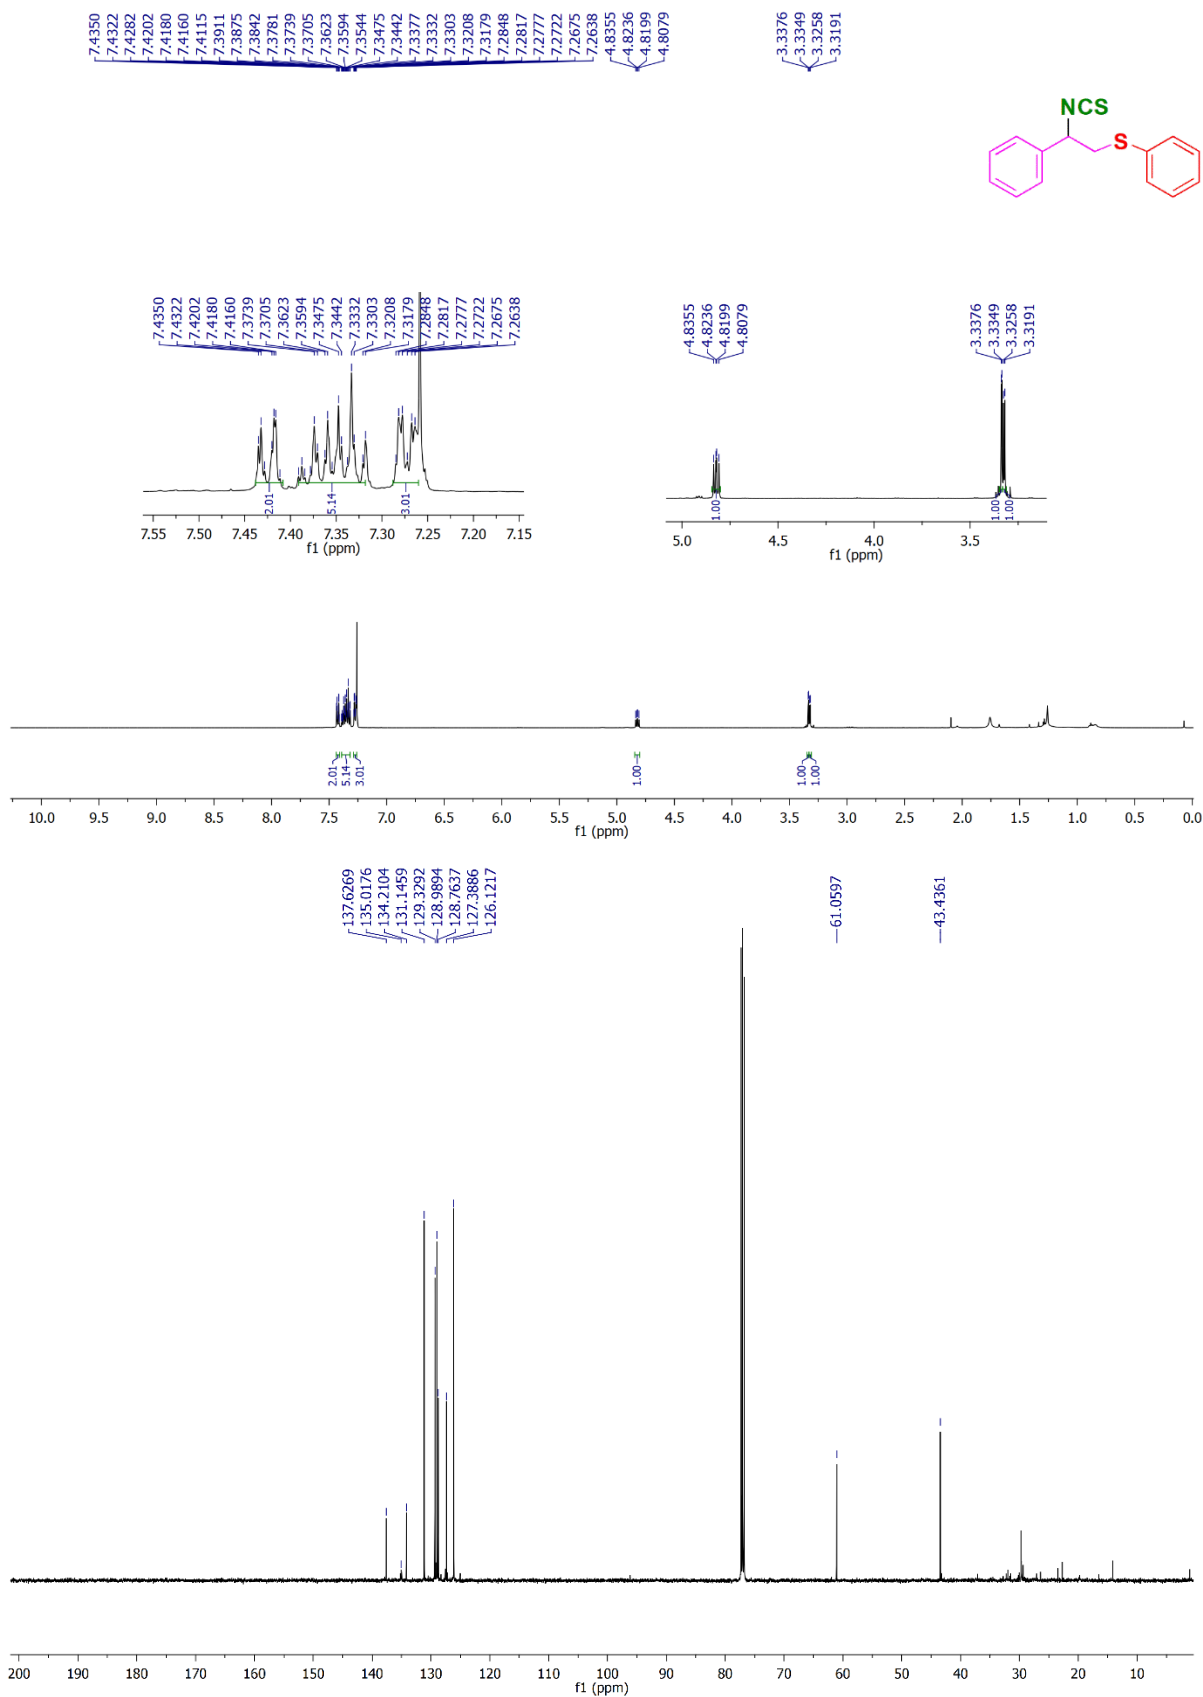

# $^1\text{H}$ and $^{13}\text{C}$ NMR for 4c

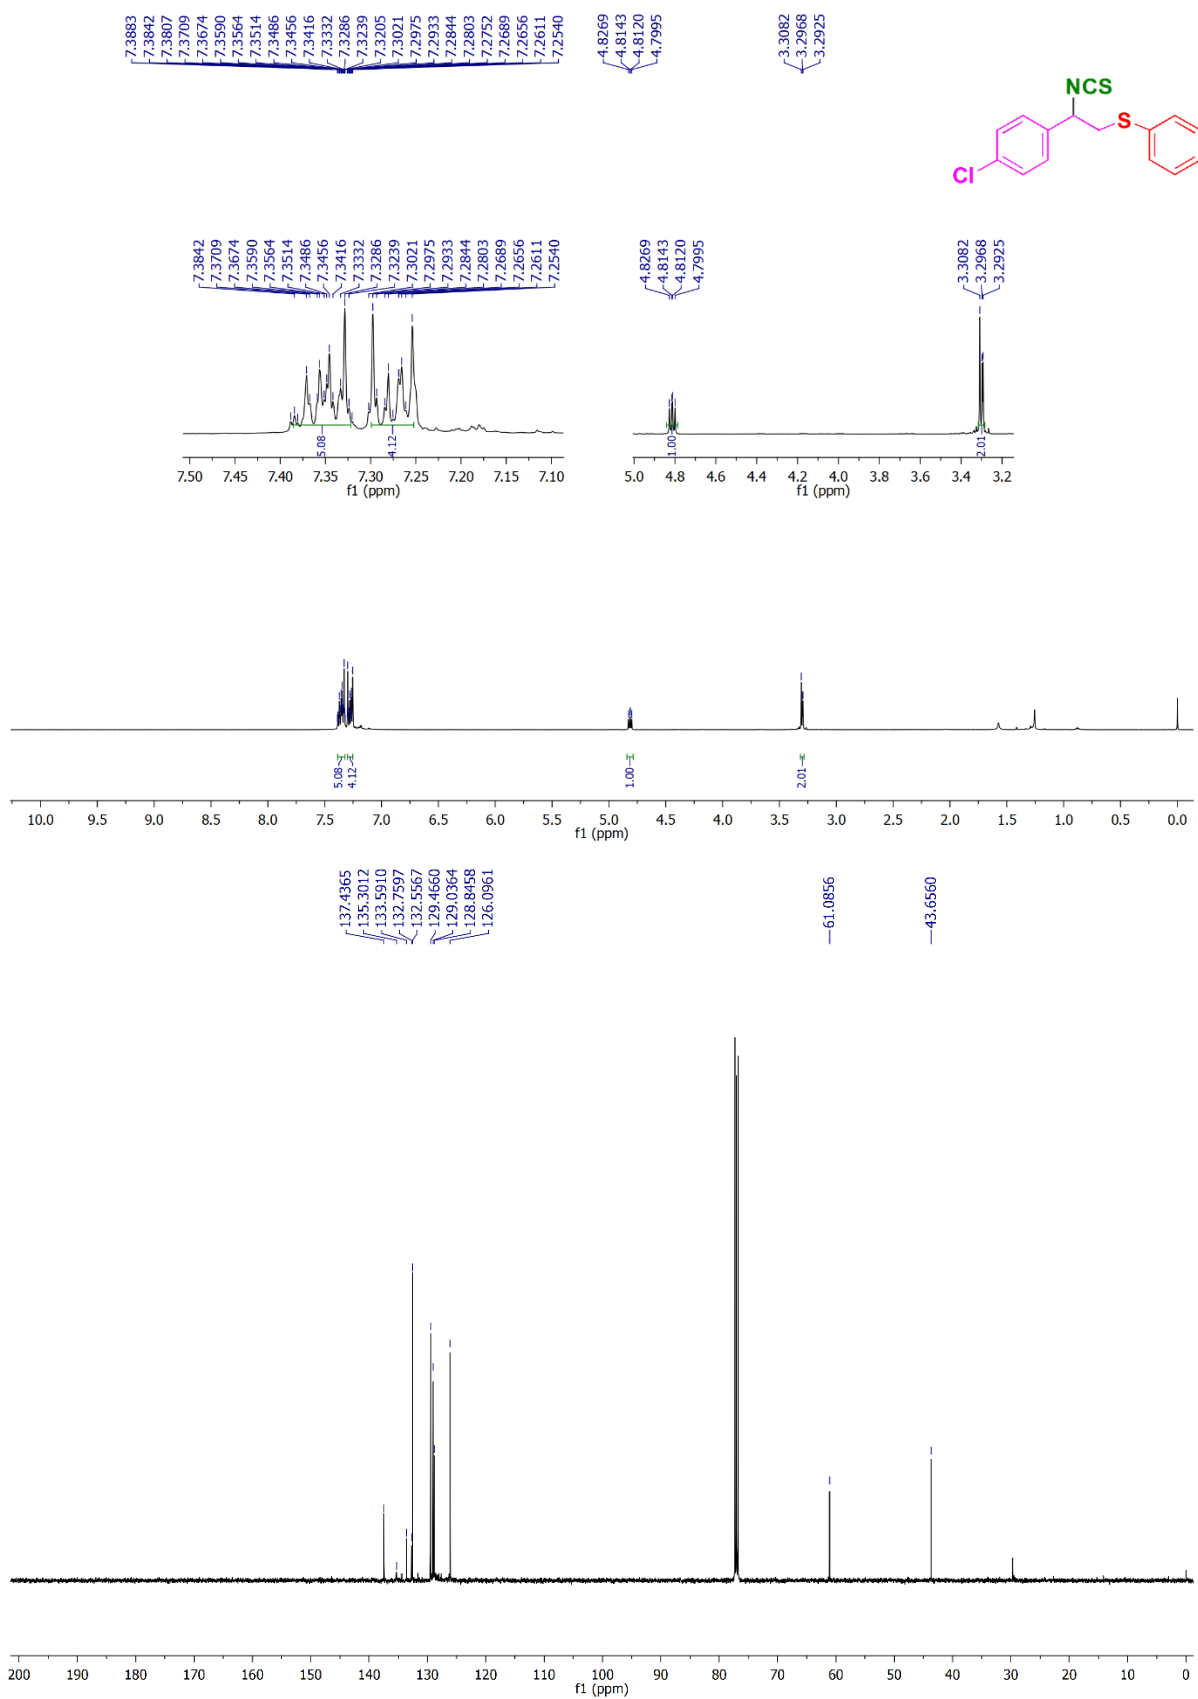

# $^1\text{H}$ and $^{13}\text{C}$ NMR for 4d

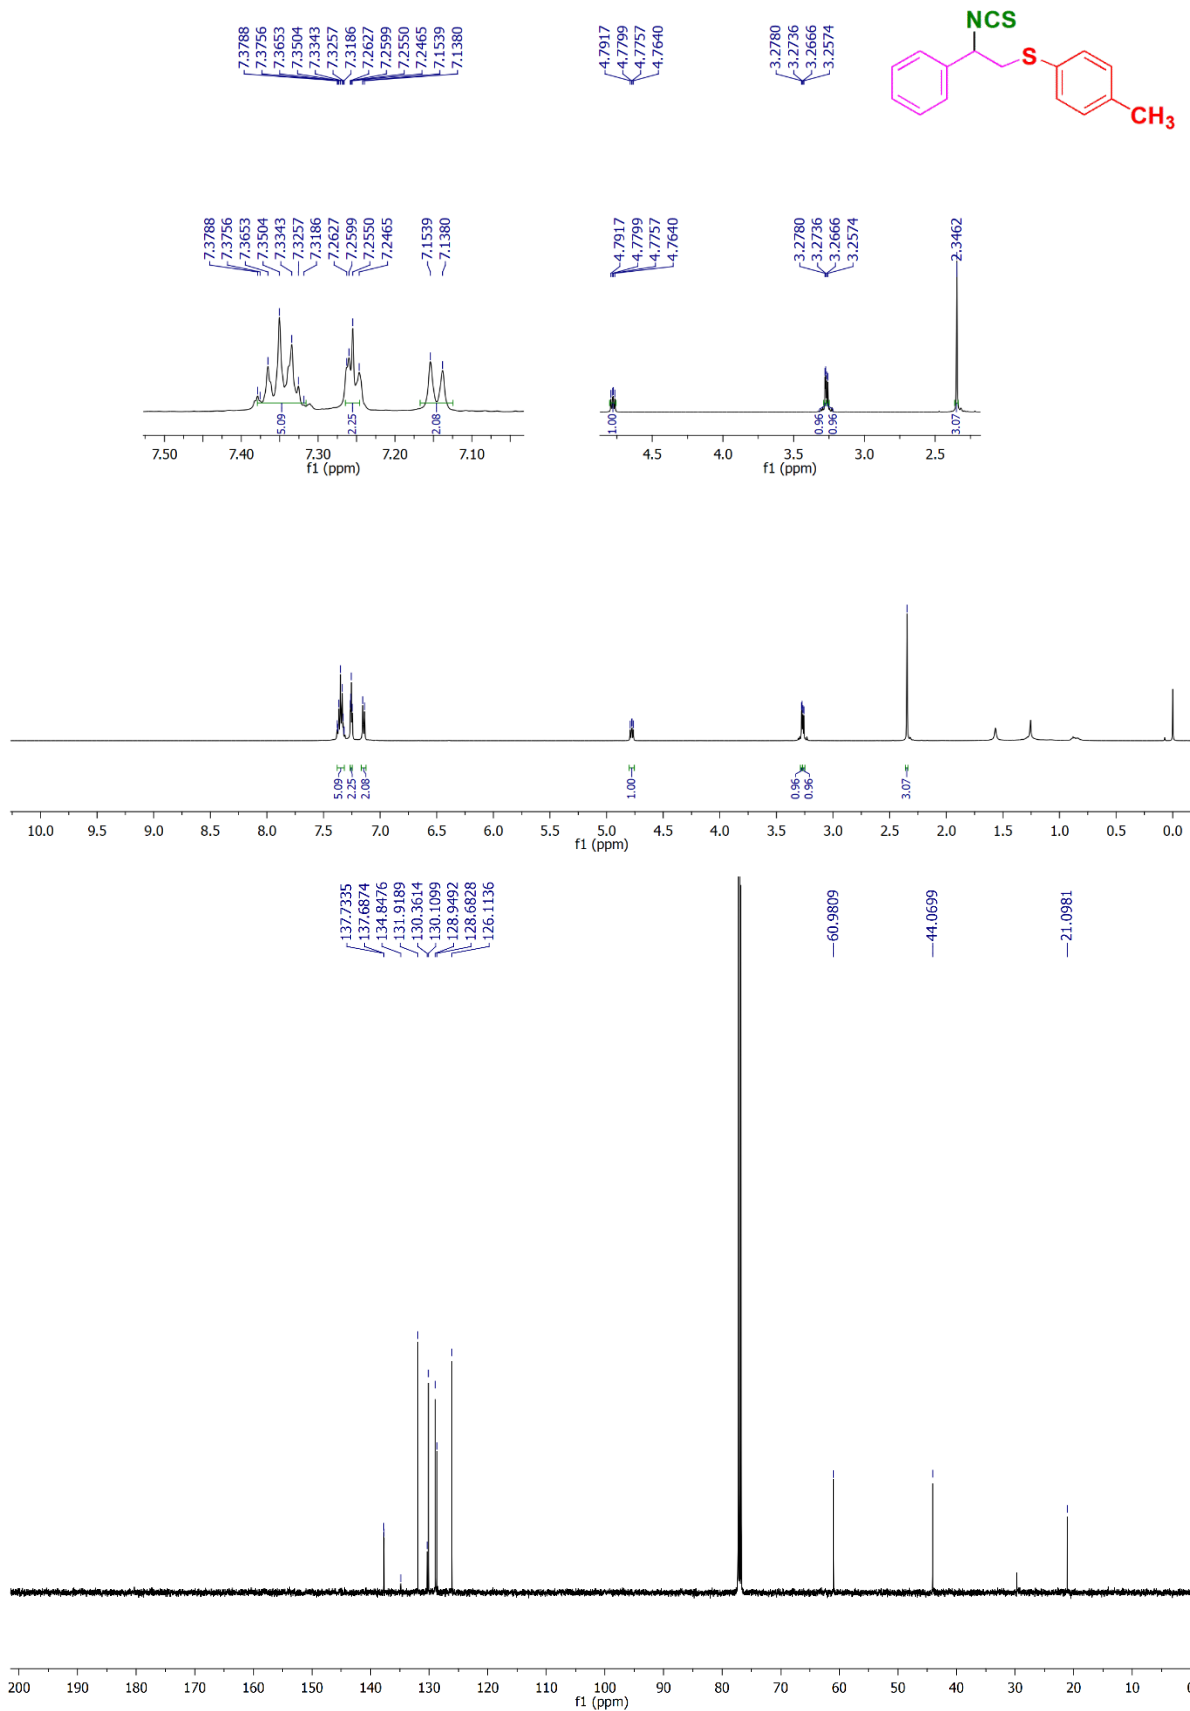

# $^1\text{H}$ and $^{13}\text{C}$ NMR for 4g

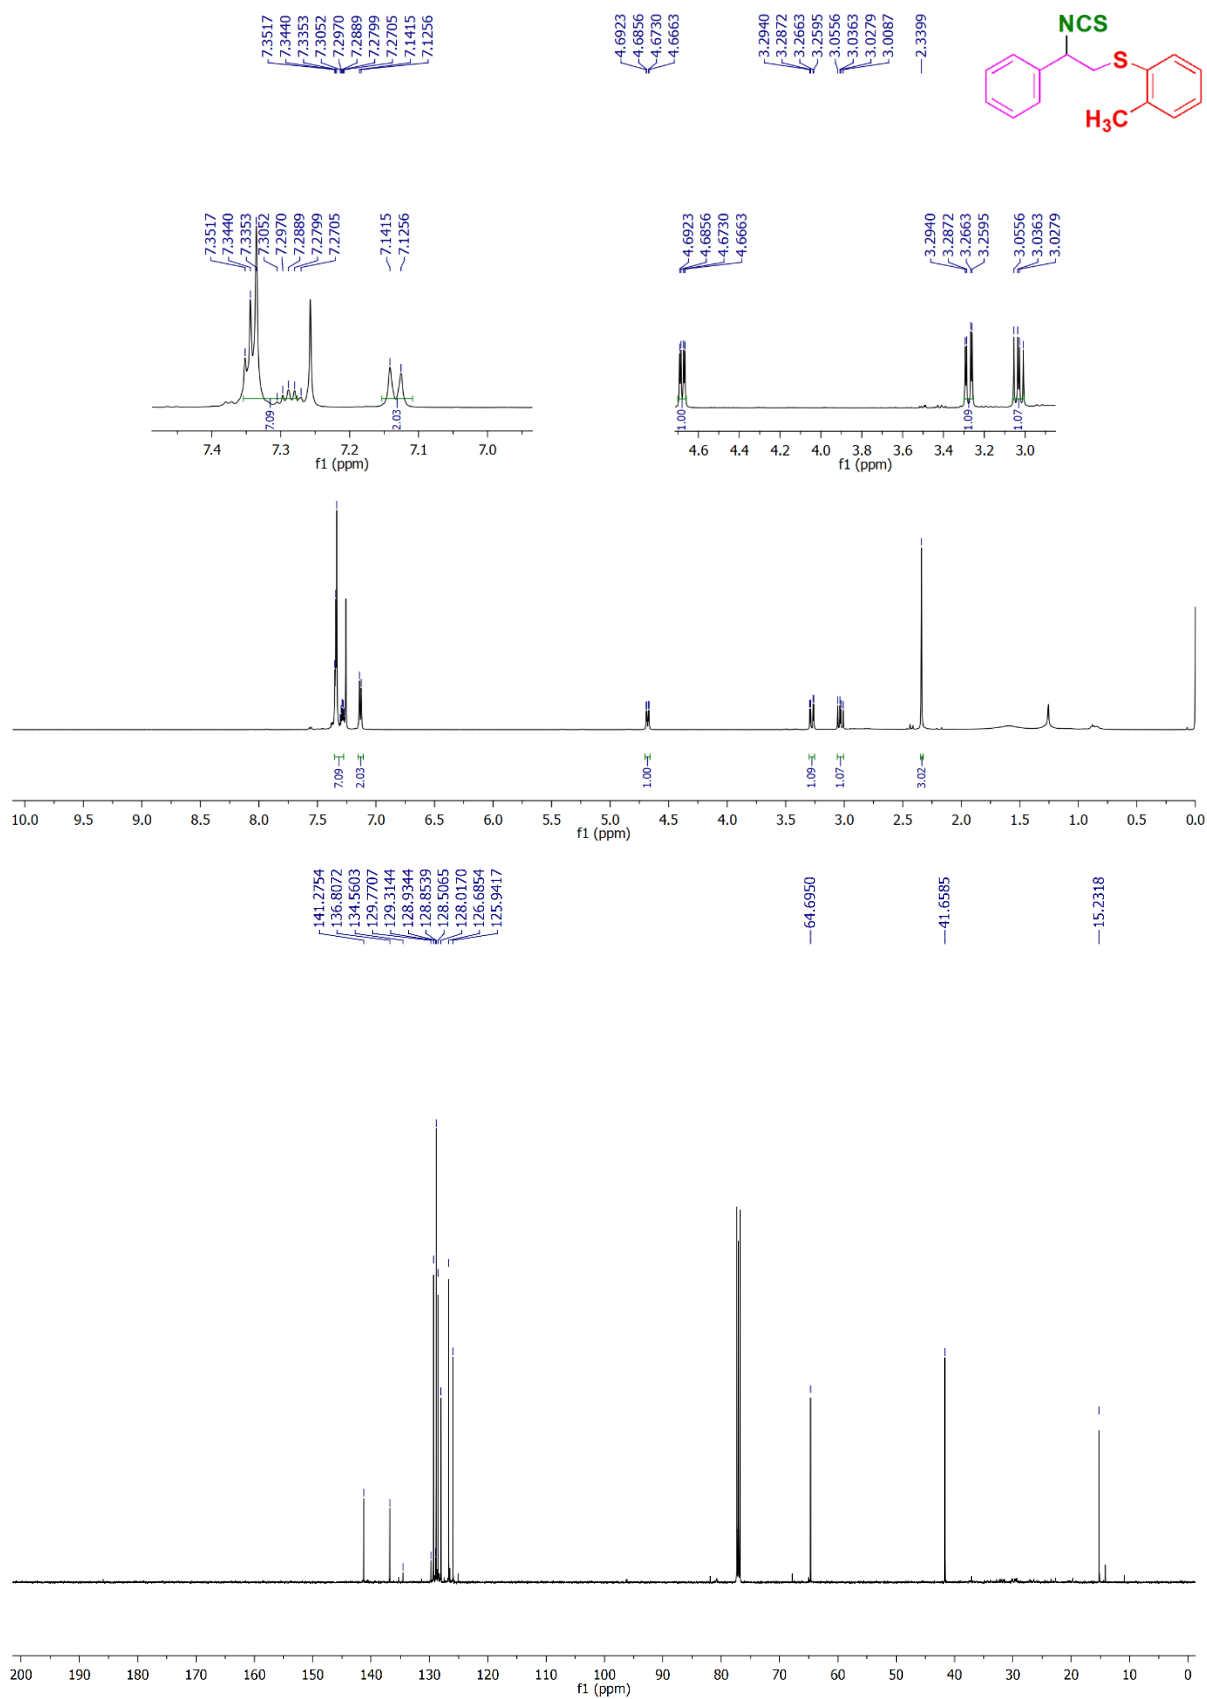

# $^1\text{H}$ and $^{13}\text{C}$ NMR for 4i

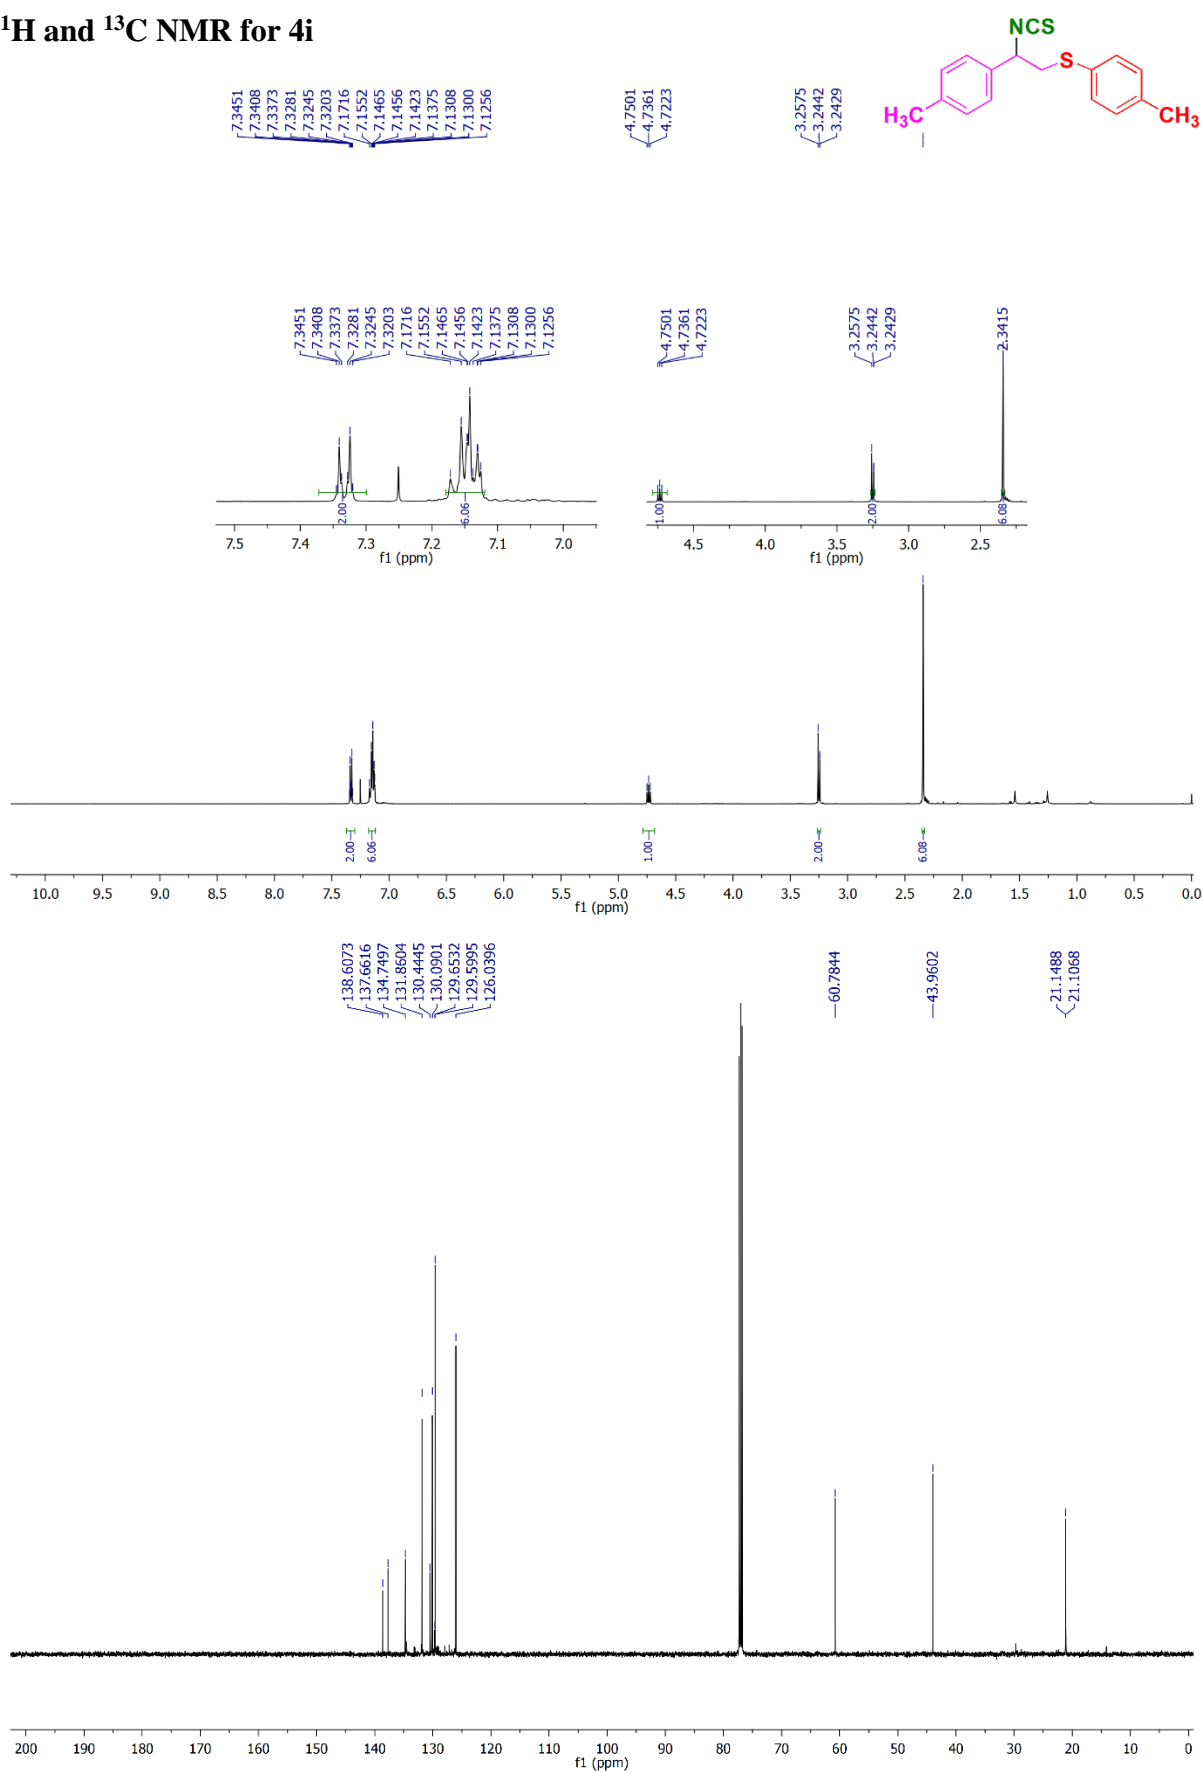



# <sup>1</sup>H and <sup>13</sup>C NMR for 7a

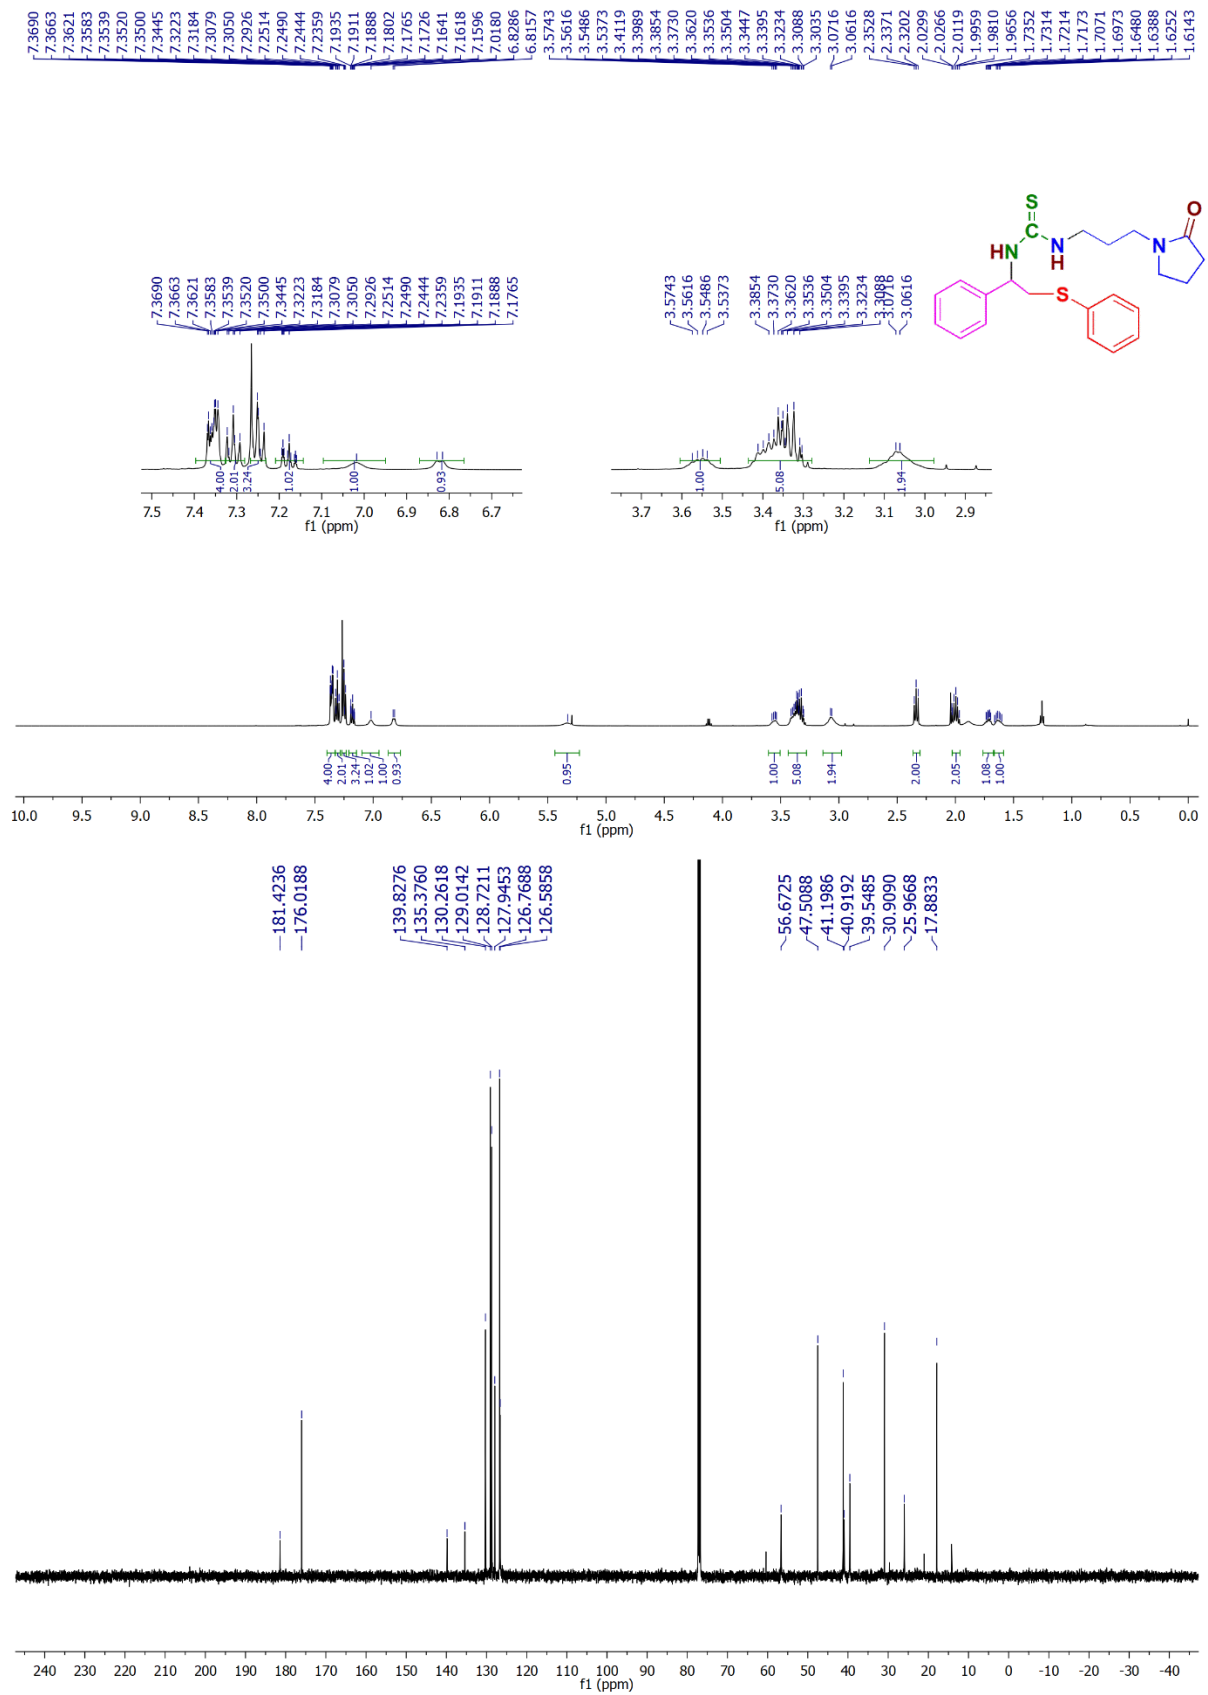

# <sup>1</sup>H and <sup>13</sup>C NMR for 7b

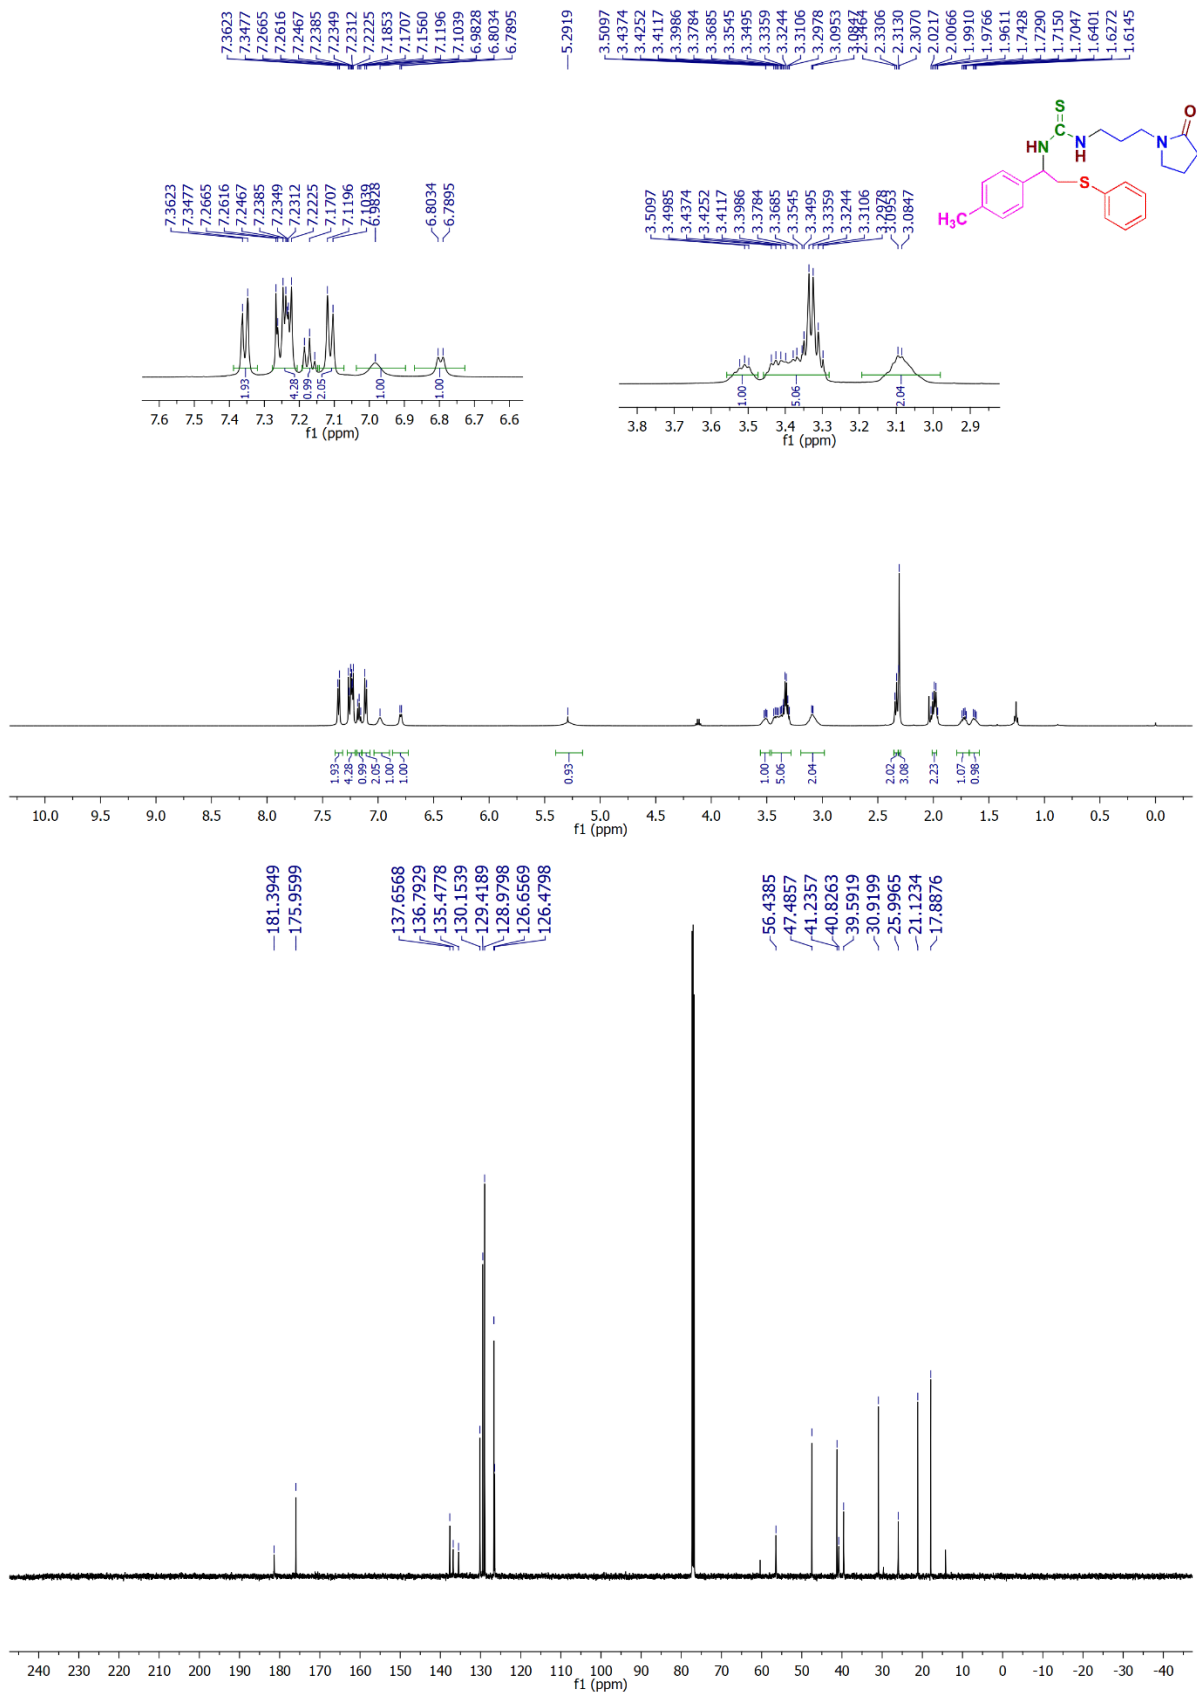

# <sup>1</sup>H and <sup>13</sup>C NMR for 7c

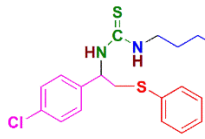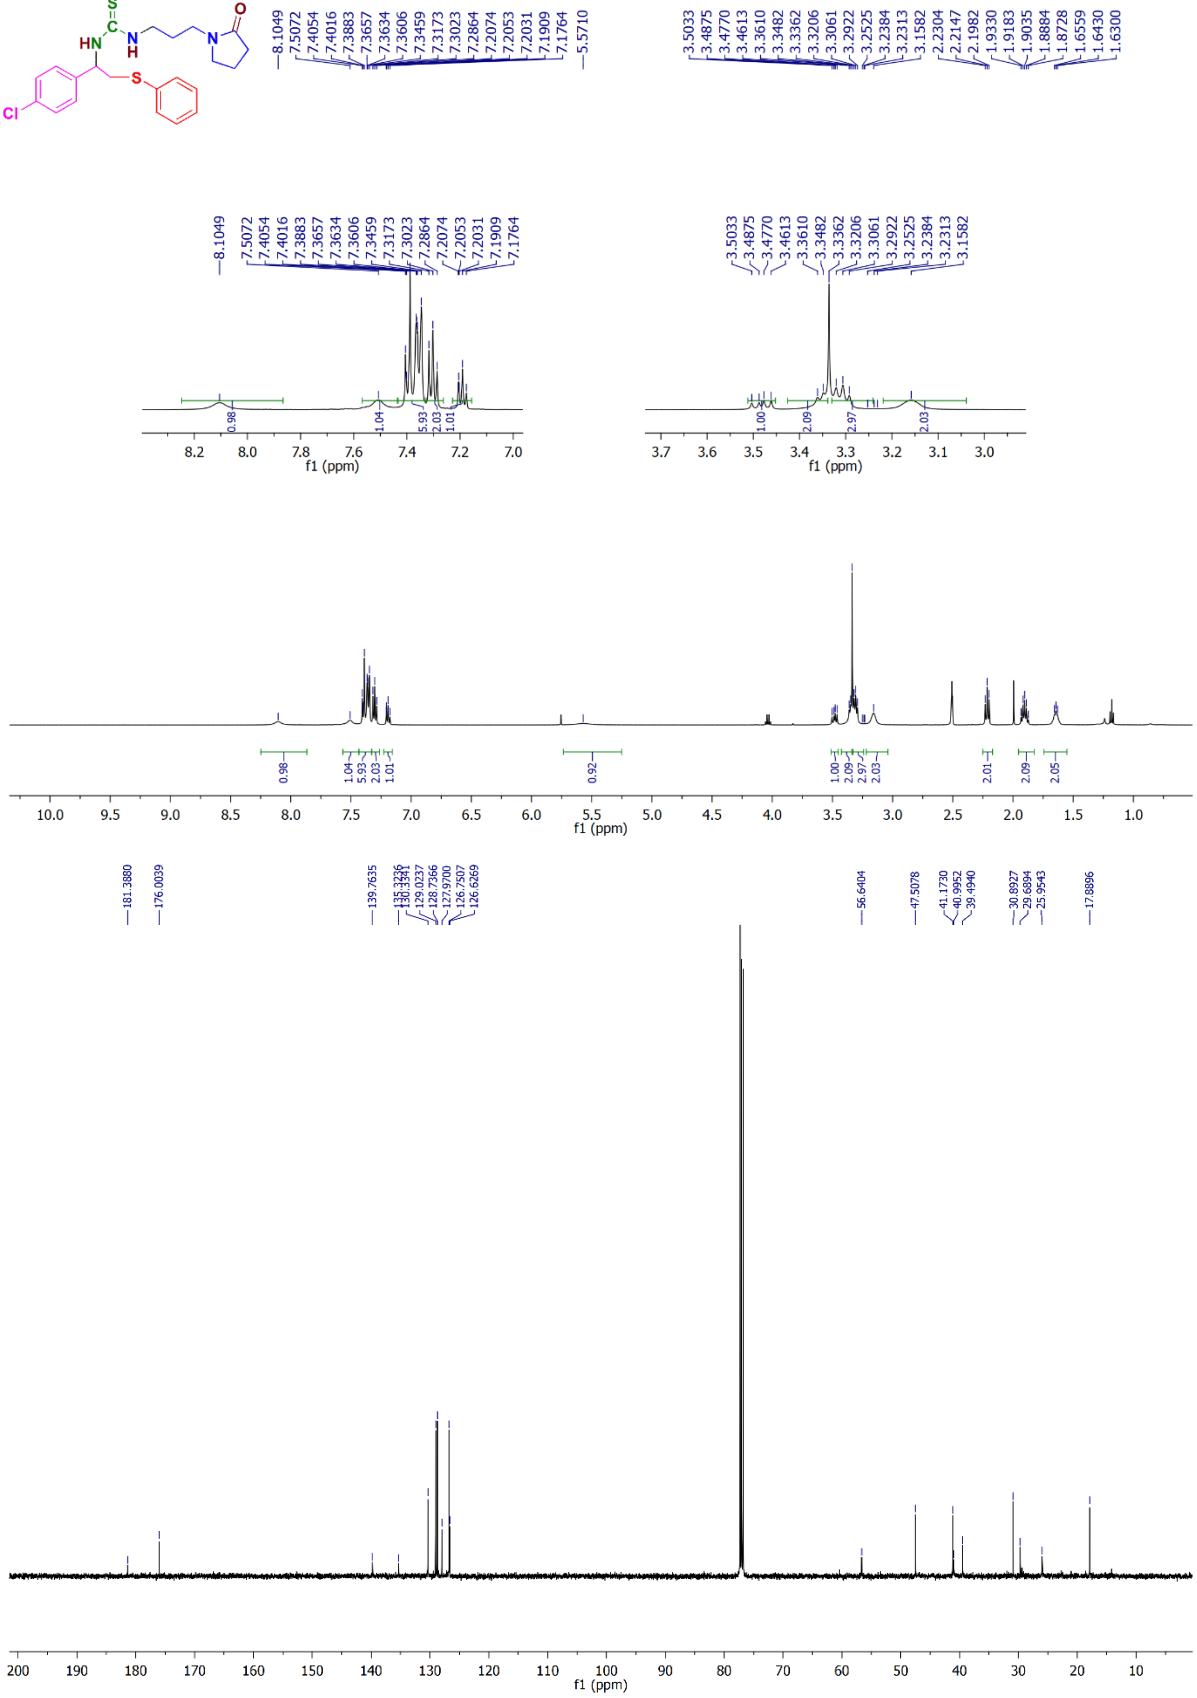

# <sup>1</sup>H and <sup>13</sup>C NMR for 7d

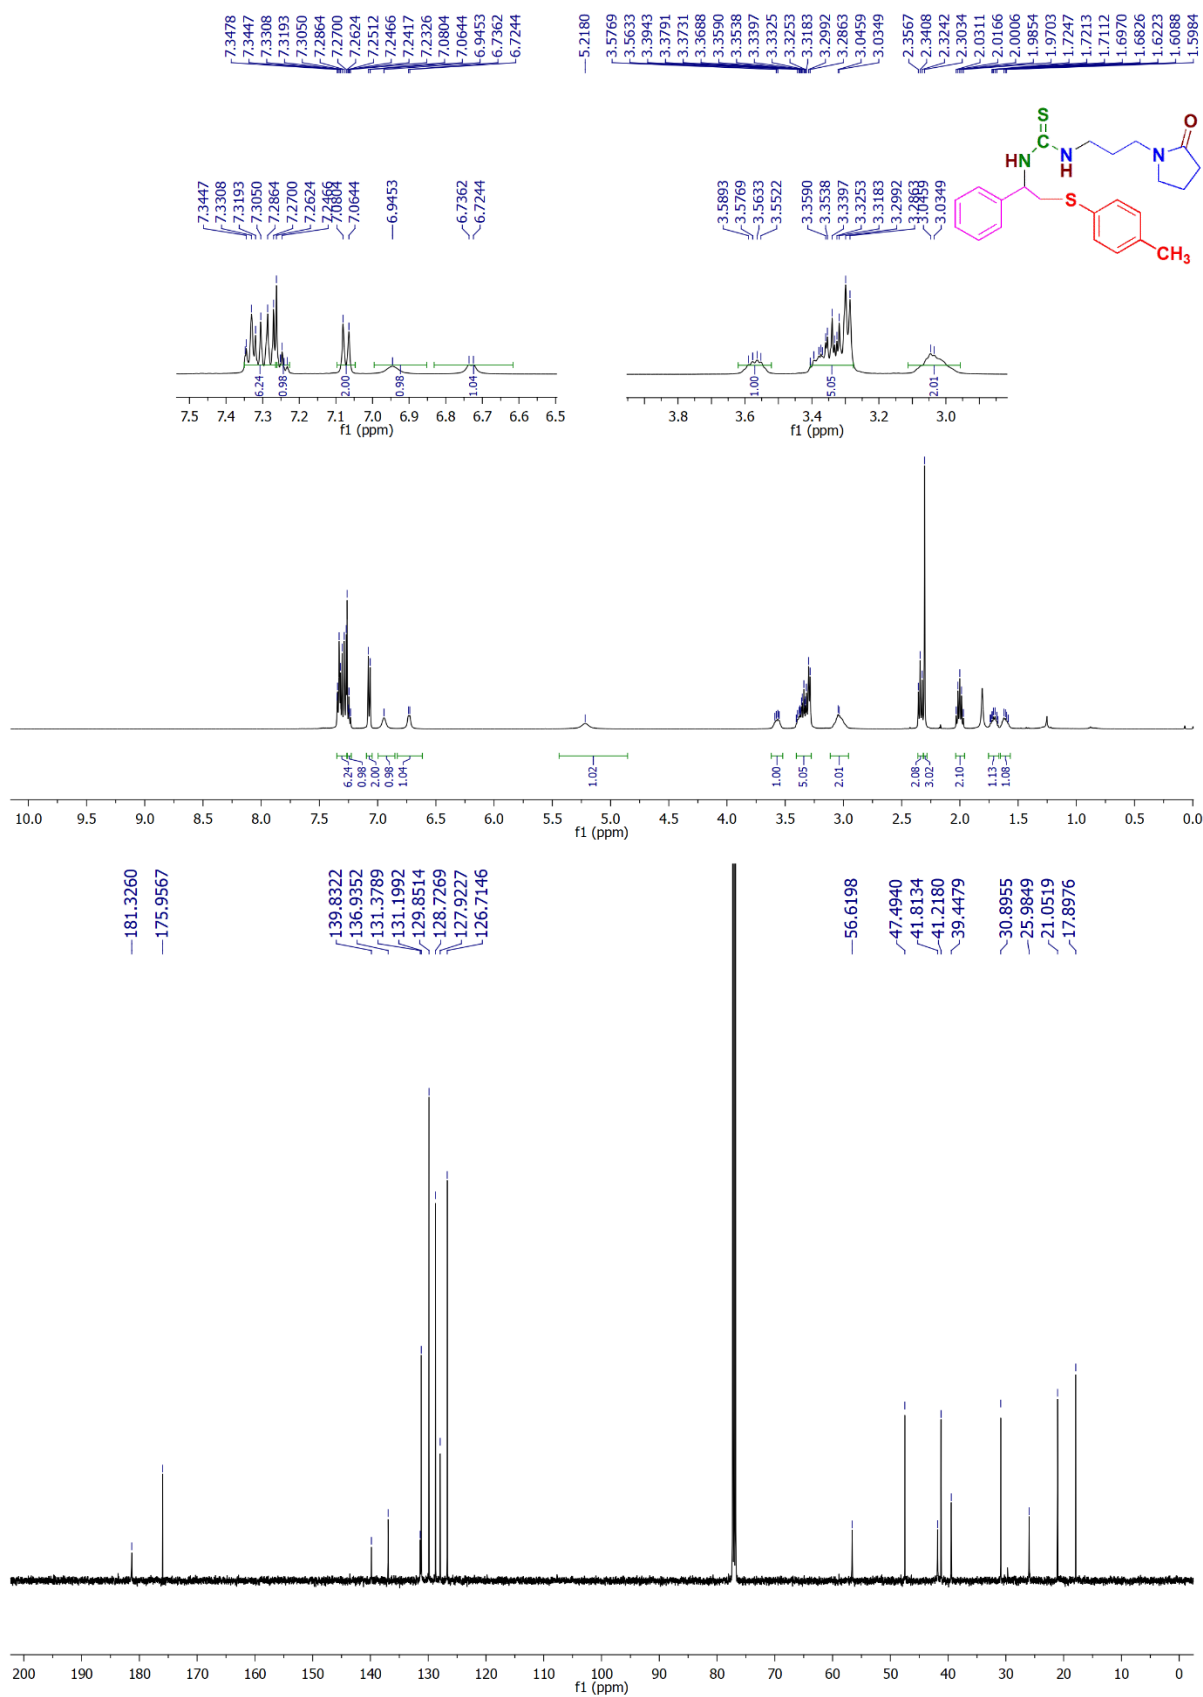

# <sup>1</sup>H and <sup>13</sup>C NMR for 7e

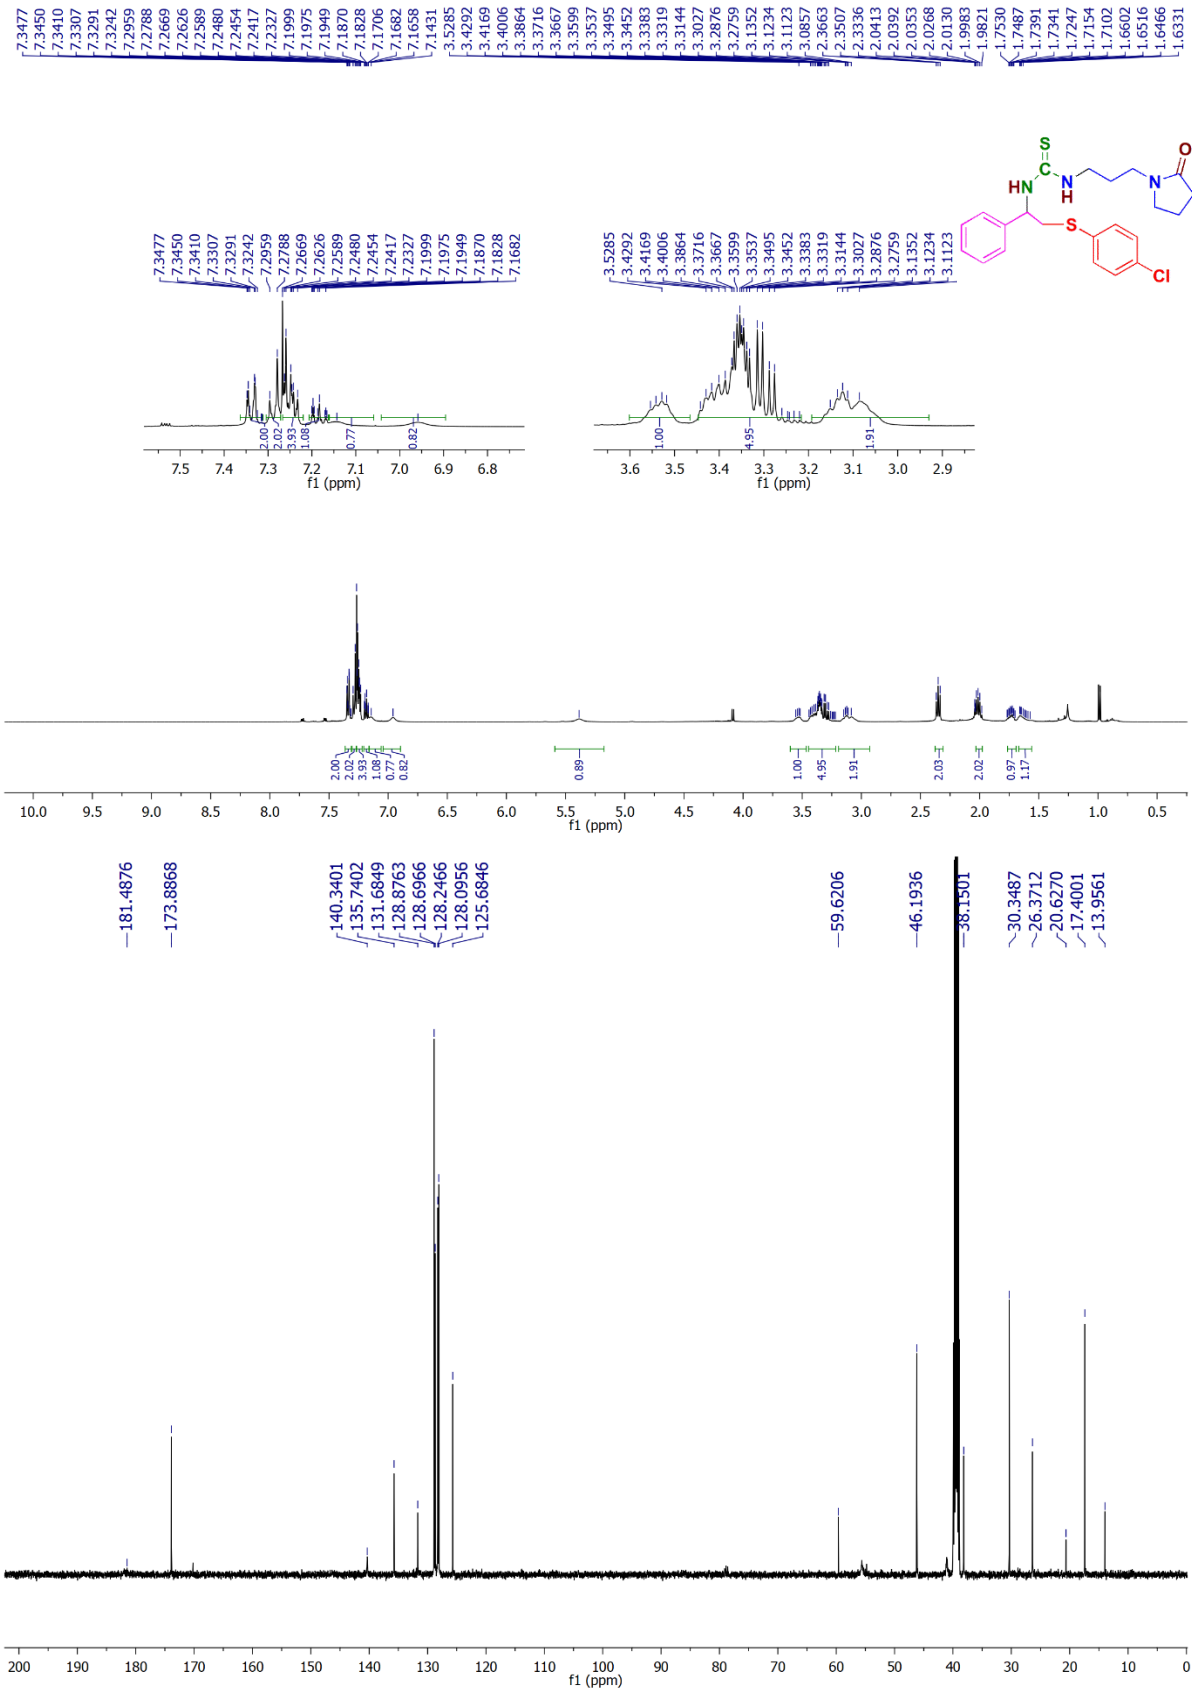

# <sup>1</sup>H and <sup>13</sup>C NMR for 7f

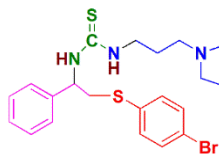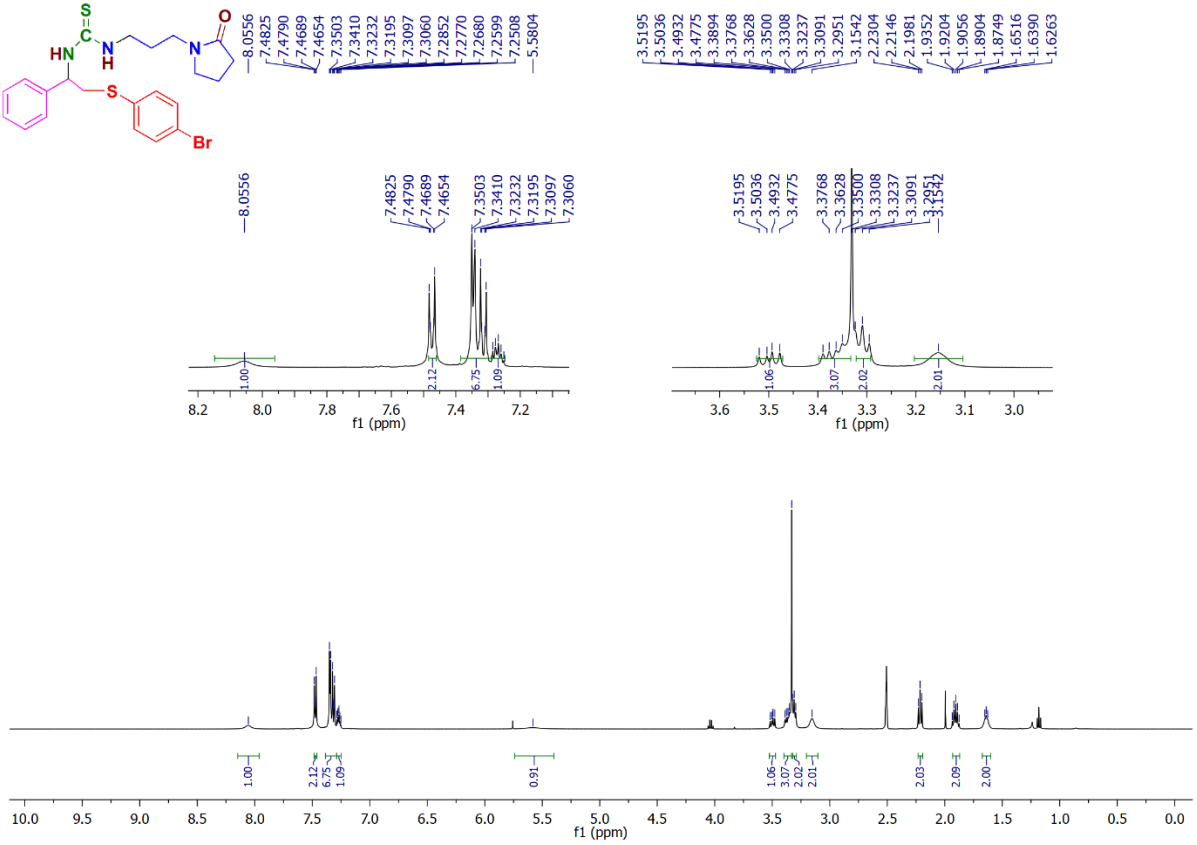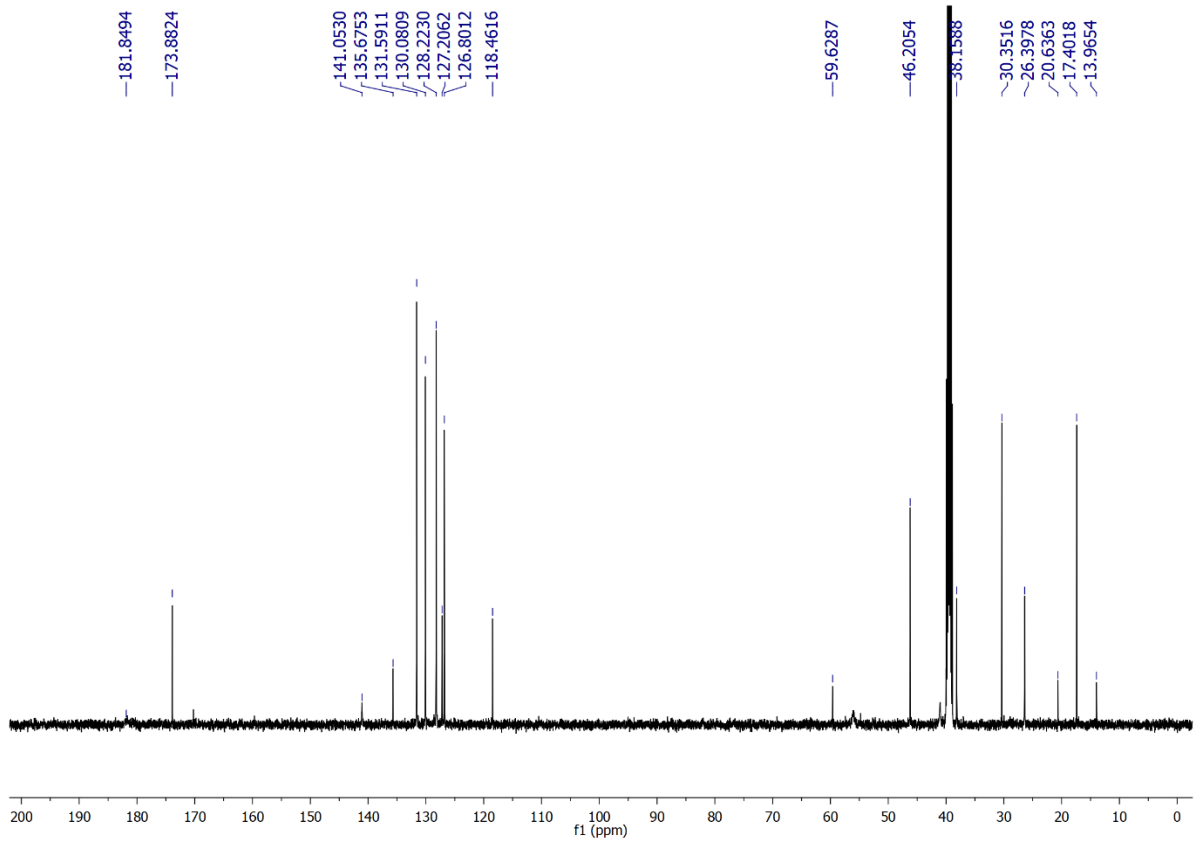

# $^1\text{H}$ and $^{13}\text{C}$ NMR for 7g

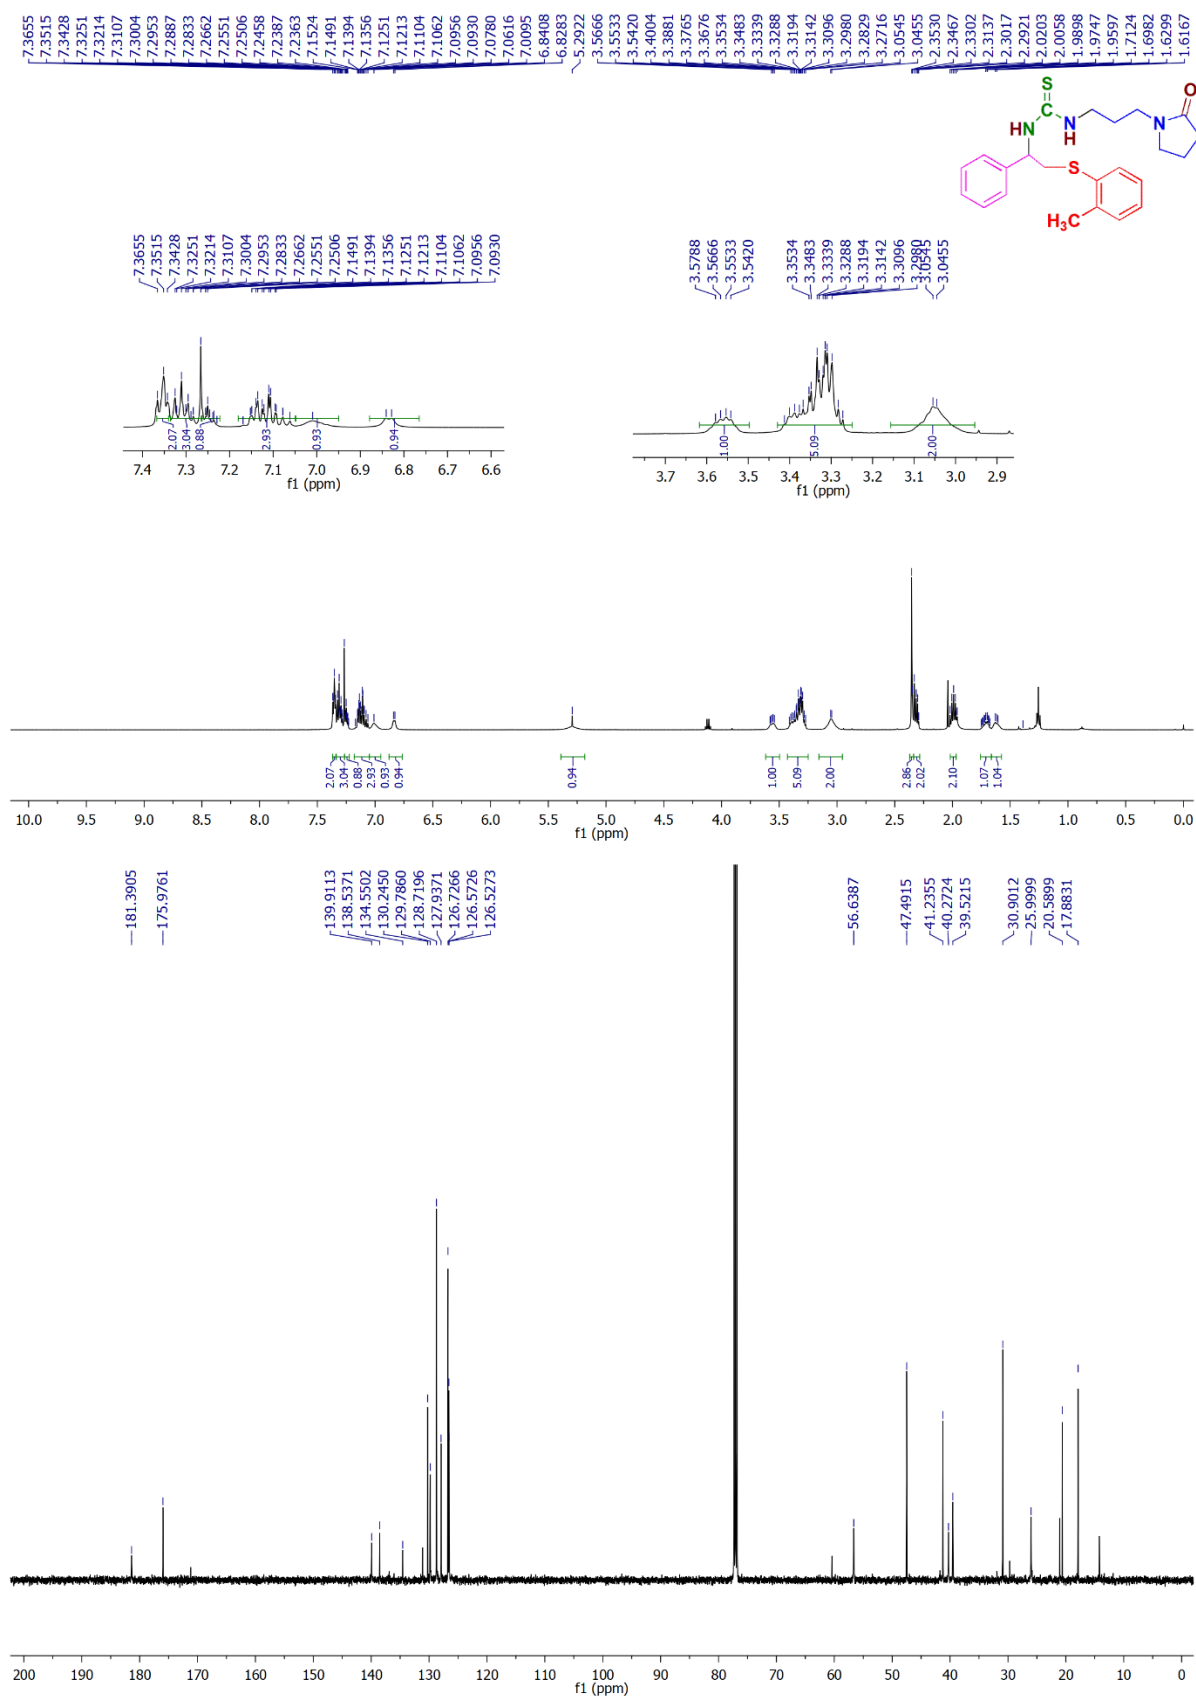

# <sup>1</sup>H and <sup>13</sup>C NMR for 7h

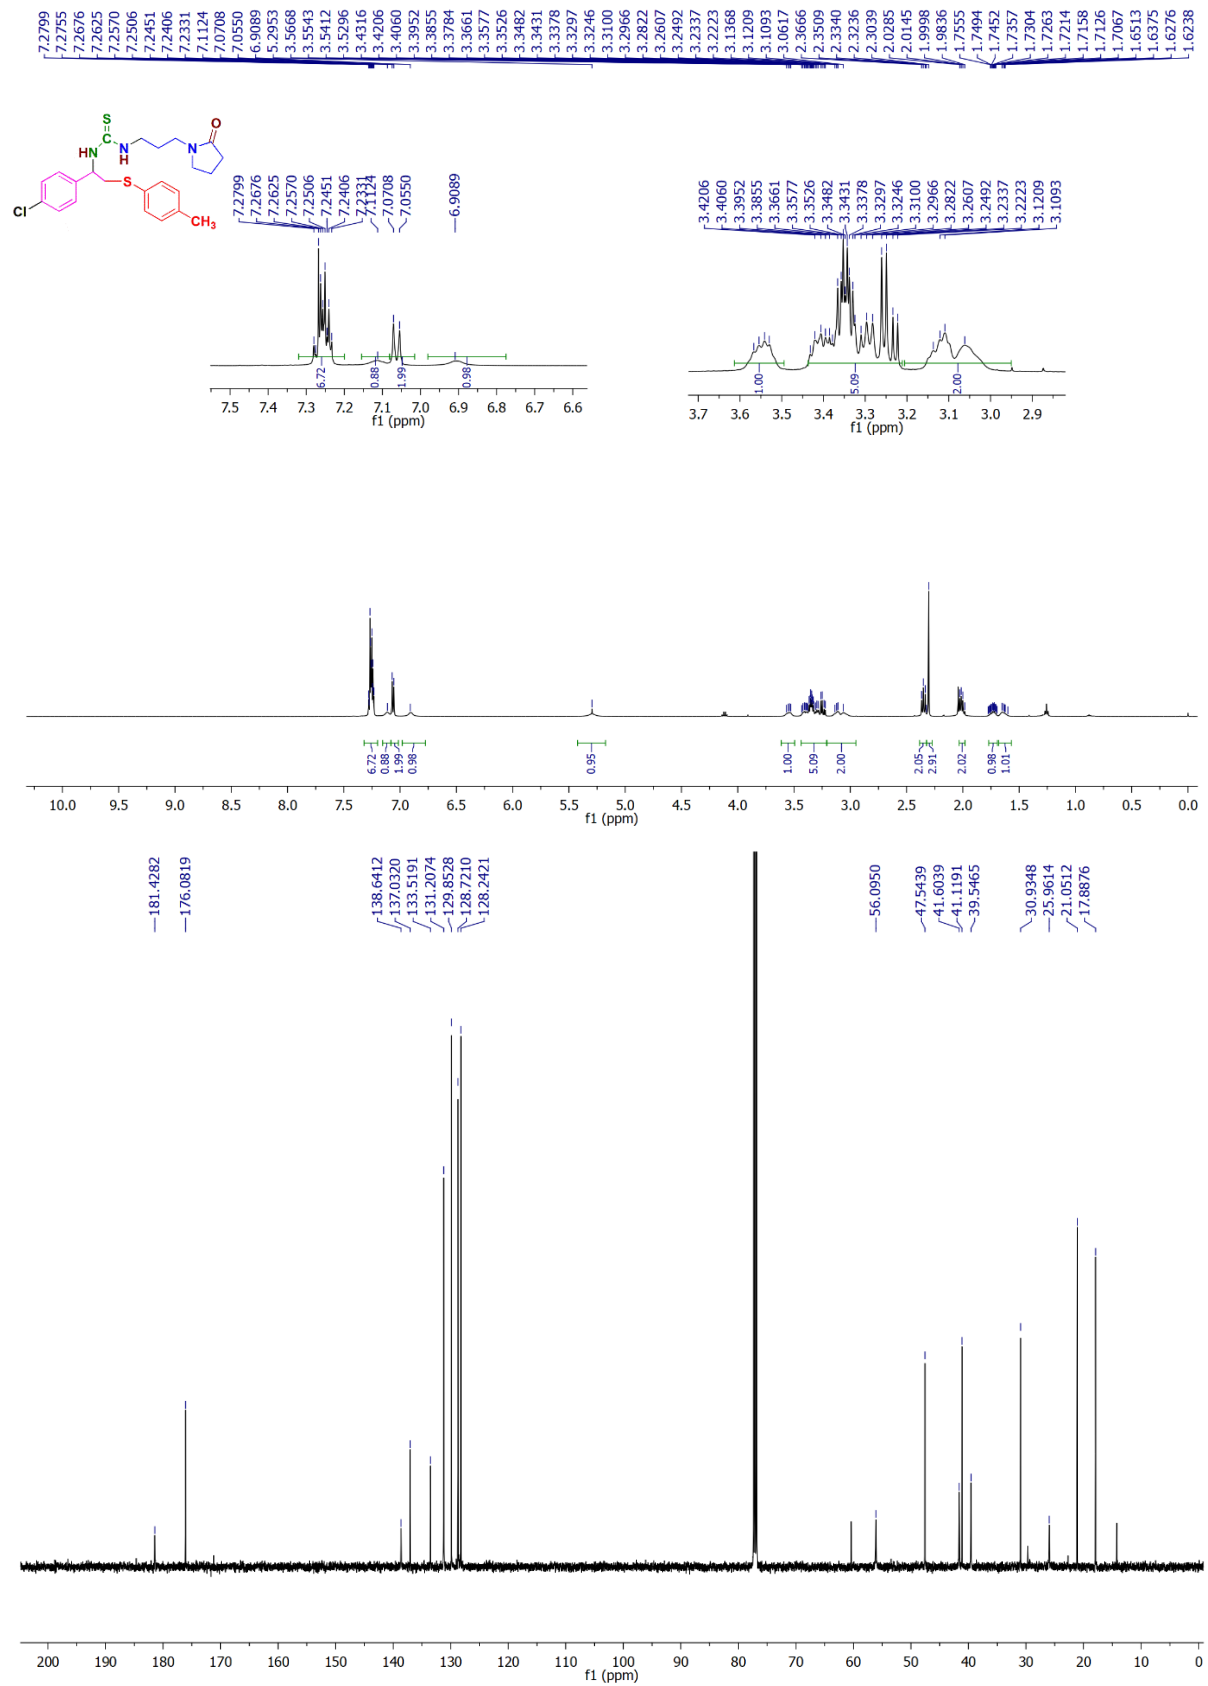



# <sup>1</sup>H and <sup>13</sup>C NMR for 7i

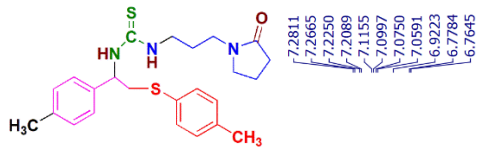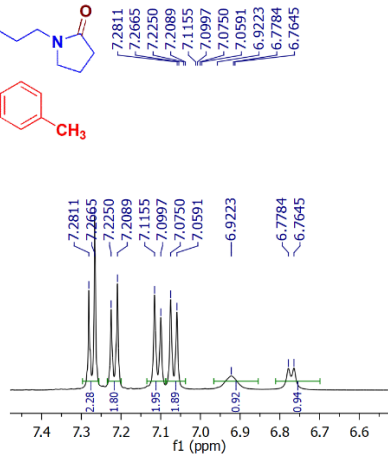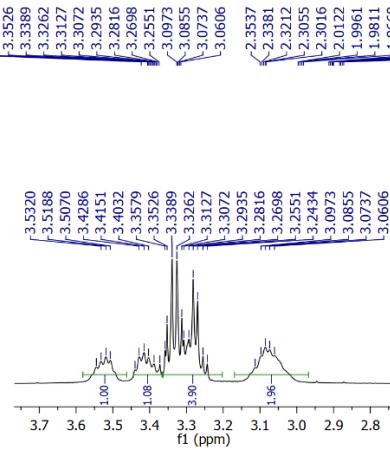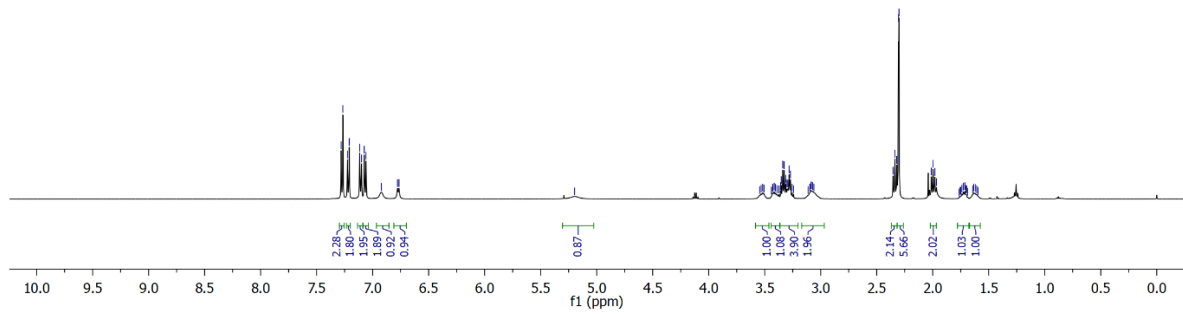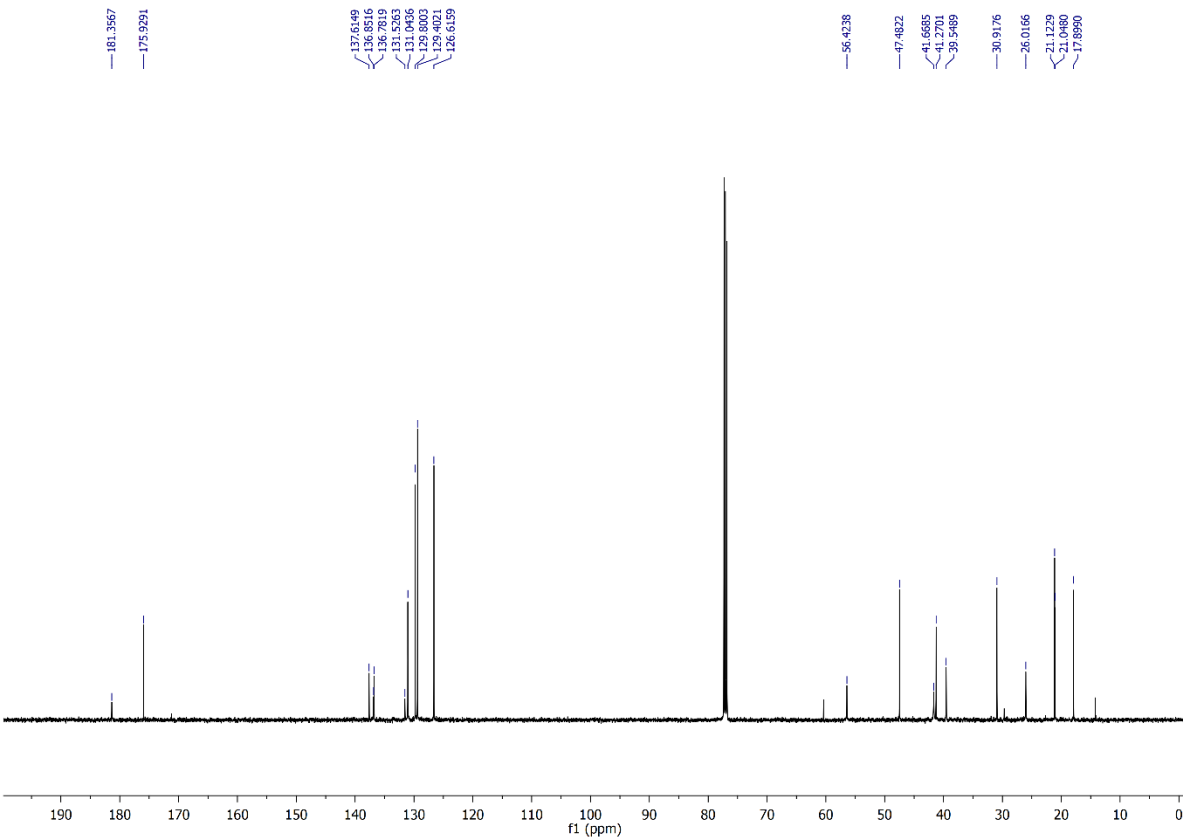

# <sup>1</sup>H and <sup>13</sup>C NMR for 7j

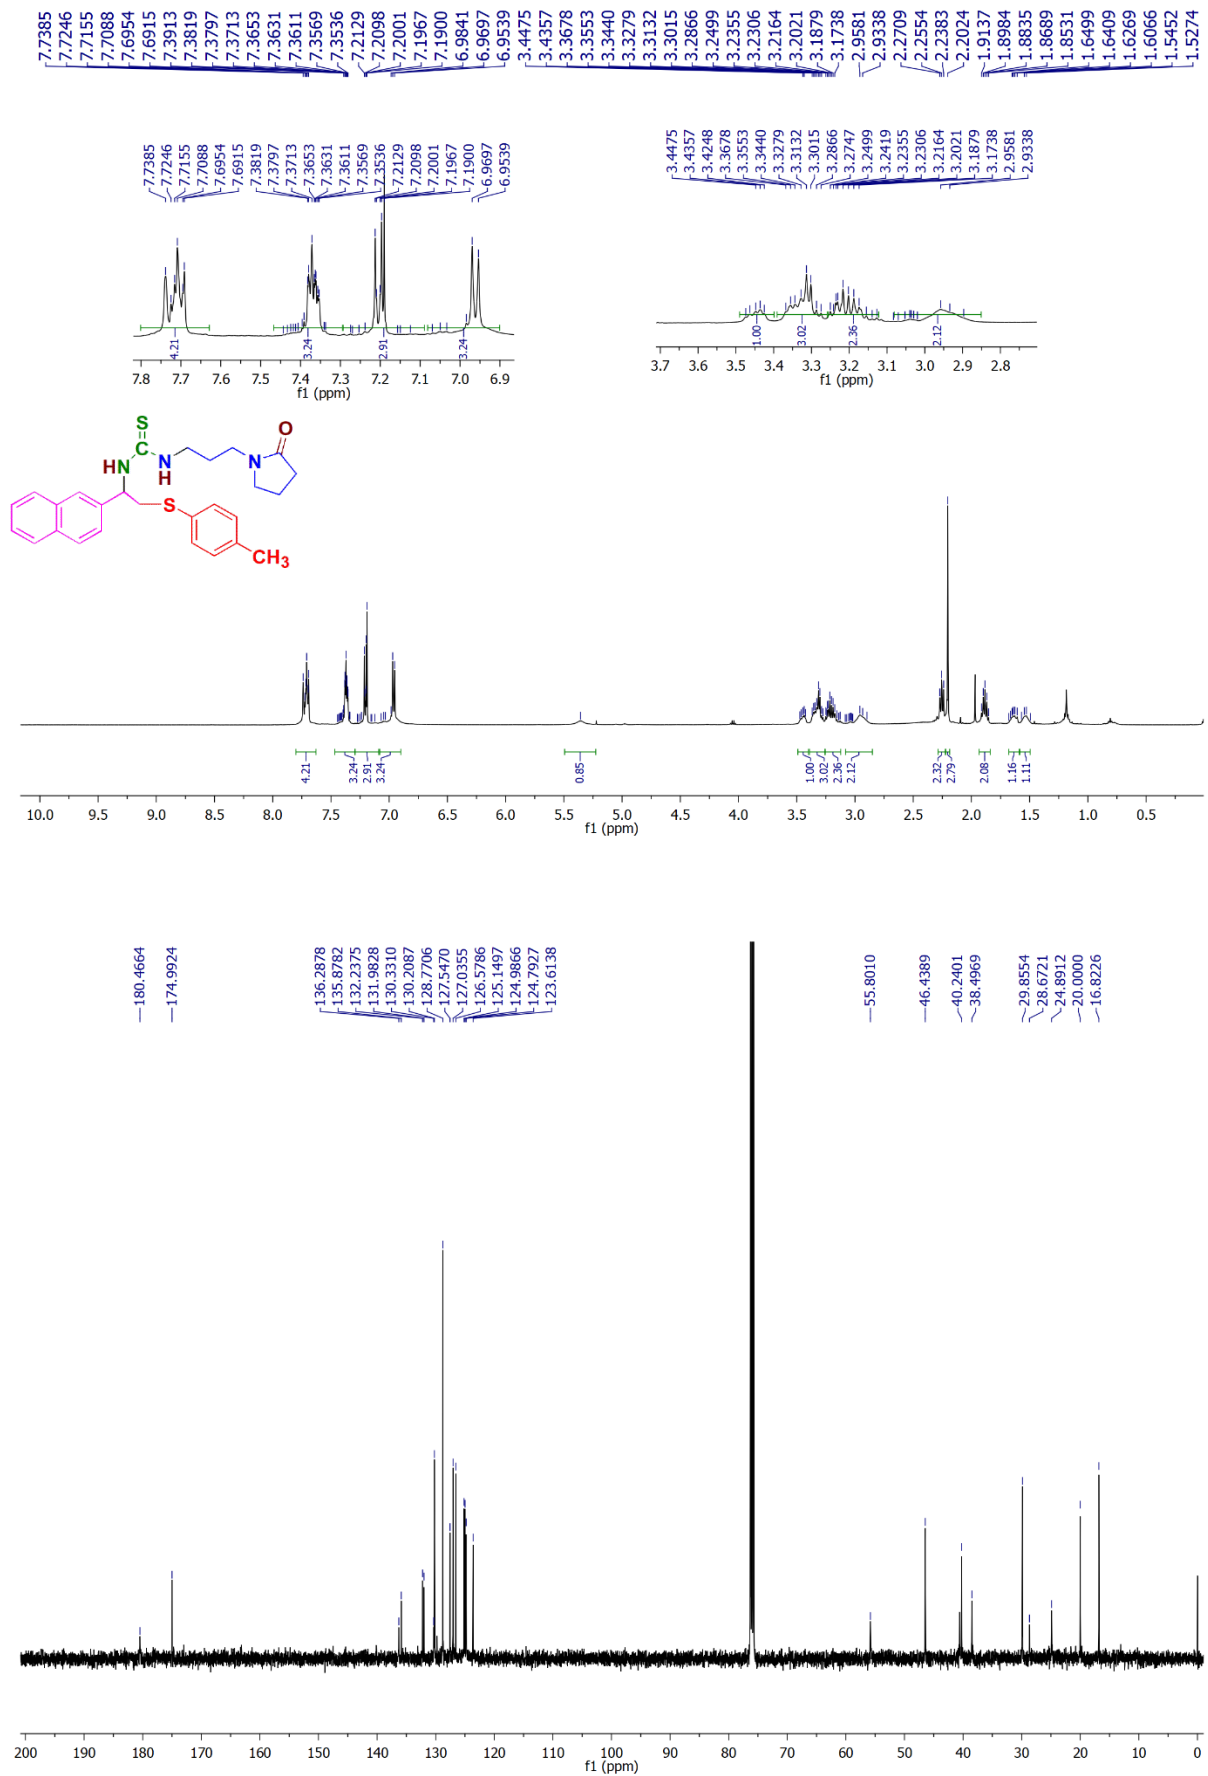

# $^1\text{H}$ and $^{13}\text{C}$ NMR for 8a

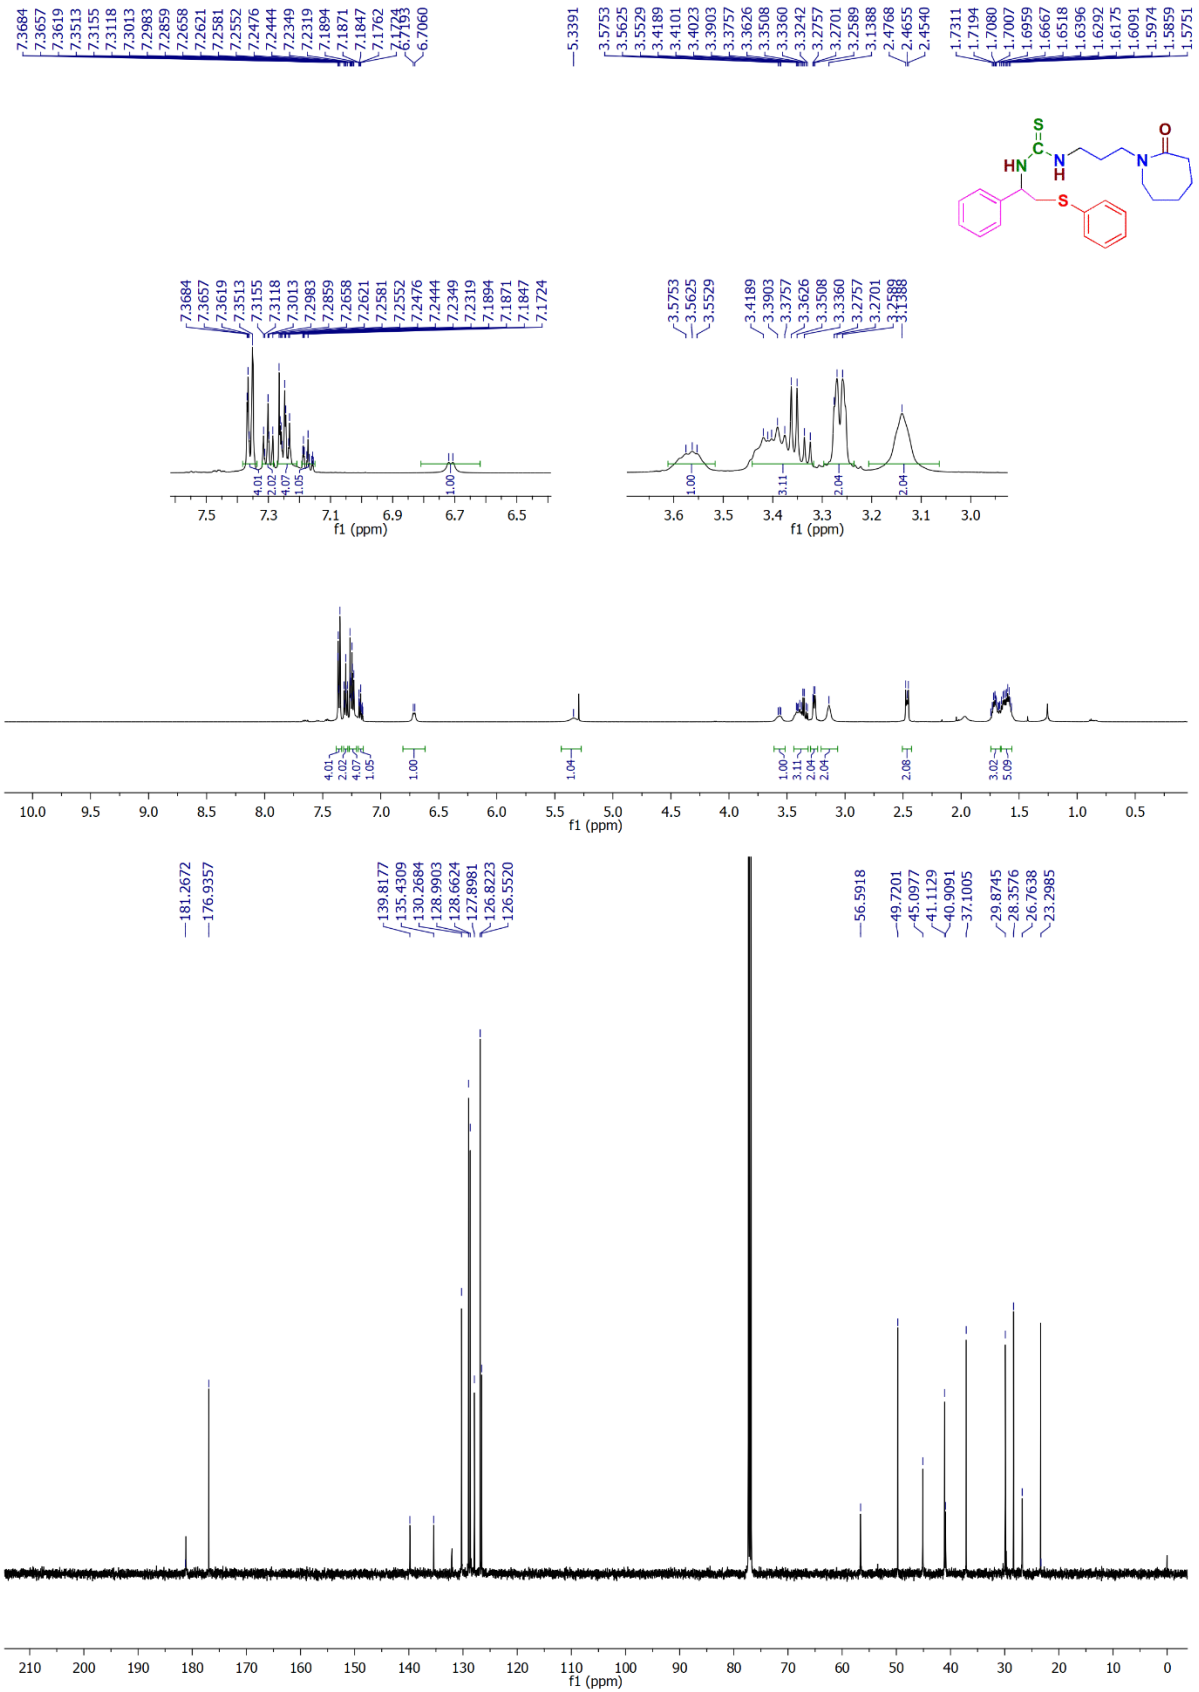

# <sup>1</sup>H and <sup>13</sup>C NMR for 8b

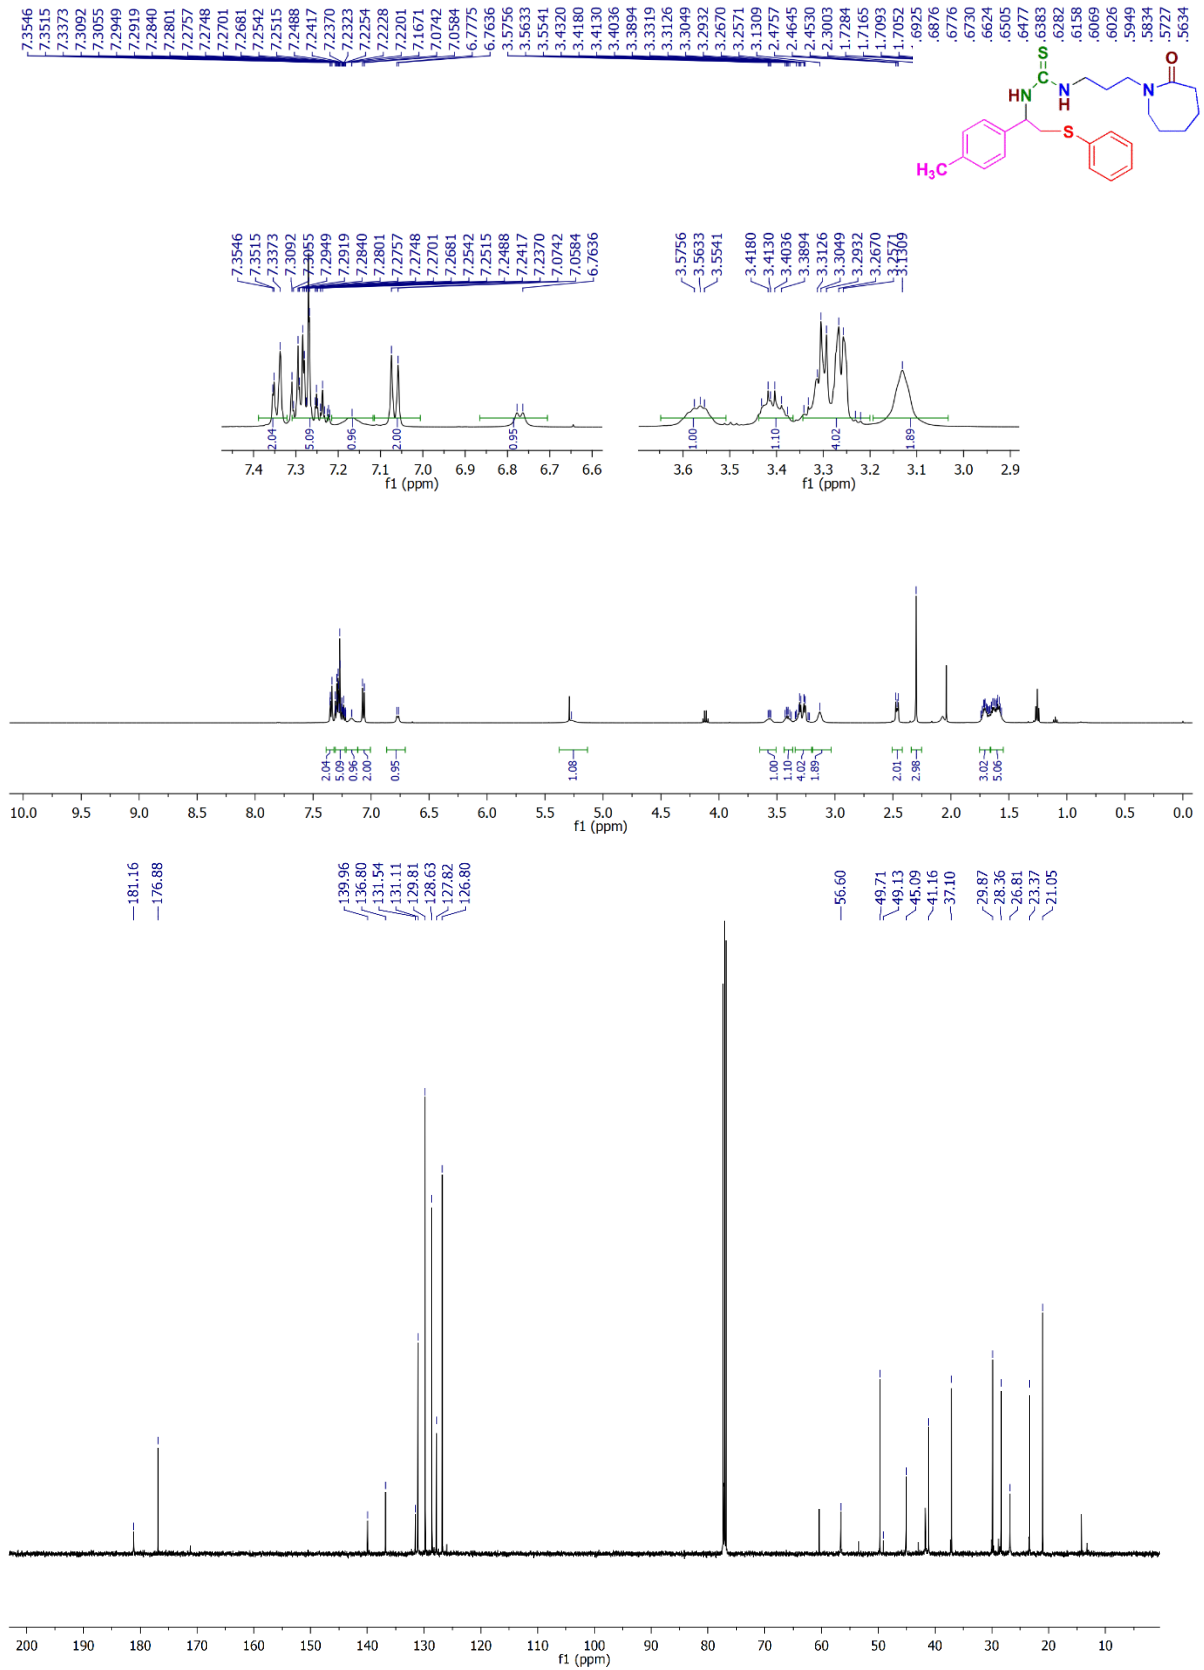

# <sup>1</sup>H and <sup>13</sup>C NMR for 8c

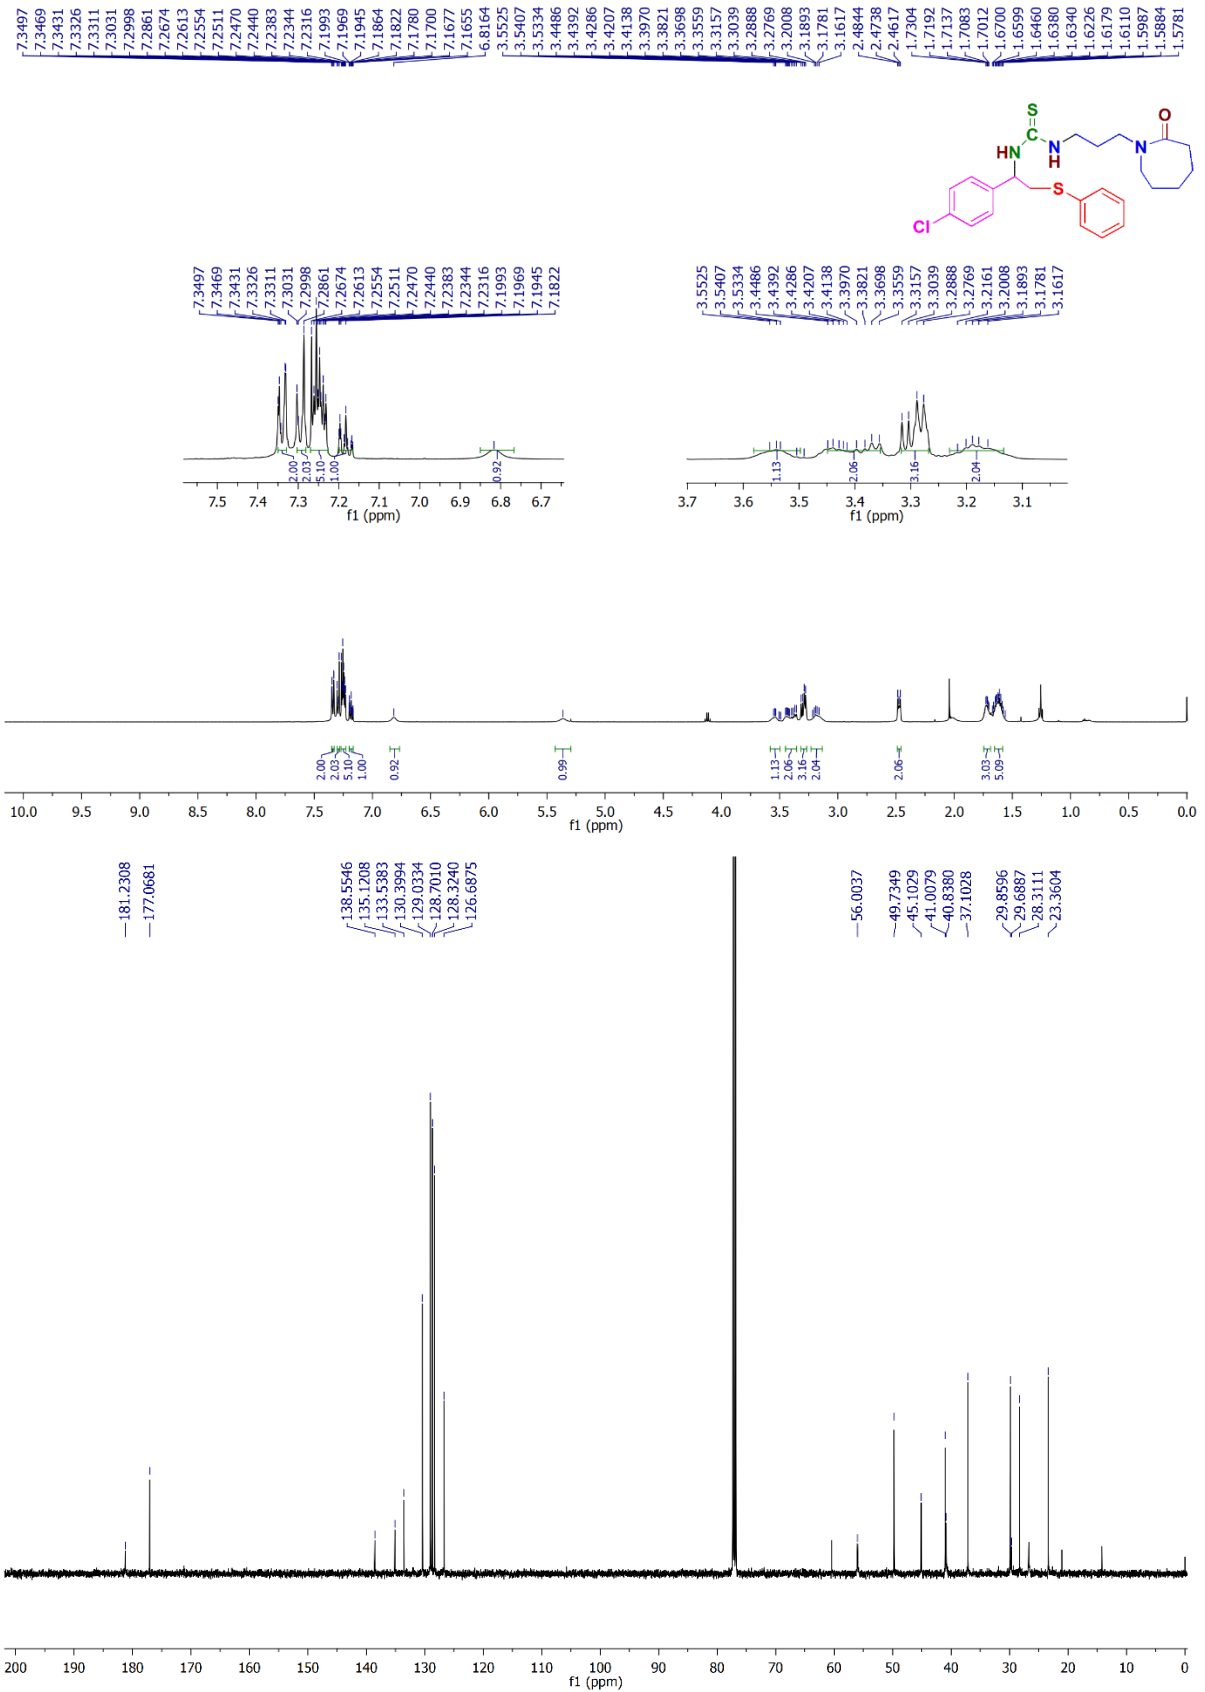

# <sup>1</sup>H and <sup>13</sup>C NMR for 8d

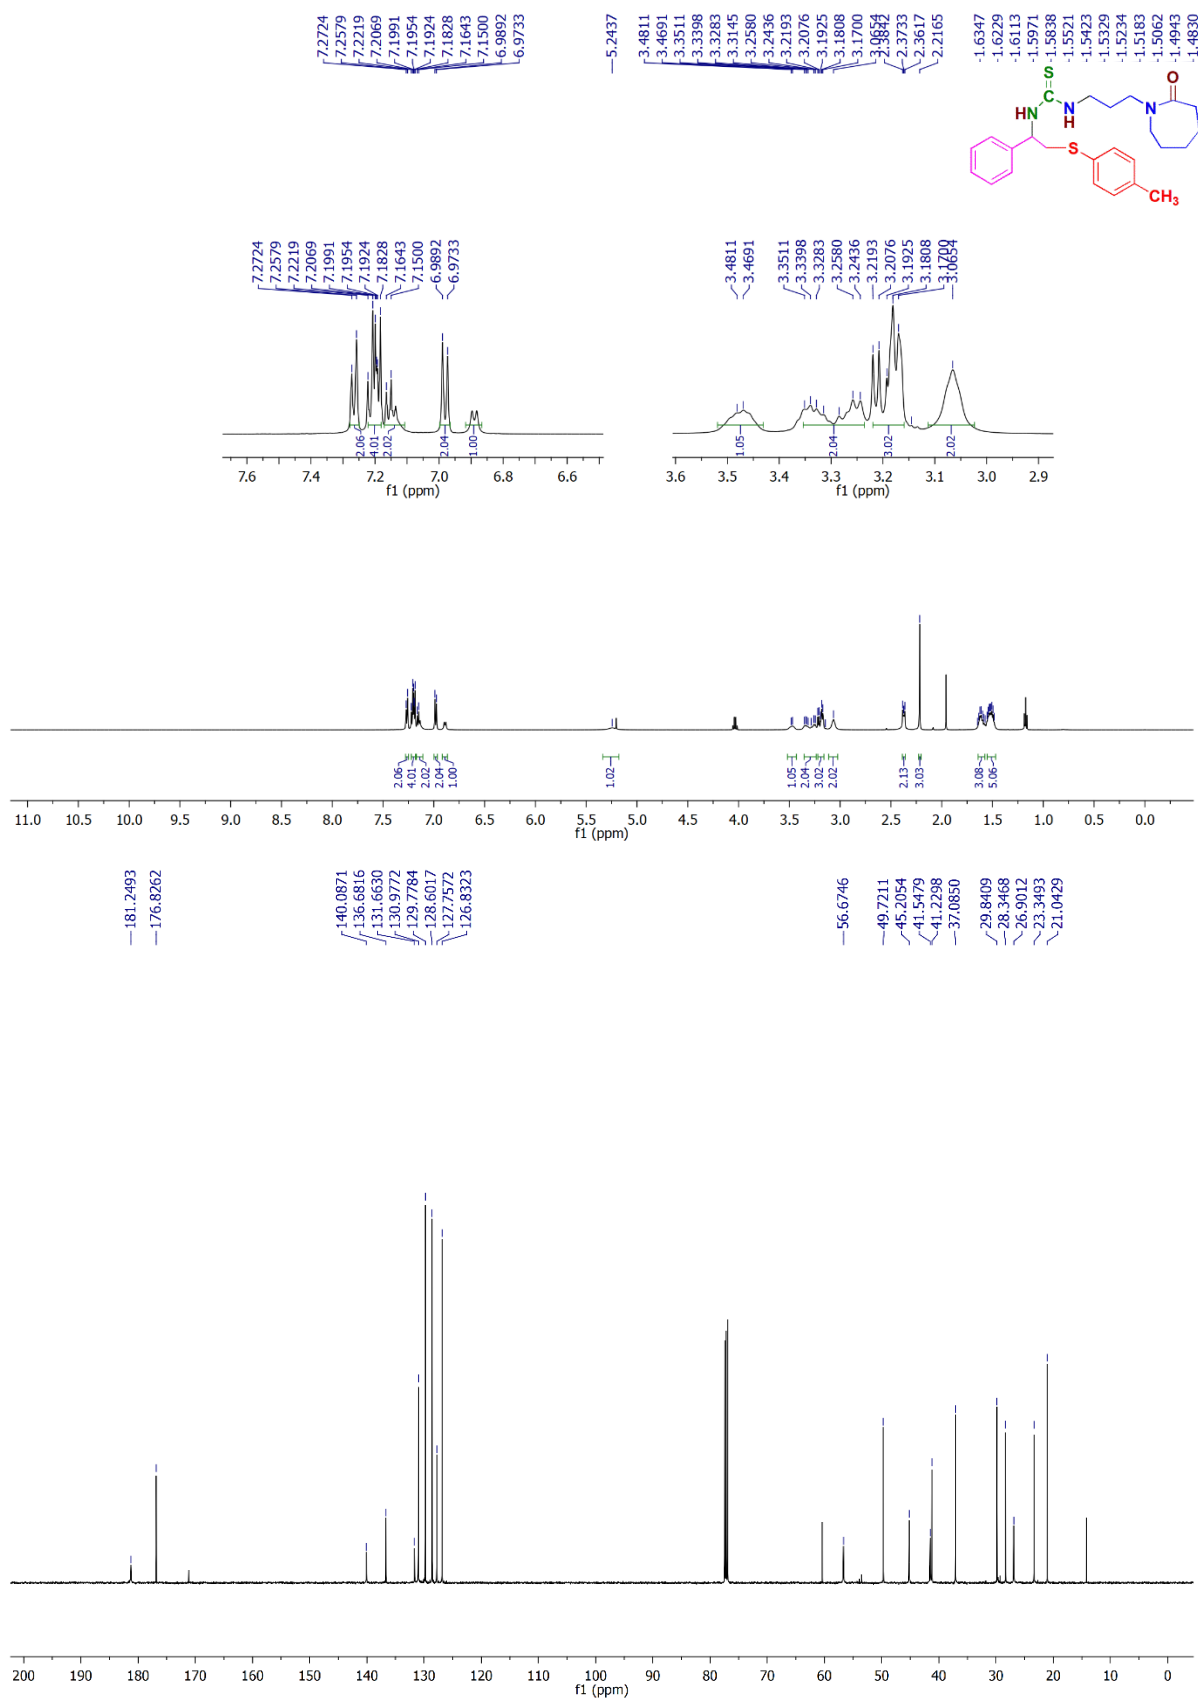

# <sup>1</sup>H and <sup>13</sup>C NMR for 8e

7.3525  
7.3497  
7.3457  
7.3378  
7.3356  
7.3336  
7.3289  
7.3031  
7.2995  
7.2900  
7.2860  
7.2648  
7.2587  
7.2541  
7.2490  
7.2460  
7.2415  
7.2366  
7.2337  
7.2297  
7.2017  
7.1993  
7.1967  
7.1888  
7.1845  
7.1802  
7.1724  
7.1700  
3.5429  
3.4388  
3.4283  
3.3662  
3.3523  
3.3187  
3.3069  
3.2917  
3.2799  
3.2728  
3.2728  
3.2023  
3.1906  
3.1794  
3.1624  
2.4883  
2.4778  
2.4655  
1.7458  
1.7340  
1.7280  
1.7226  
1.7161  
1.7098  
1.7054  
1.7005  
1.6944  
1.6858  
1.6770  
1.6710  
1.6611  
1.6505  
1.6427  
1.6388  
1.6331  
1.6245  
1.6132  
1.6013  
1.5908

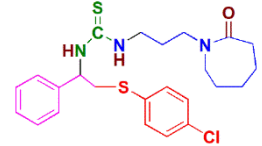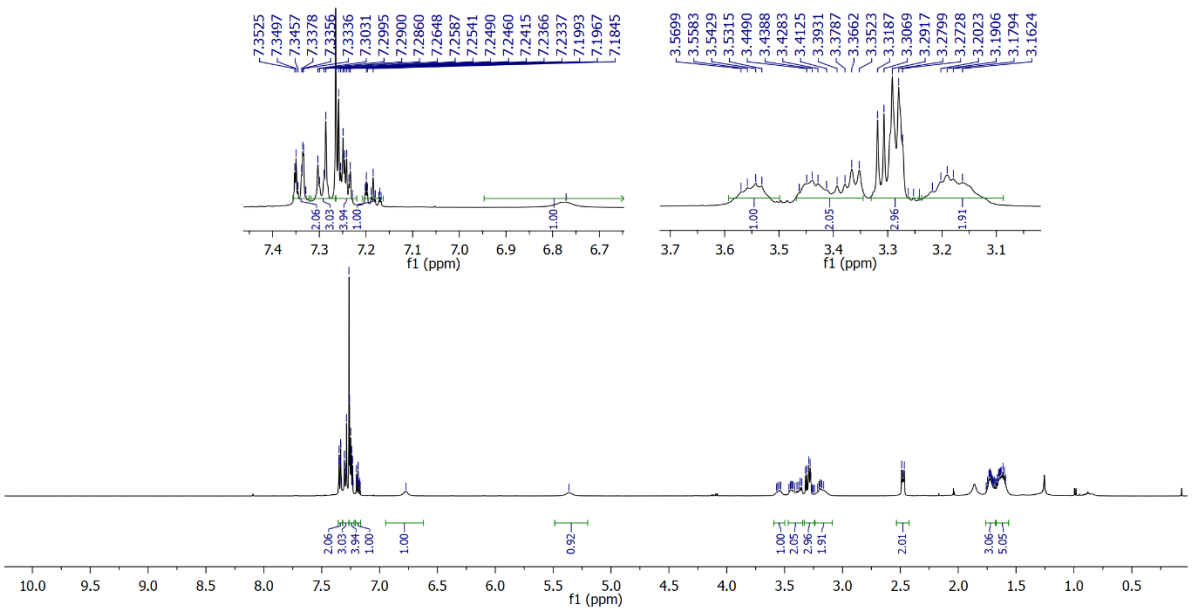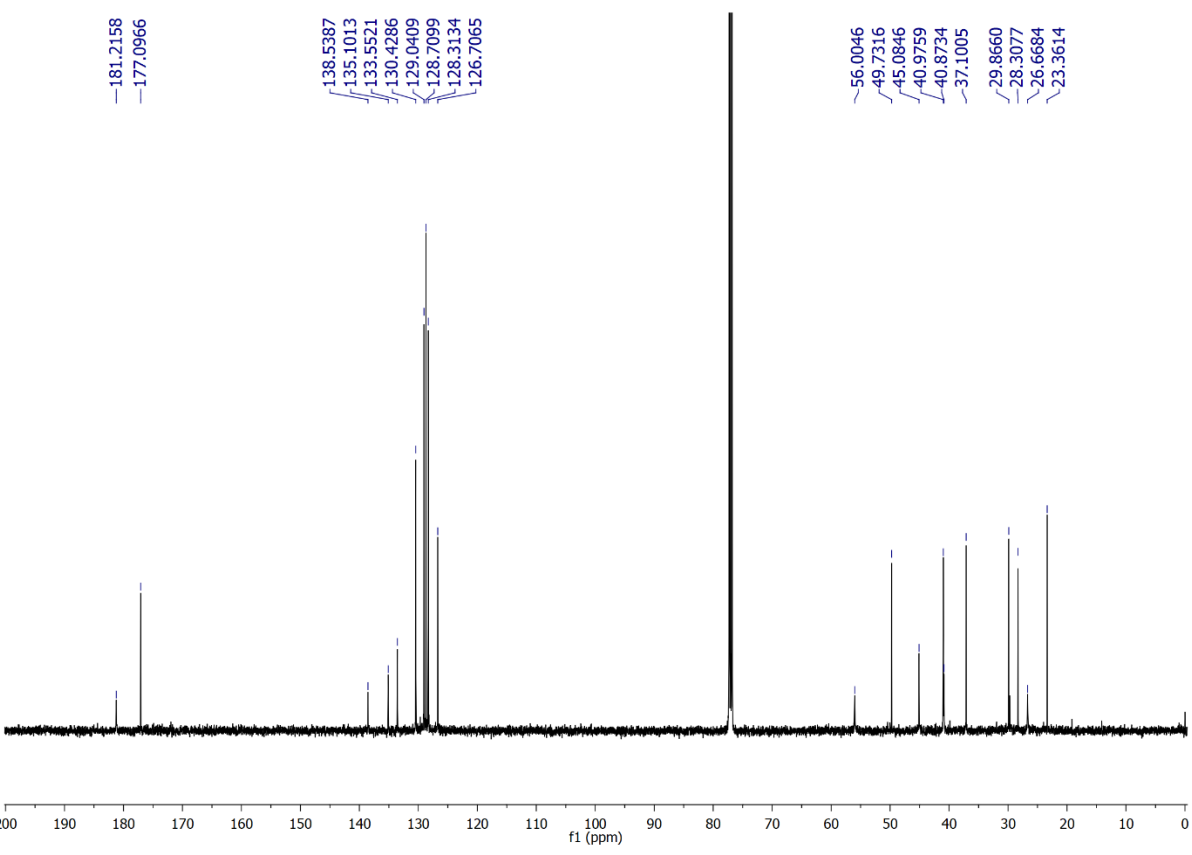

# <sup>1</sup>H and <sup>13</sup>C NMR for 8f

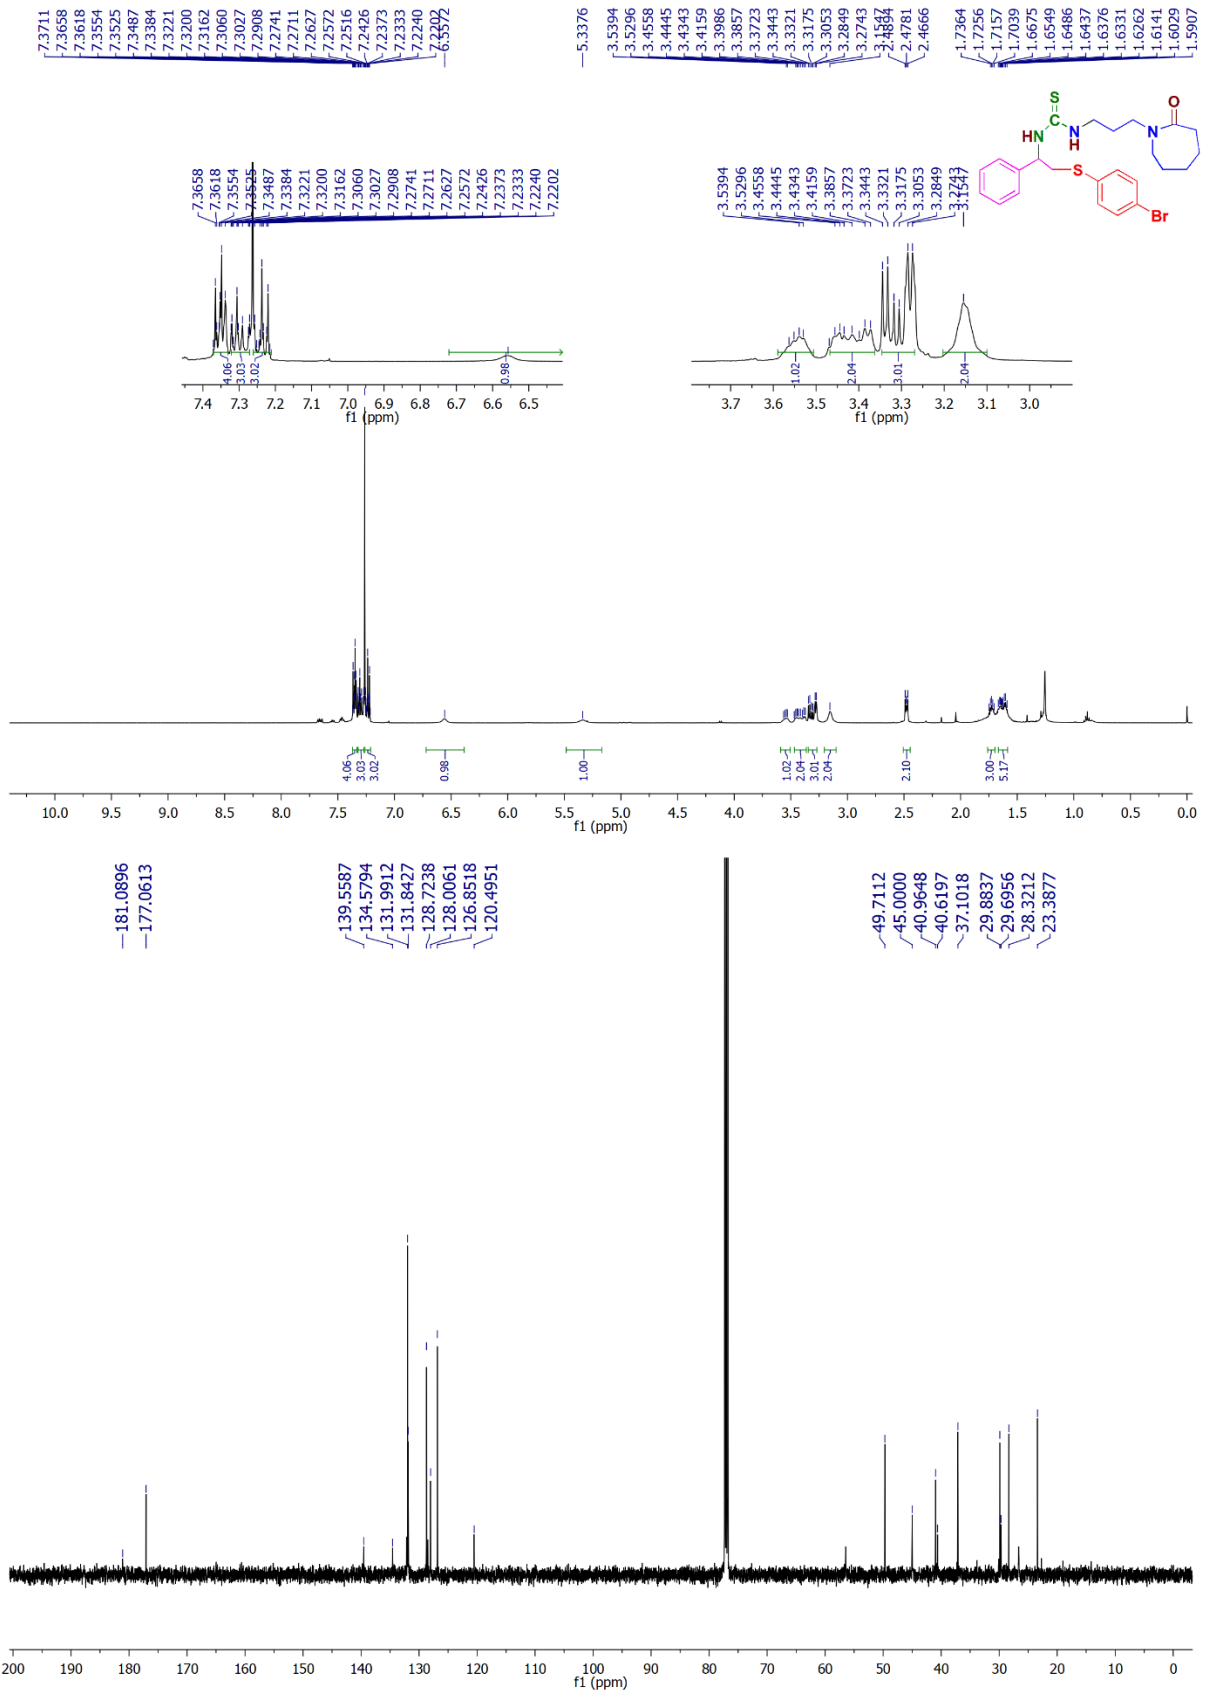



# <sup>1</sup>H and <sup>13</sup>C NMR for 8g

7.3775  
7.3747  
7.3603  
7.3528  
7.3384  
7.3180  
7.3143  
7.3037  
7.3008  
7.2939  
7.2883  
7.2833  
7.2792  
7.2618  
7.2591  
7.2565  
7.2490  
7.2445  
7.2398  
7.2396  
7.2368  
7.2324  
7.2301  
7.2276  
7.2276  
7.1453  
7.1357  
7.1317  
7.1212  
7.1173  
7.1062  
7.1020  
7.0914  
7.0886  
7.0738  
6.7527  
6.7396  
5.2904  
3.4107  
3.3313  
3.3103  
3.2986  
3.2840  
3.2688  
3.2637  
3.2515  
3.1226  
2.4710  
2.4597  
2.4483  
2.3520  
1.7267  
1.7149  
1.7036  
1.6962  
1.6841  
1.6743  
1.6697  
1.6589  
1.6458  
1.6342  
1.6232  
1.6123  
1.6038  
1.5923  
1.5808  
1.5698  
1.5599

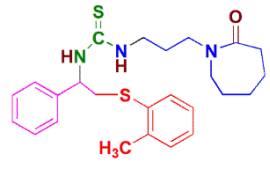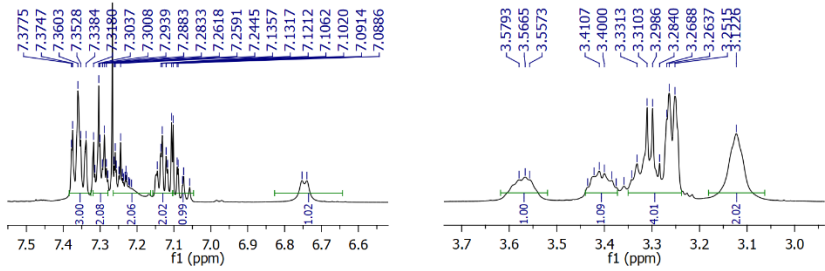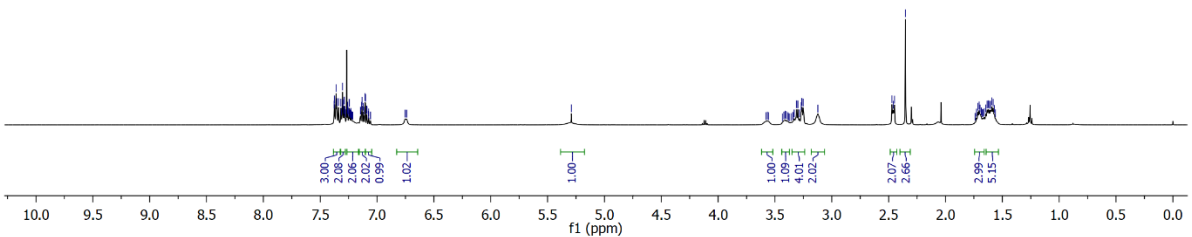

181.1203  
176.8928  
139.9199  
138.5253  
134.6216  
131.1267  
130.2199  
129.7775  
128.8859  
126.8857  
126.5603  
56.5570  
48.7187  
45.0025  
41.1628  
40.2757  
37.1003  
29.8740  
28.3651  
26.7997  
23.3716  
20.5994

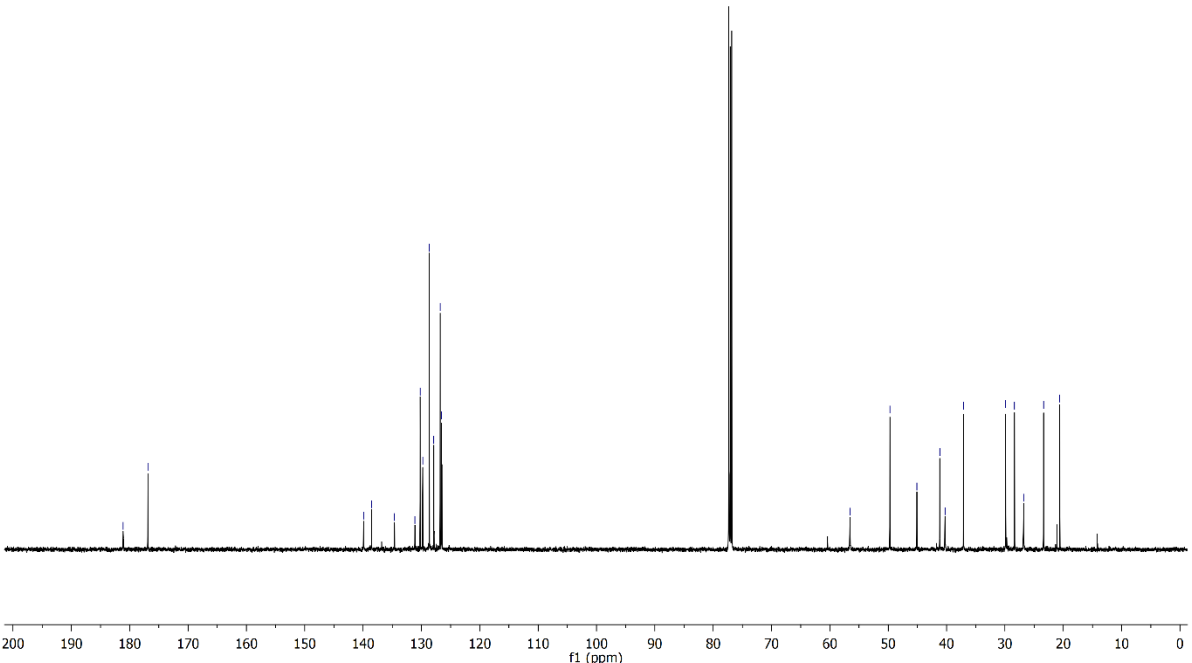

# <sup>1</sup>H and <sup>13</sup>C NMR for 8h

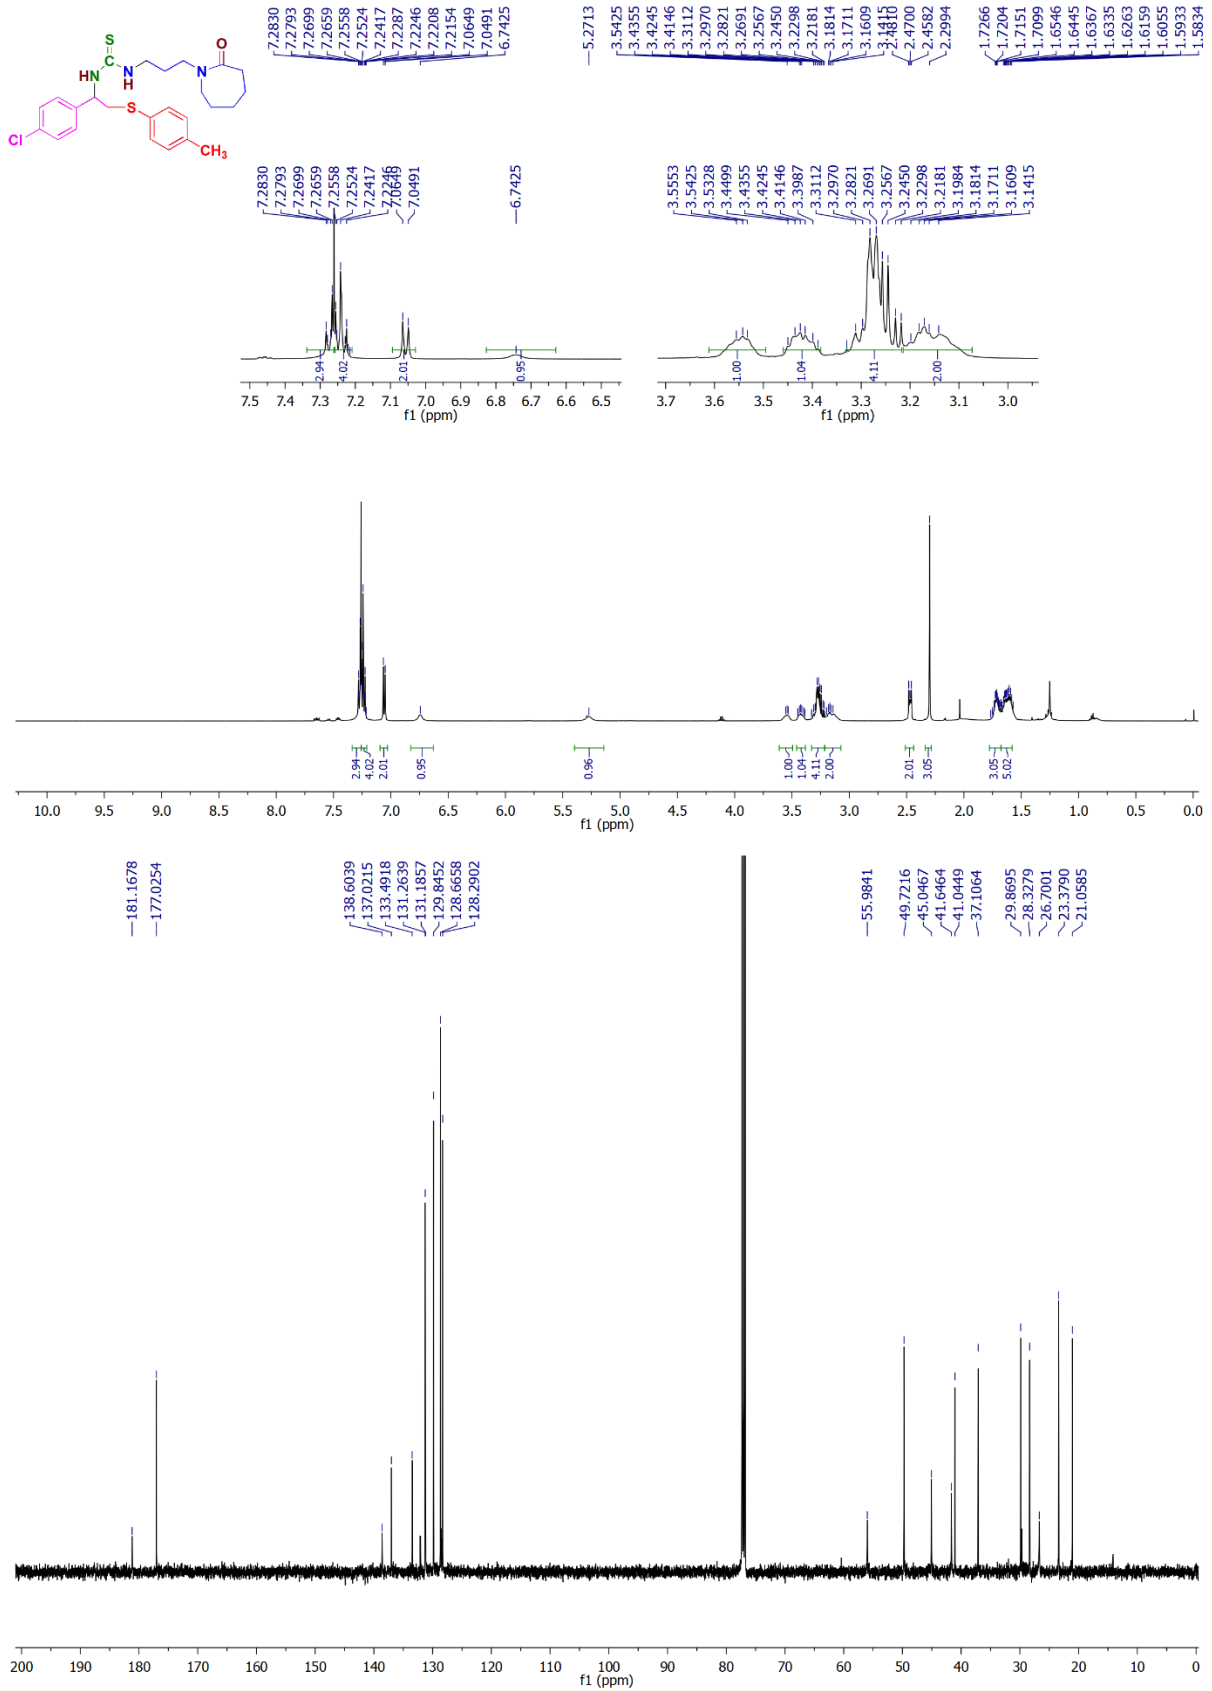

# <sup>1</sup>H and <sup>13</sup>C NMR for 8i

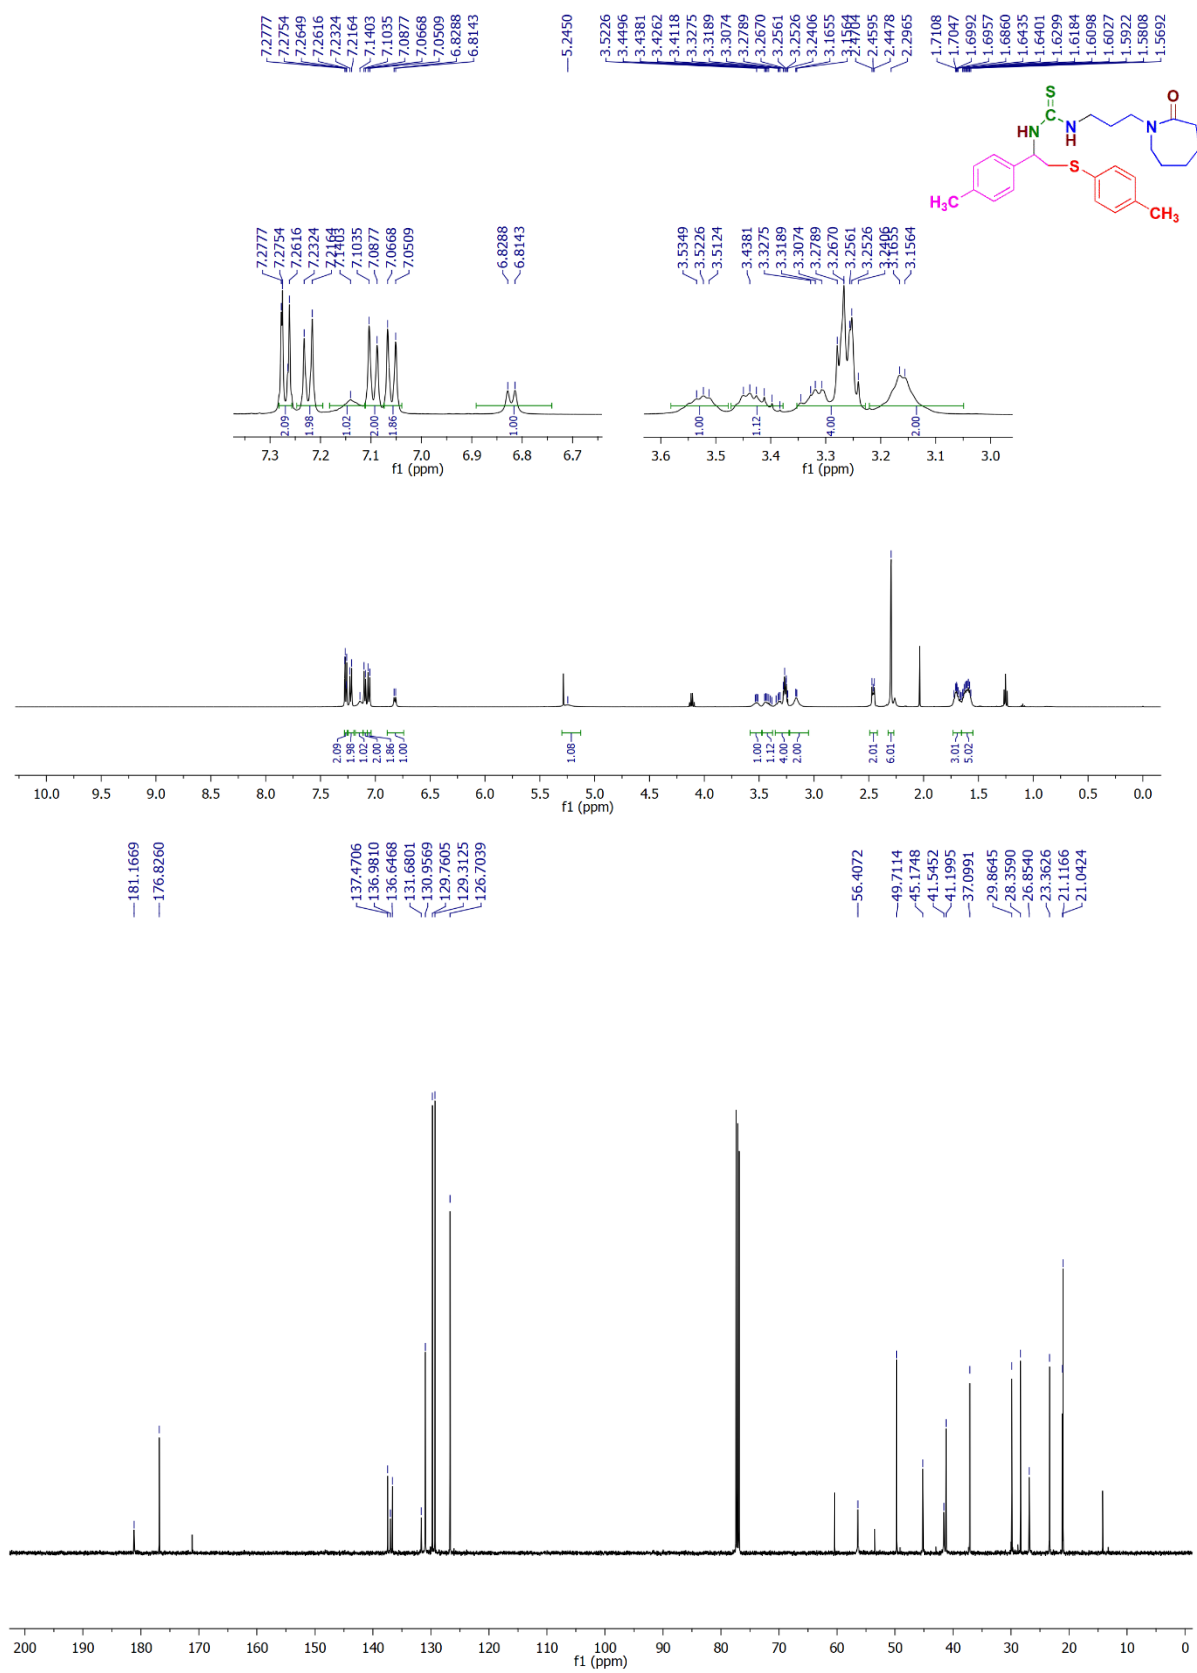

# <sup>1</sup>H and <sup>13</sup>C NMR for 10a

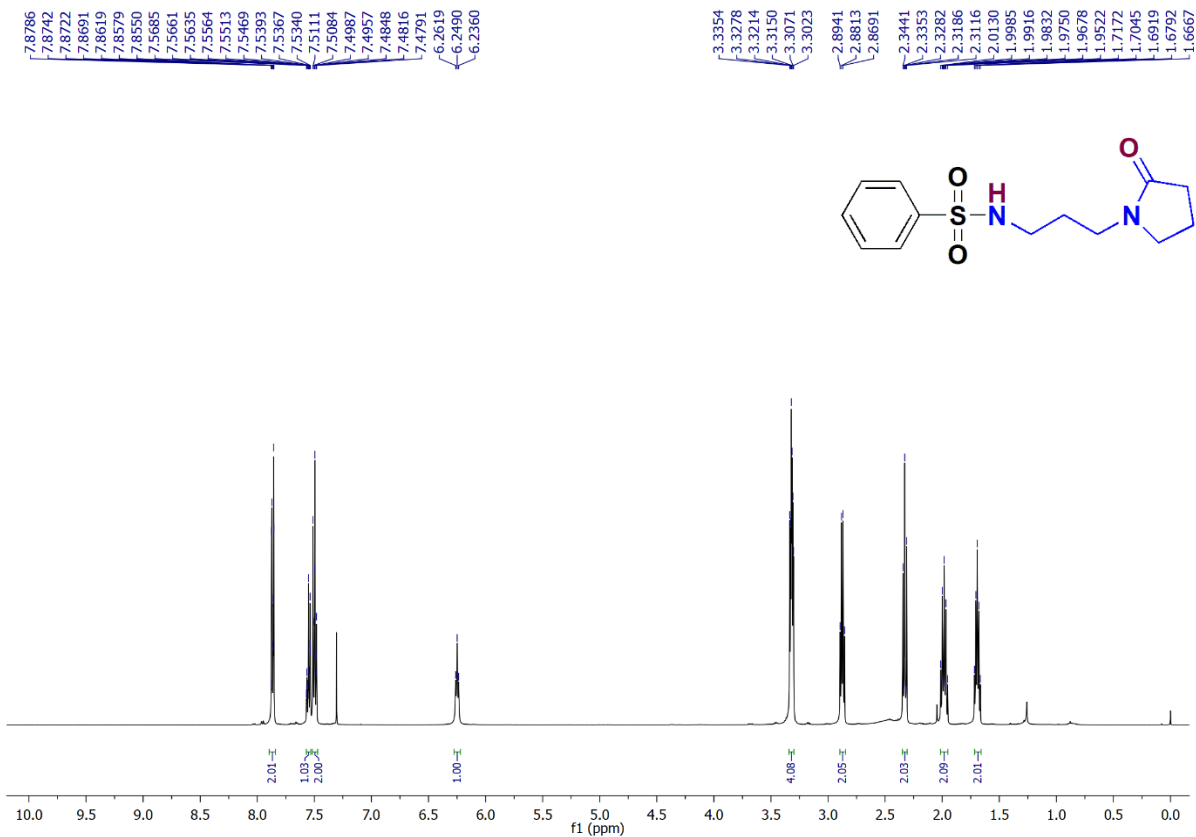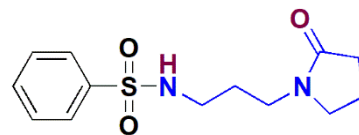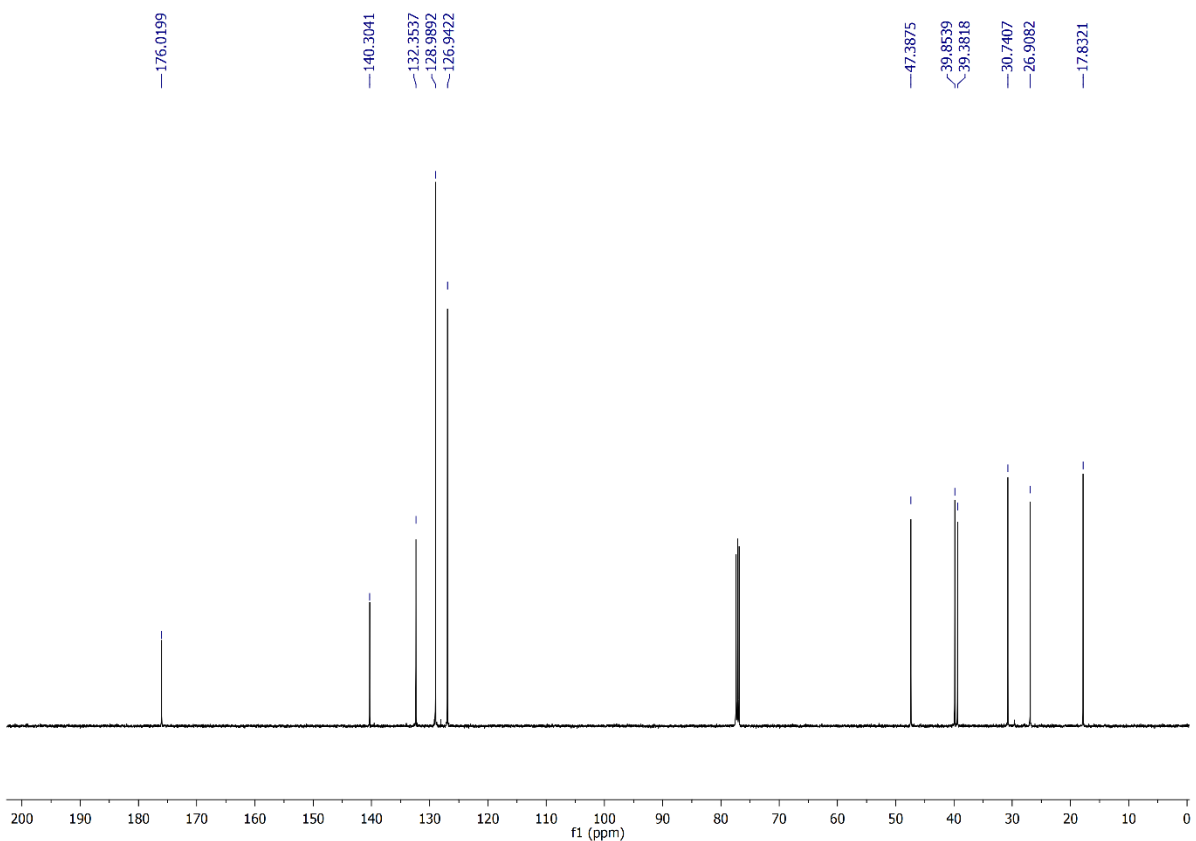

# <sup>1</sup>H and <sup>13</sup>C NMR for 10b

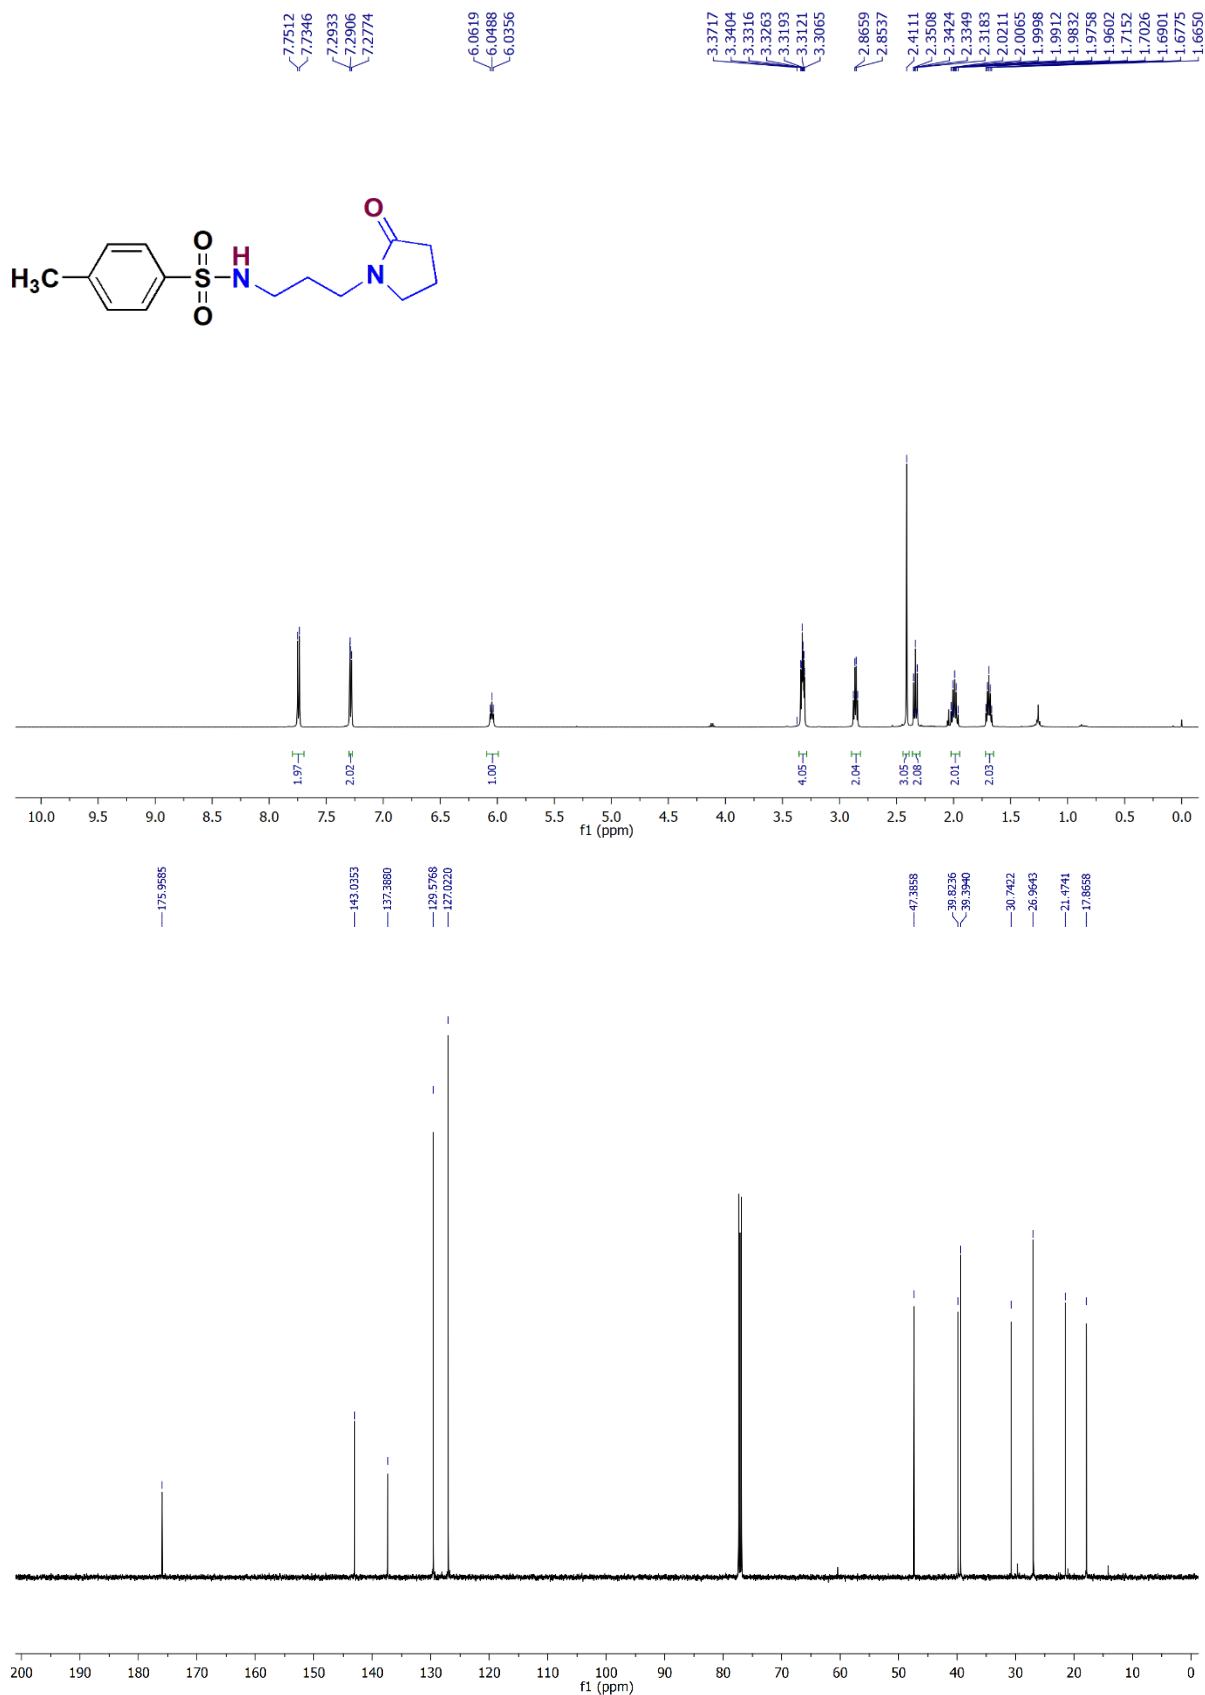

# <sup>1</sup>H and <sup>13</sup>C NMR for 10c

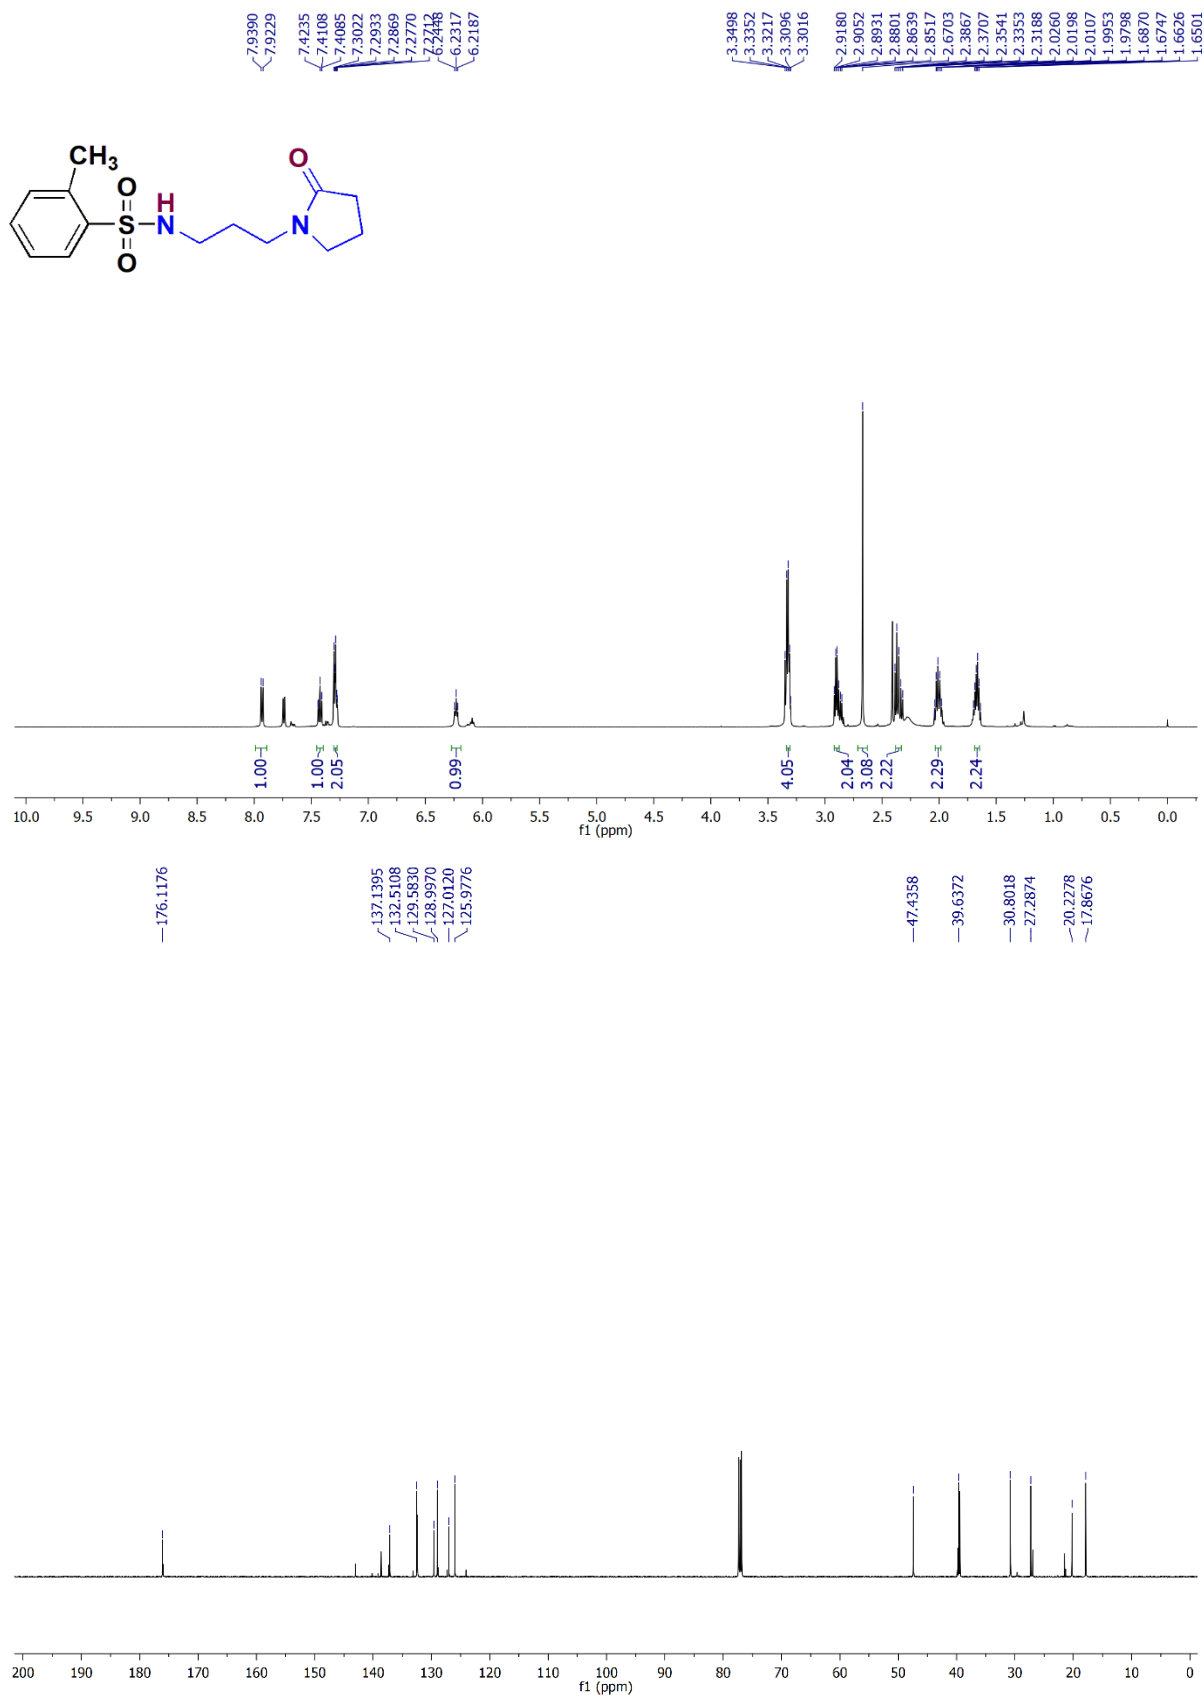

# <sup>1</sup>H and <sup>13</sup>C NMR for 10d

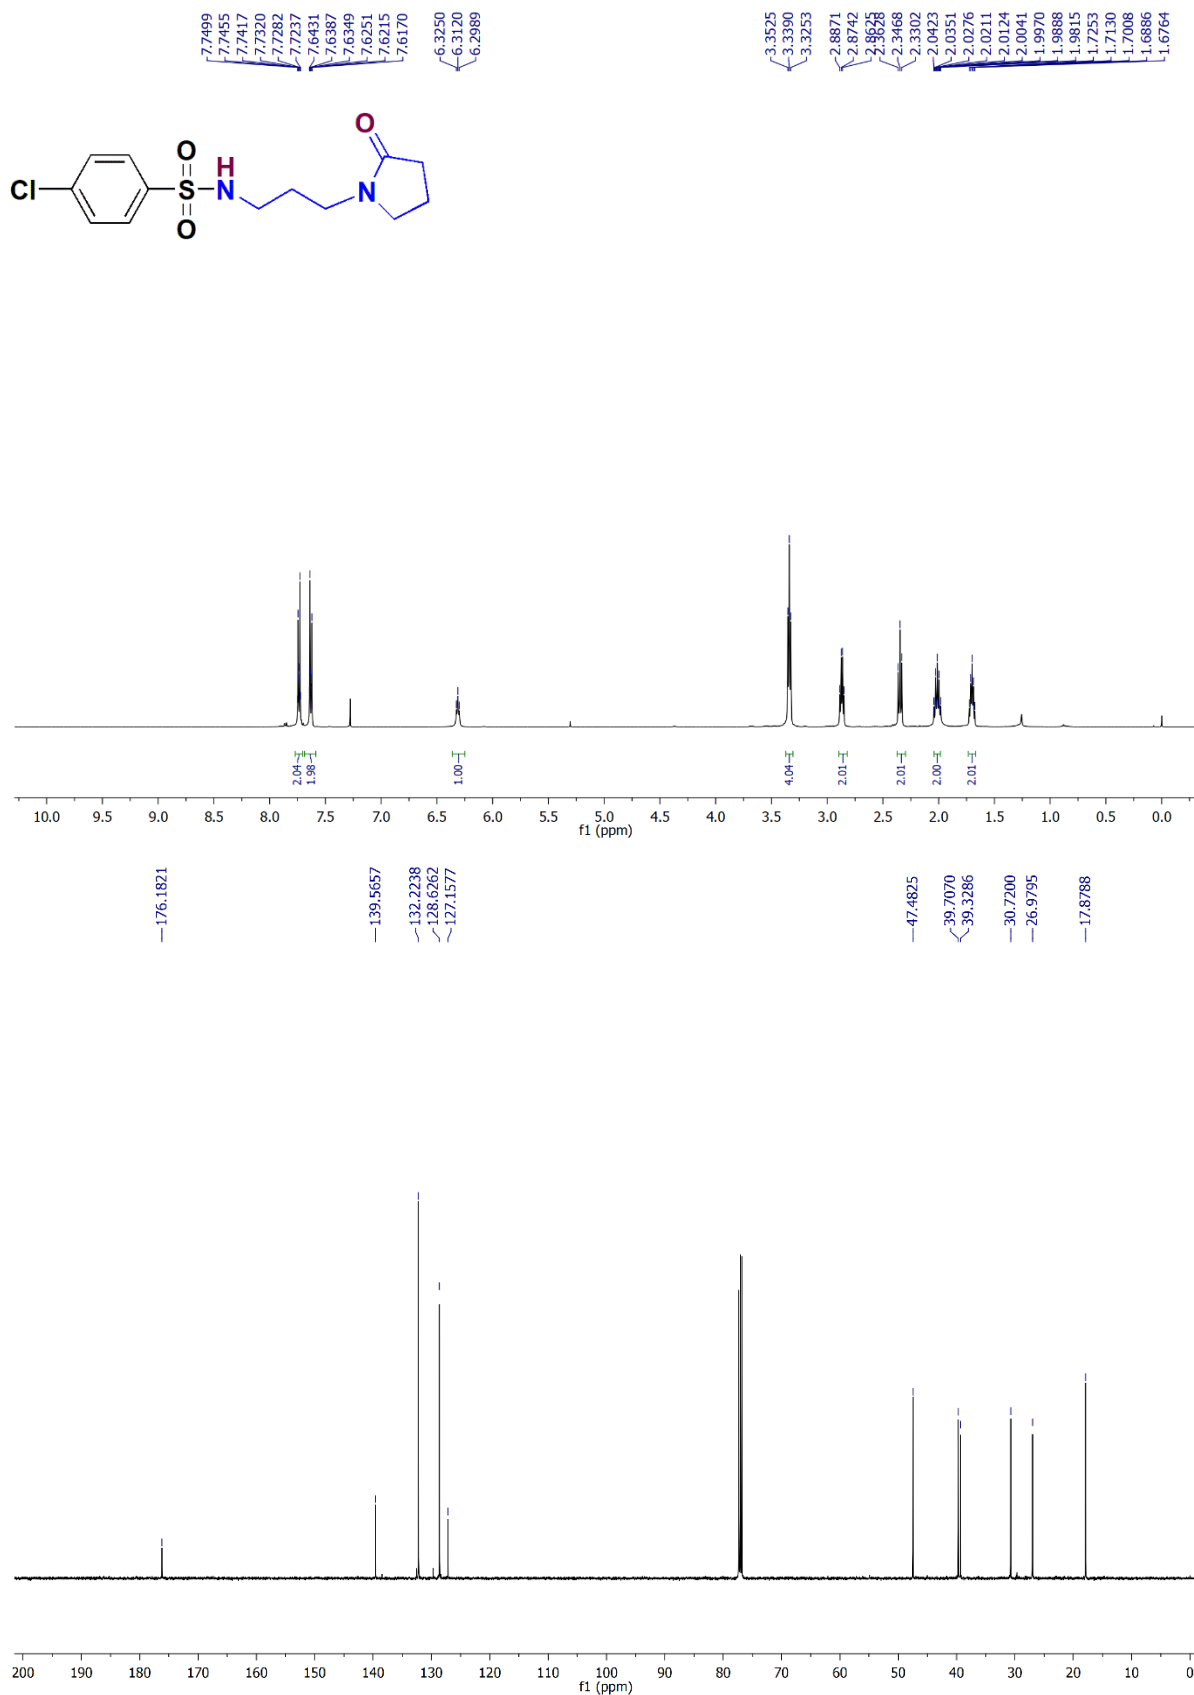

# <sup>1</sup>H and <sup>13</sup>C NMR for 10e

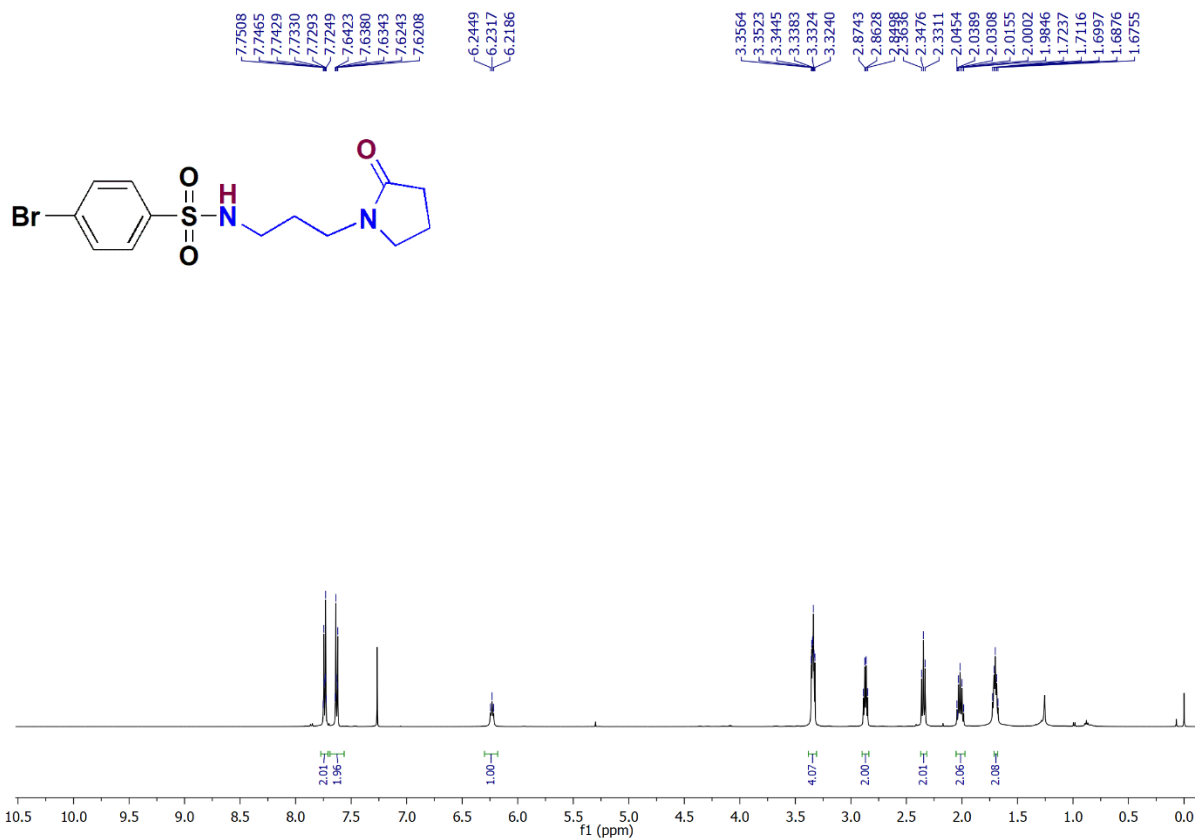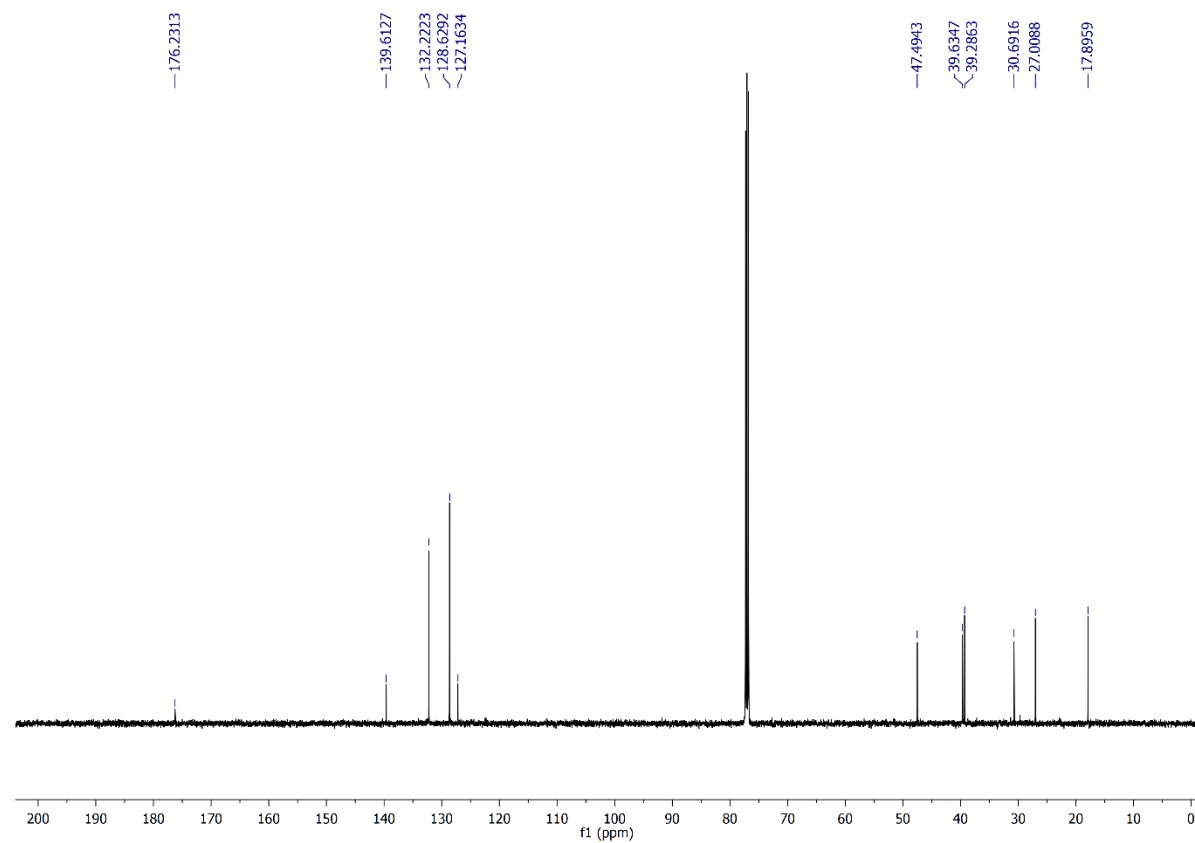



# <sup>1</sup>H and <sup>13</sup>C NMR for 11a

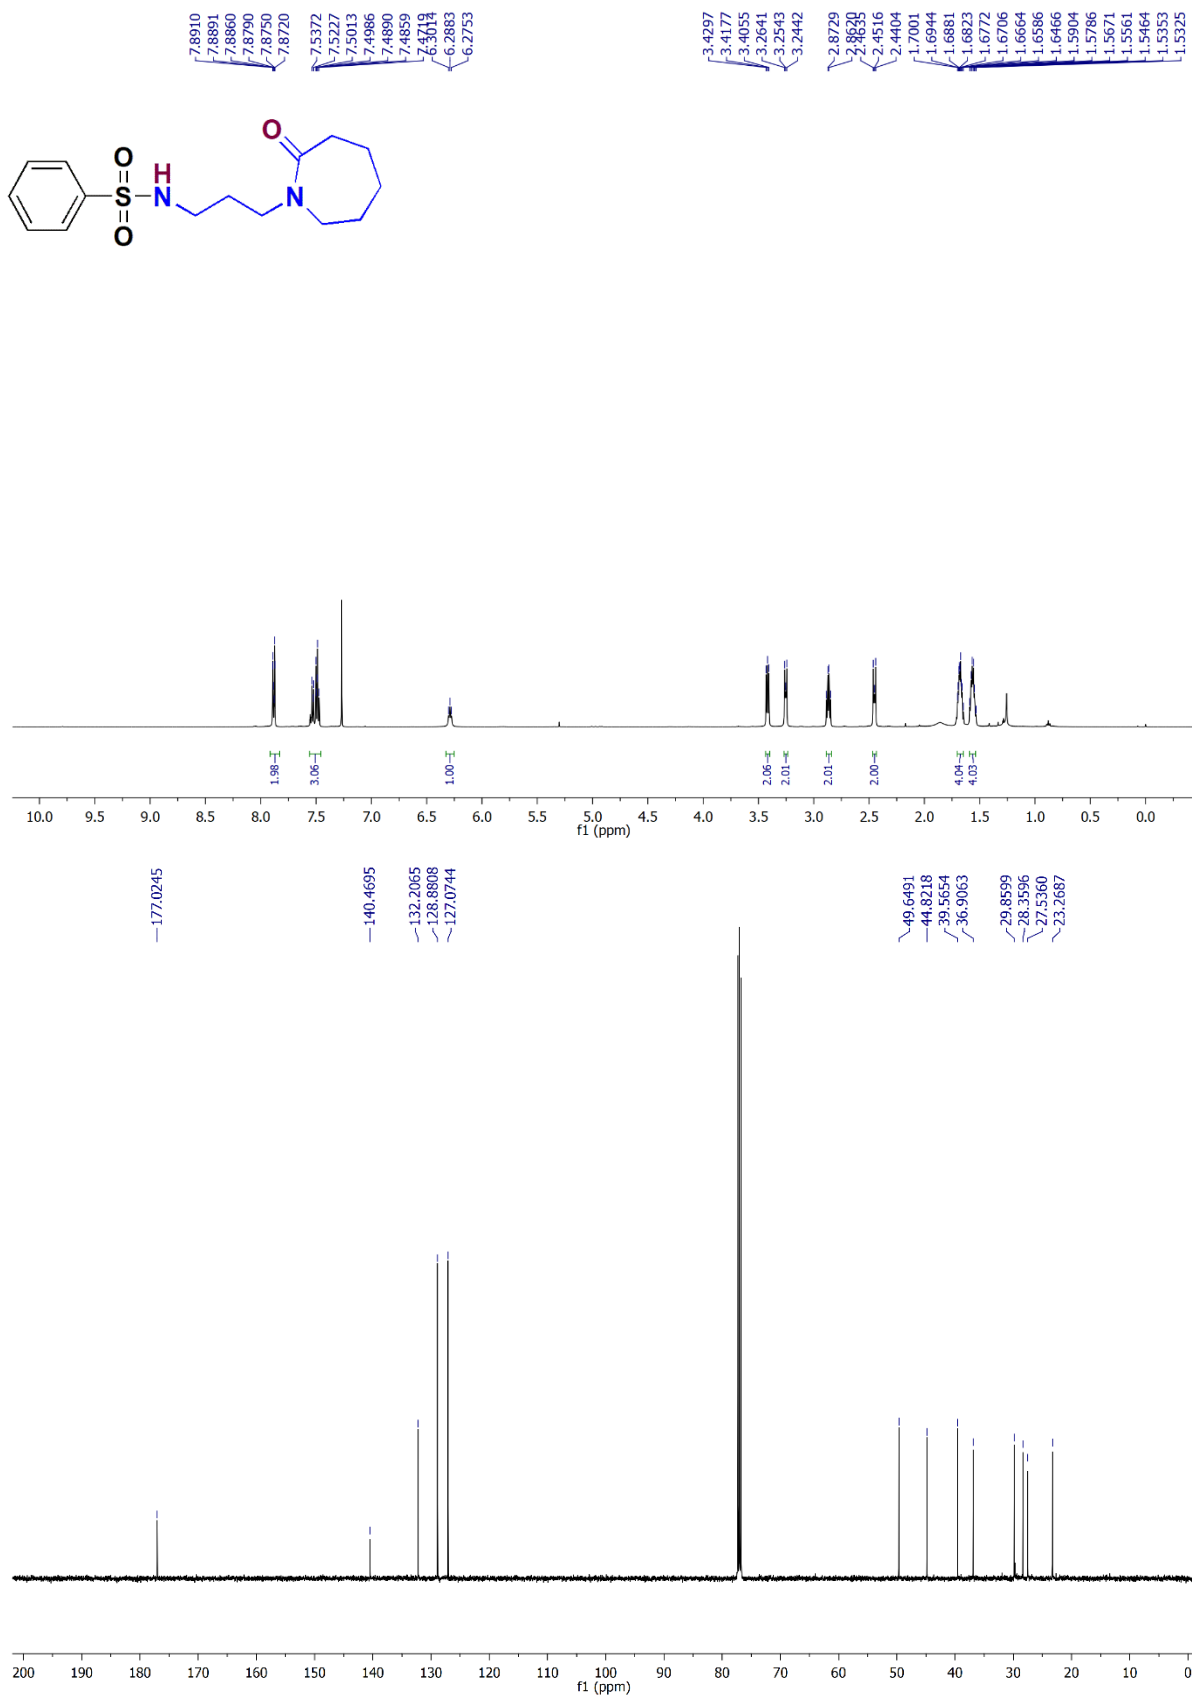

# <sup>1</sup>H and <sup>13</sup>C NMR for 11b

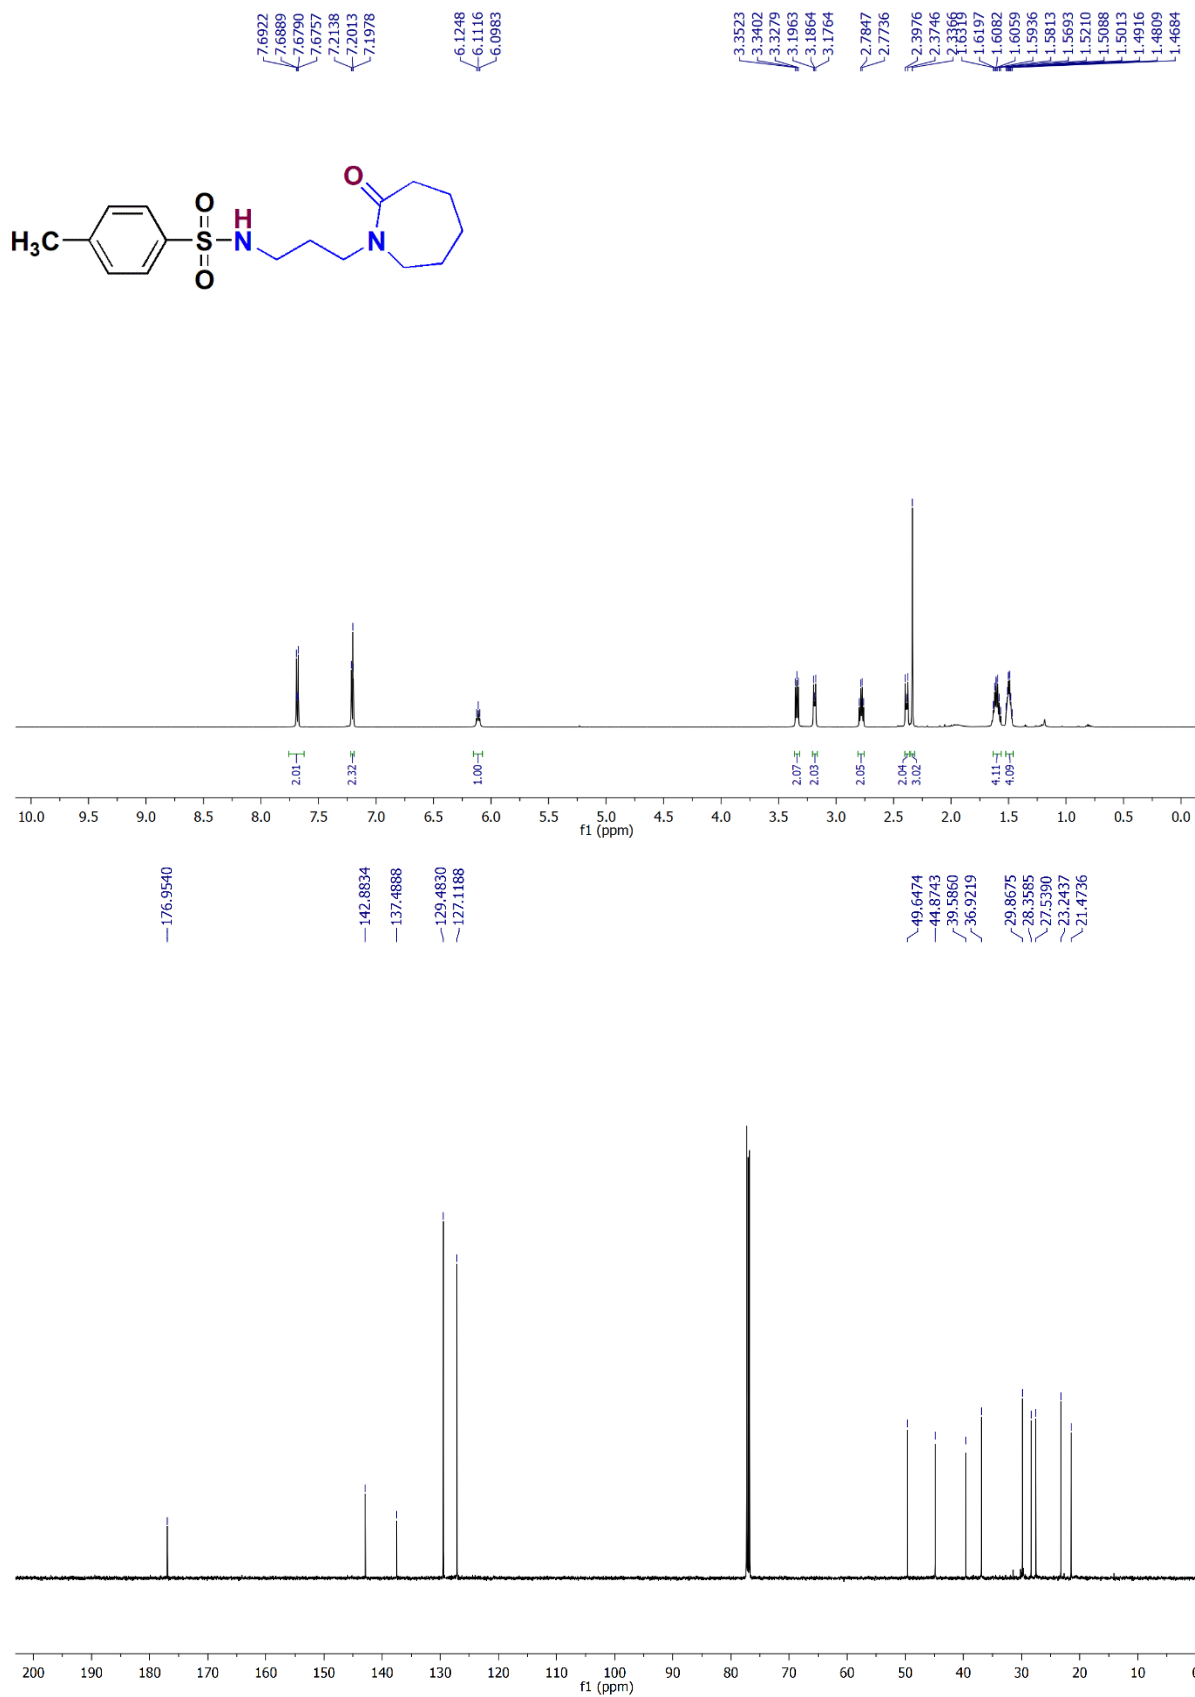

# <sup>1</sup>H and <sup>13</sup>C NMR for 11c

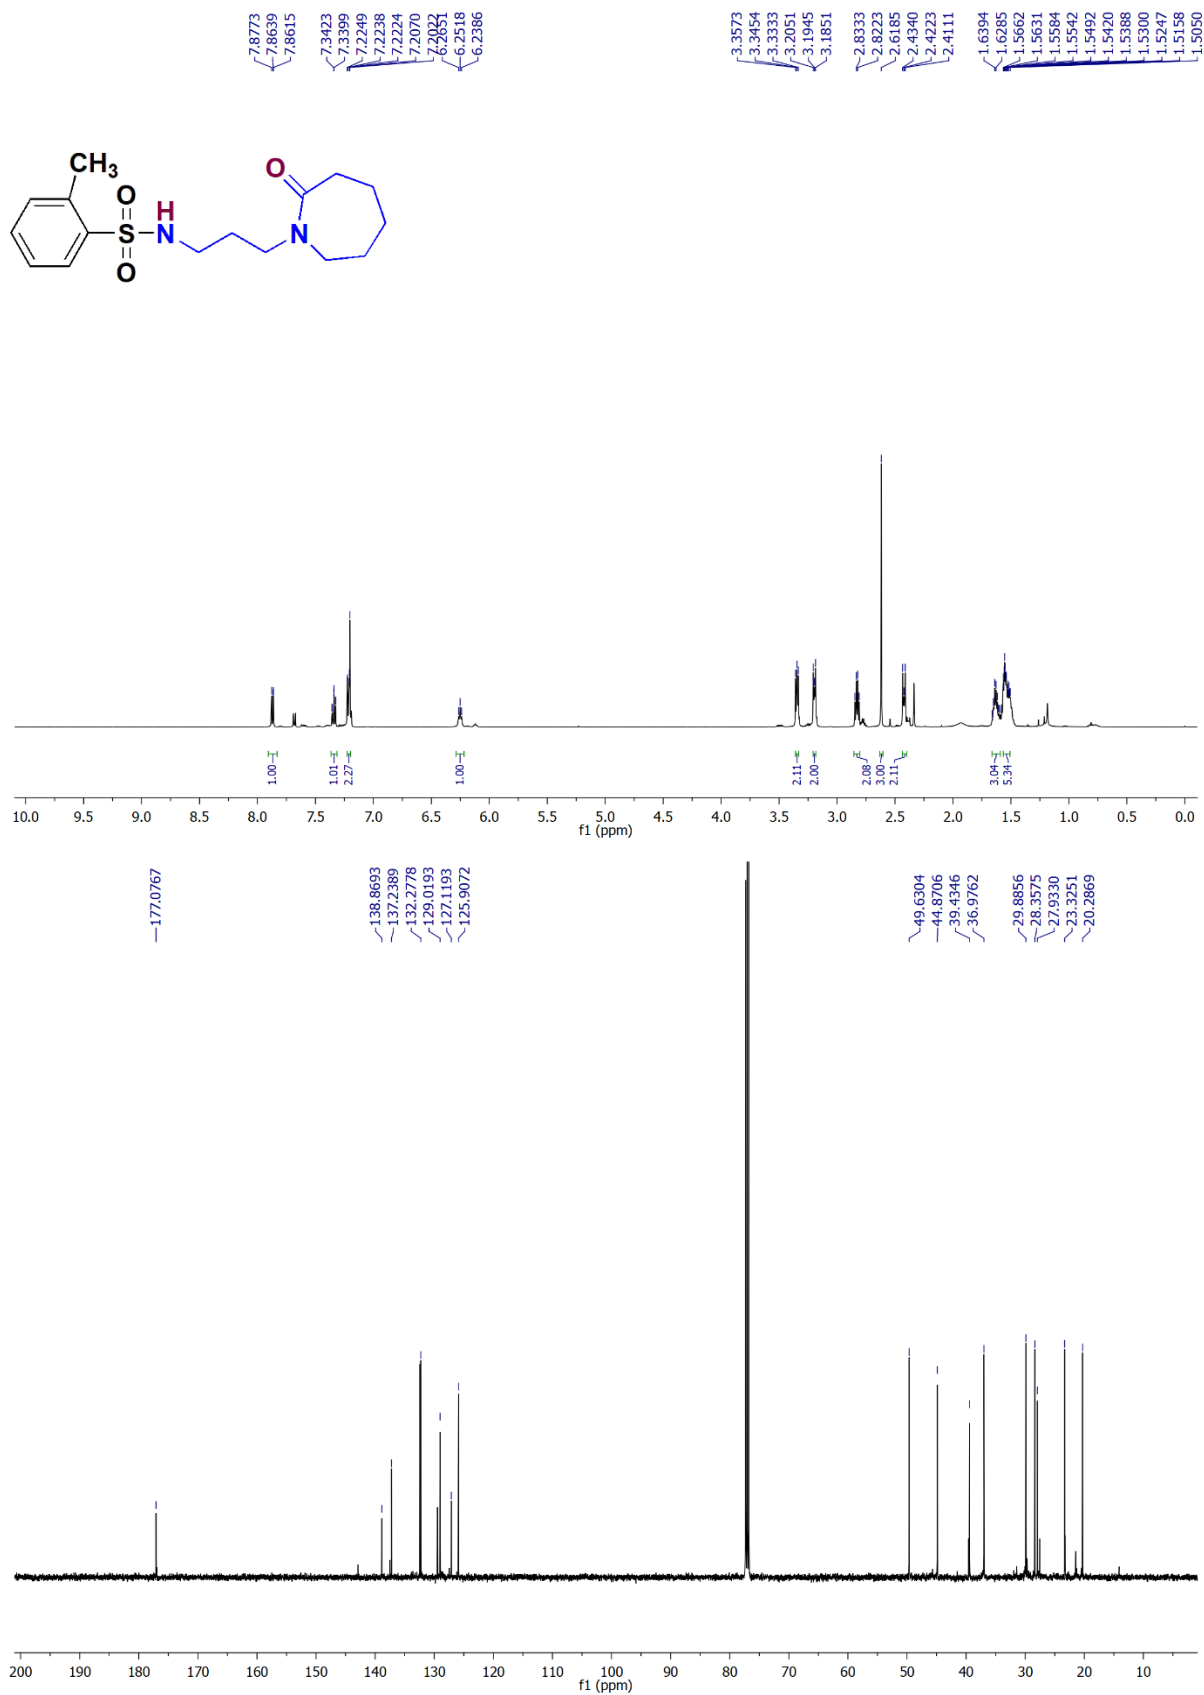

# <sup>1</sup>H and <sup>13</sup>C NMR for 11d

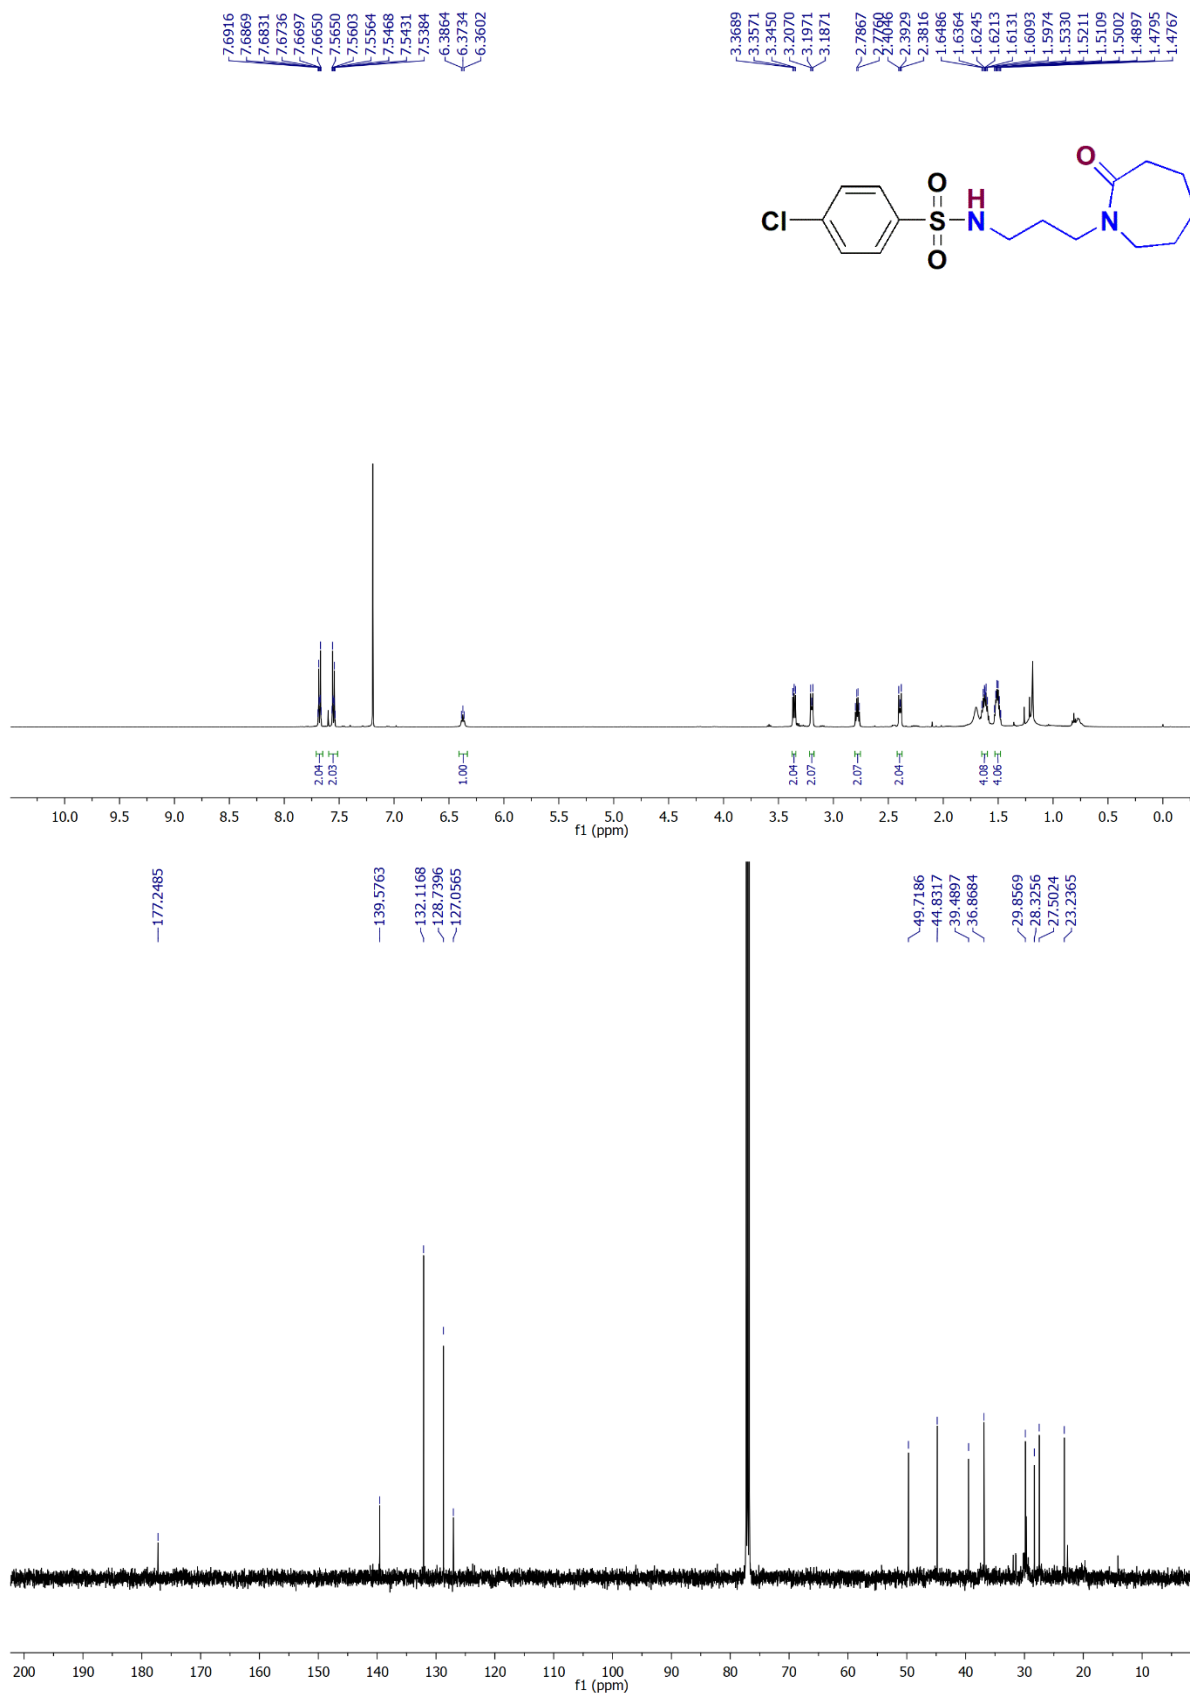

# <sup>1</sup>H and <sup>13</sup>C NMR for 11e

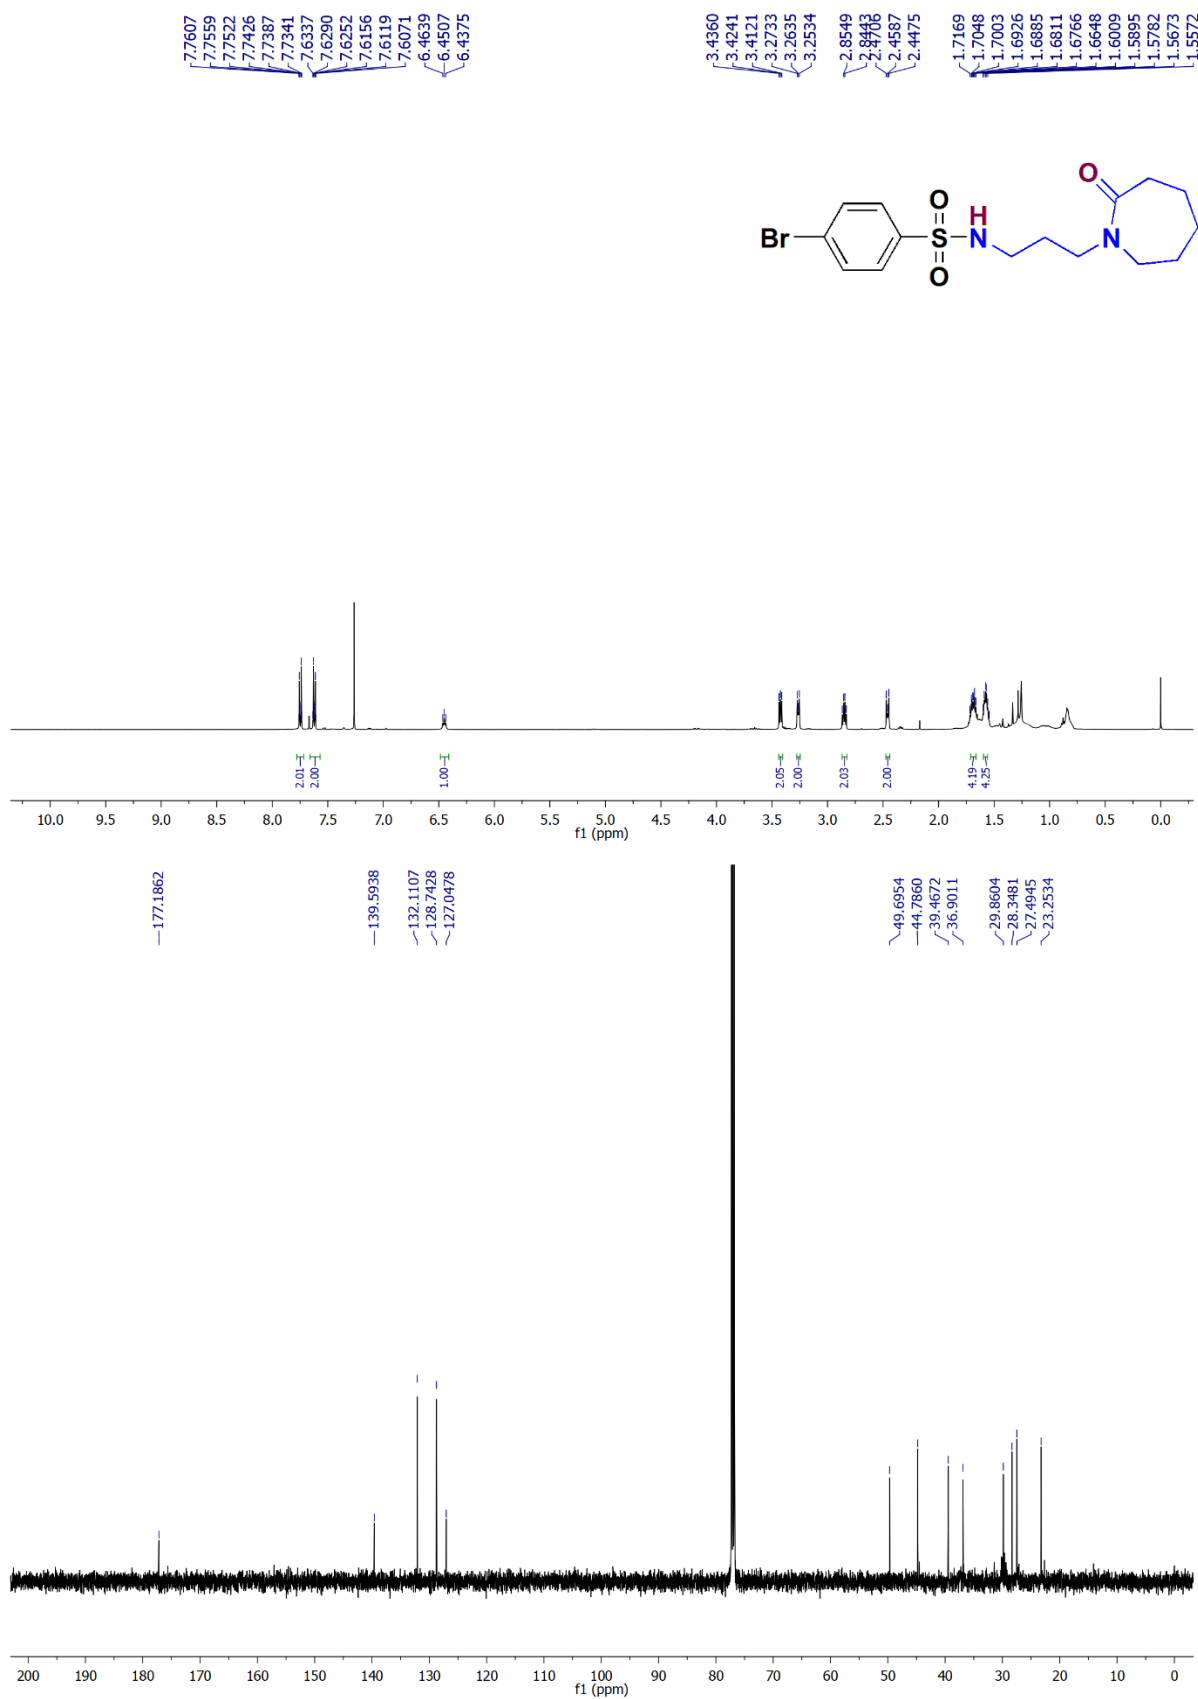

# <sup>1</sup>H and <sup>13</sup>C NMR for 14a

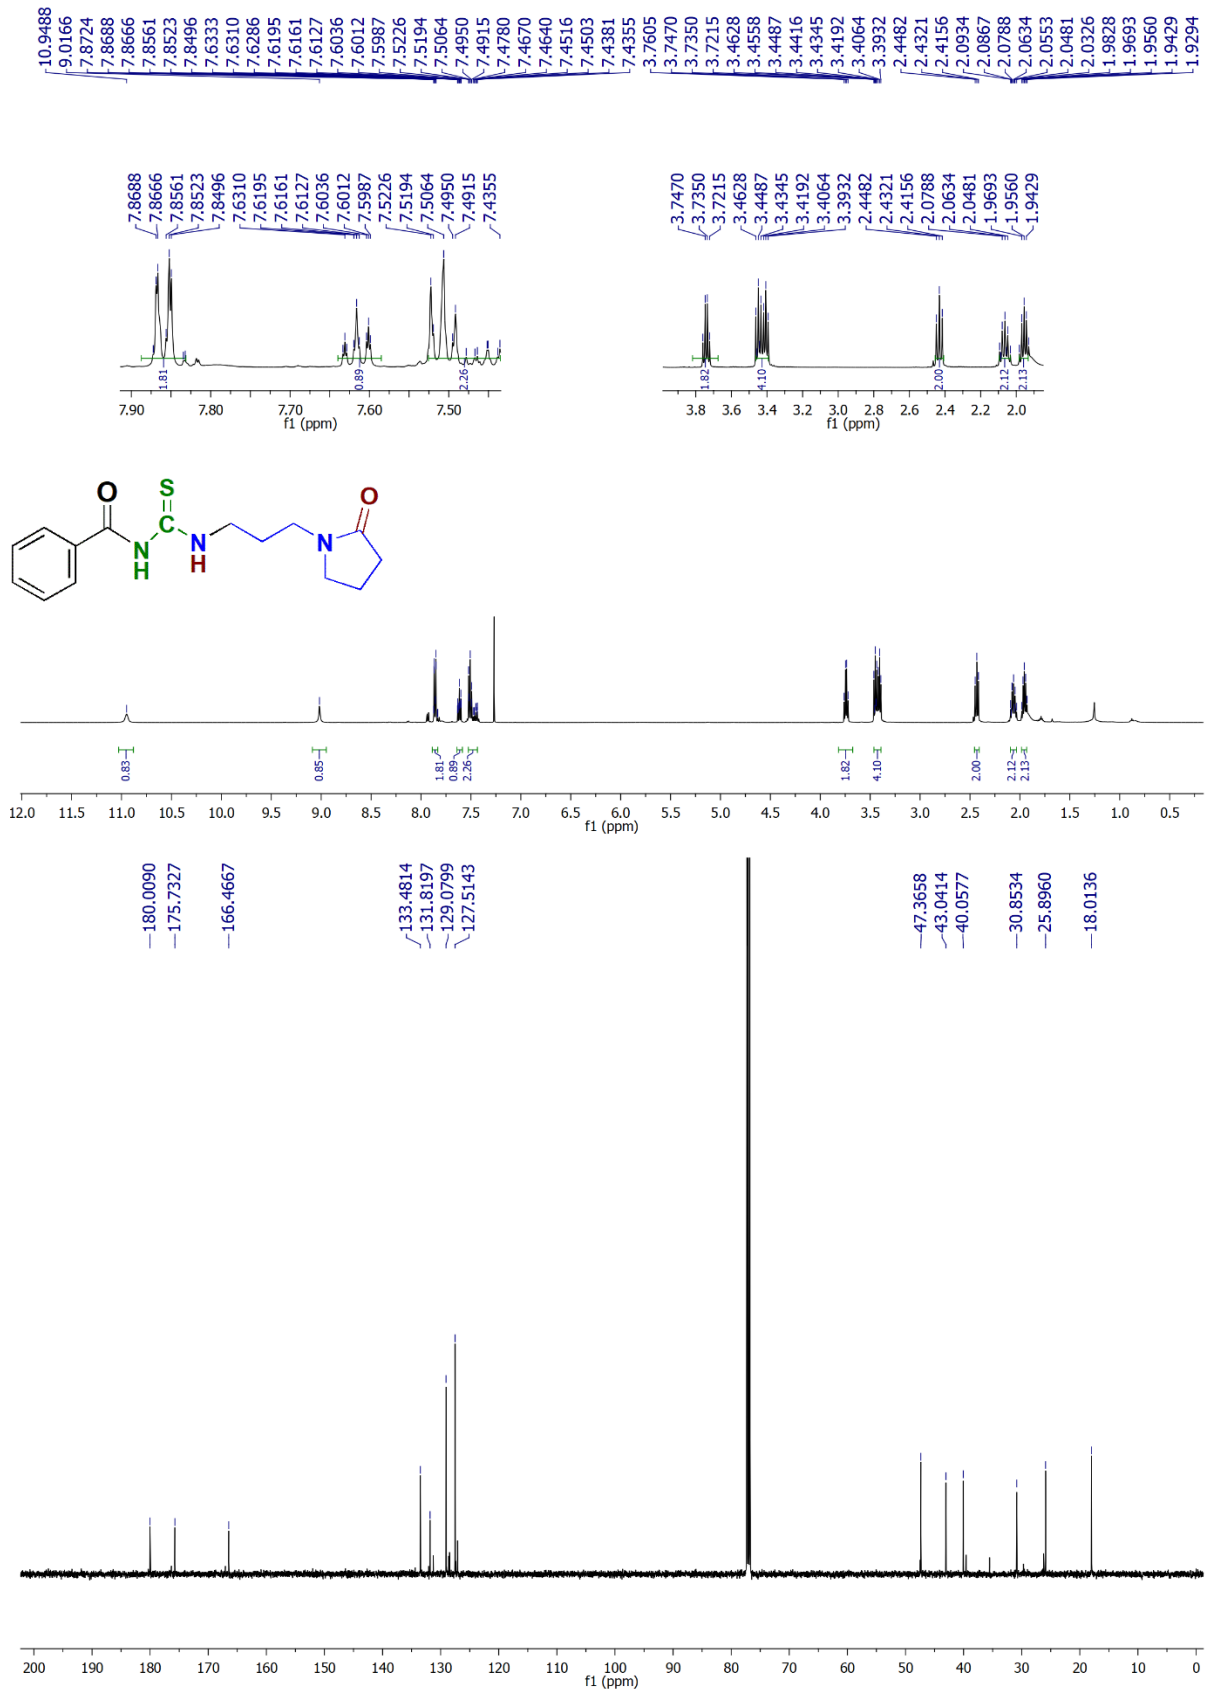

# <sup>1</sup>H and <sup>13</sup>C NMR for 14b

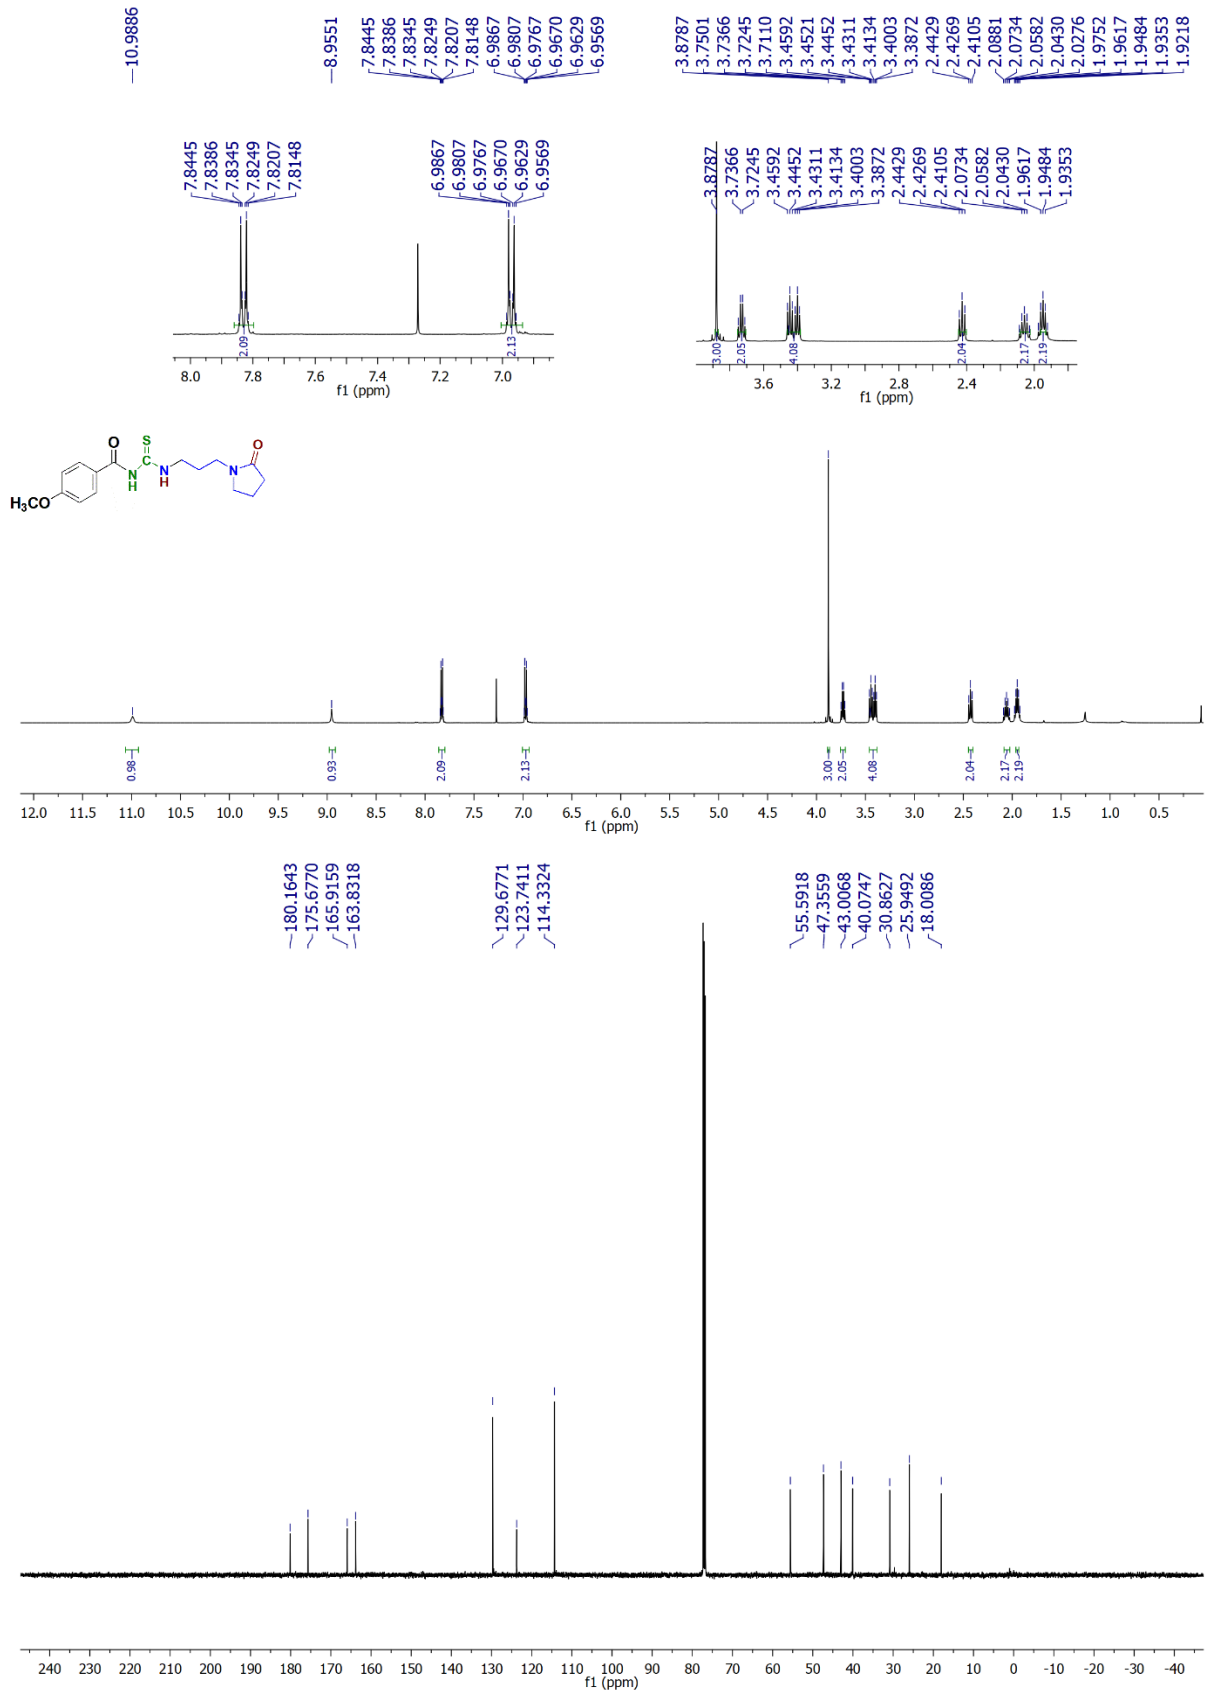

# <sup>1</sup>H and <sup>13</sup>C NMR for 15a

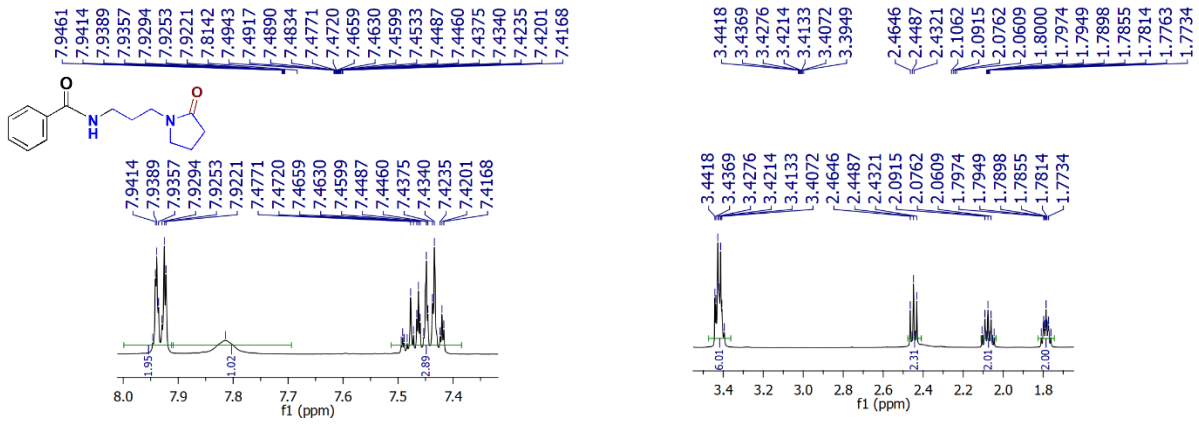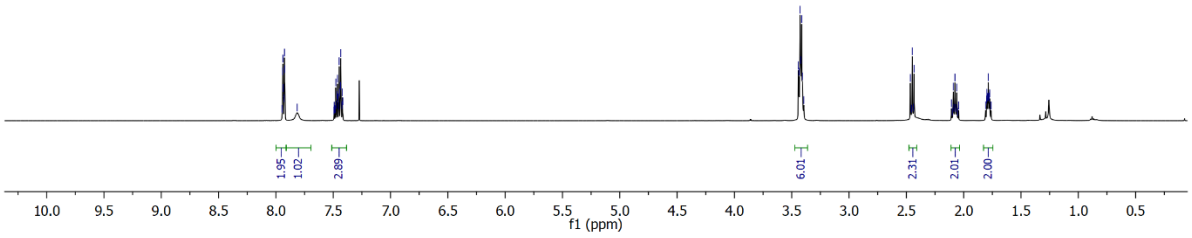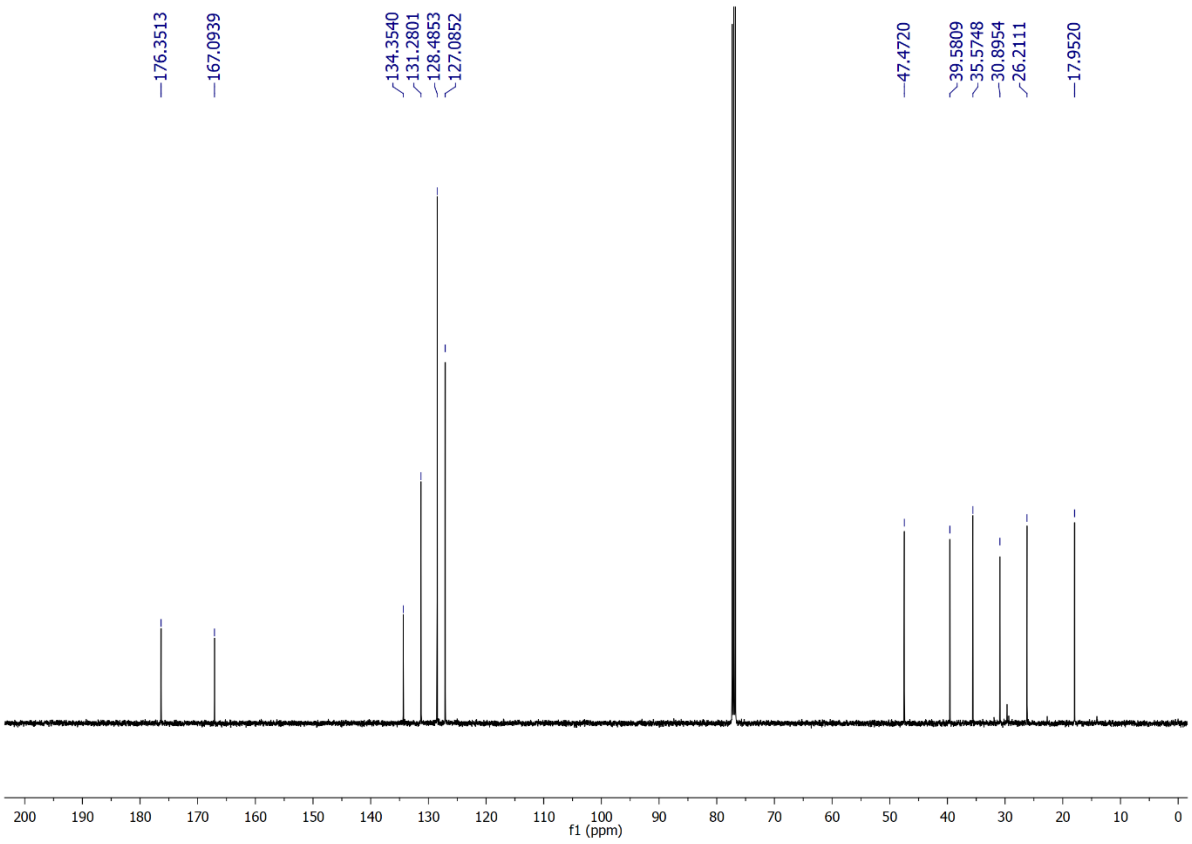



# <sup>1</sup>H and <sup>13</sup>C NMR for 15b

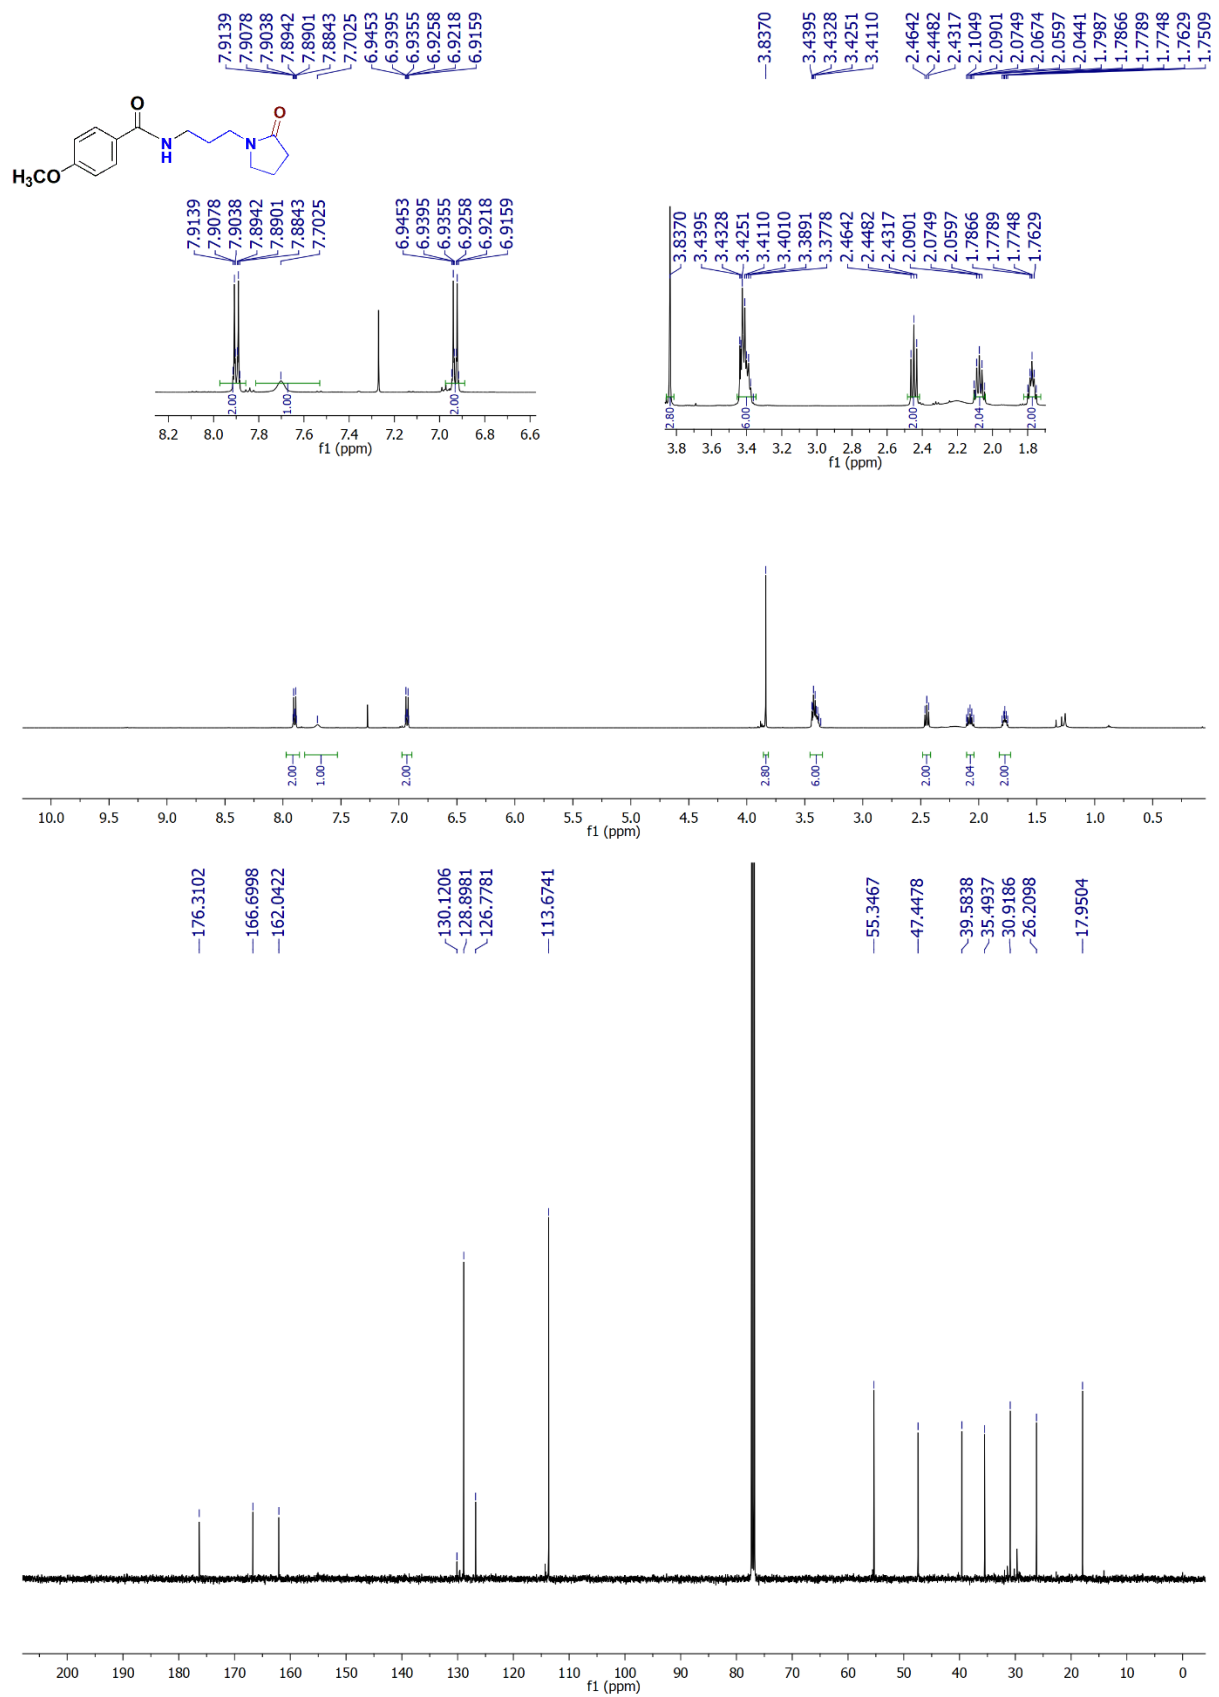

# <sup>1</sup>H and <sup>13</sup>C NMR for 16a

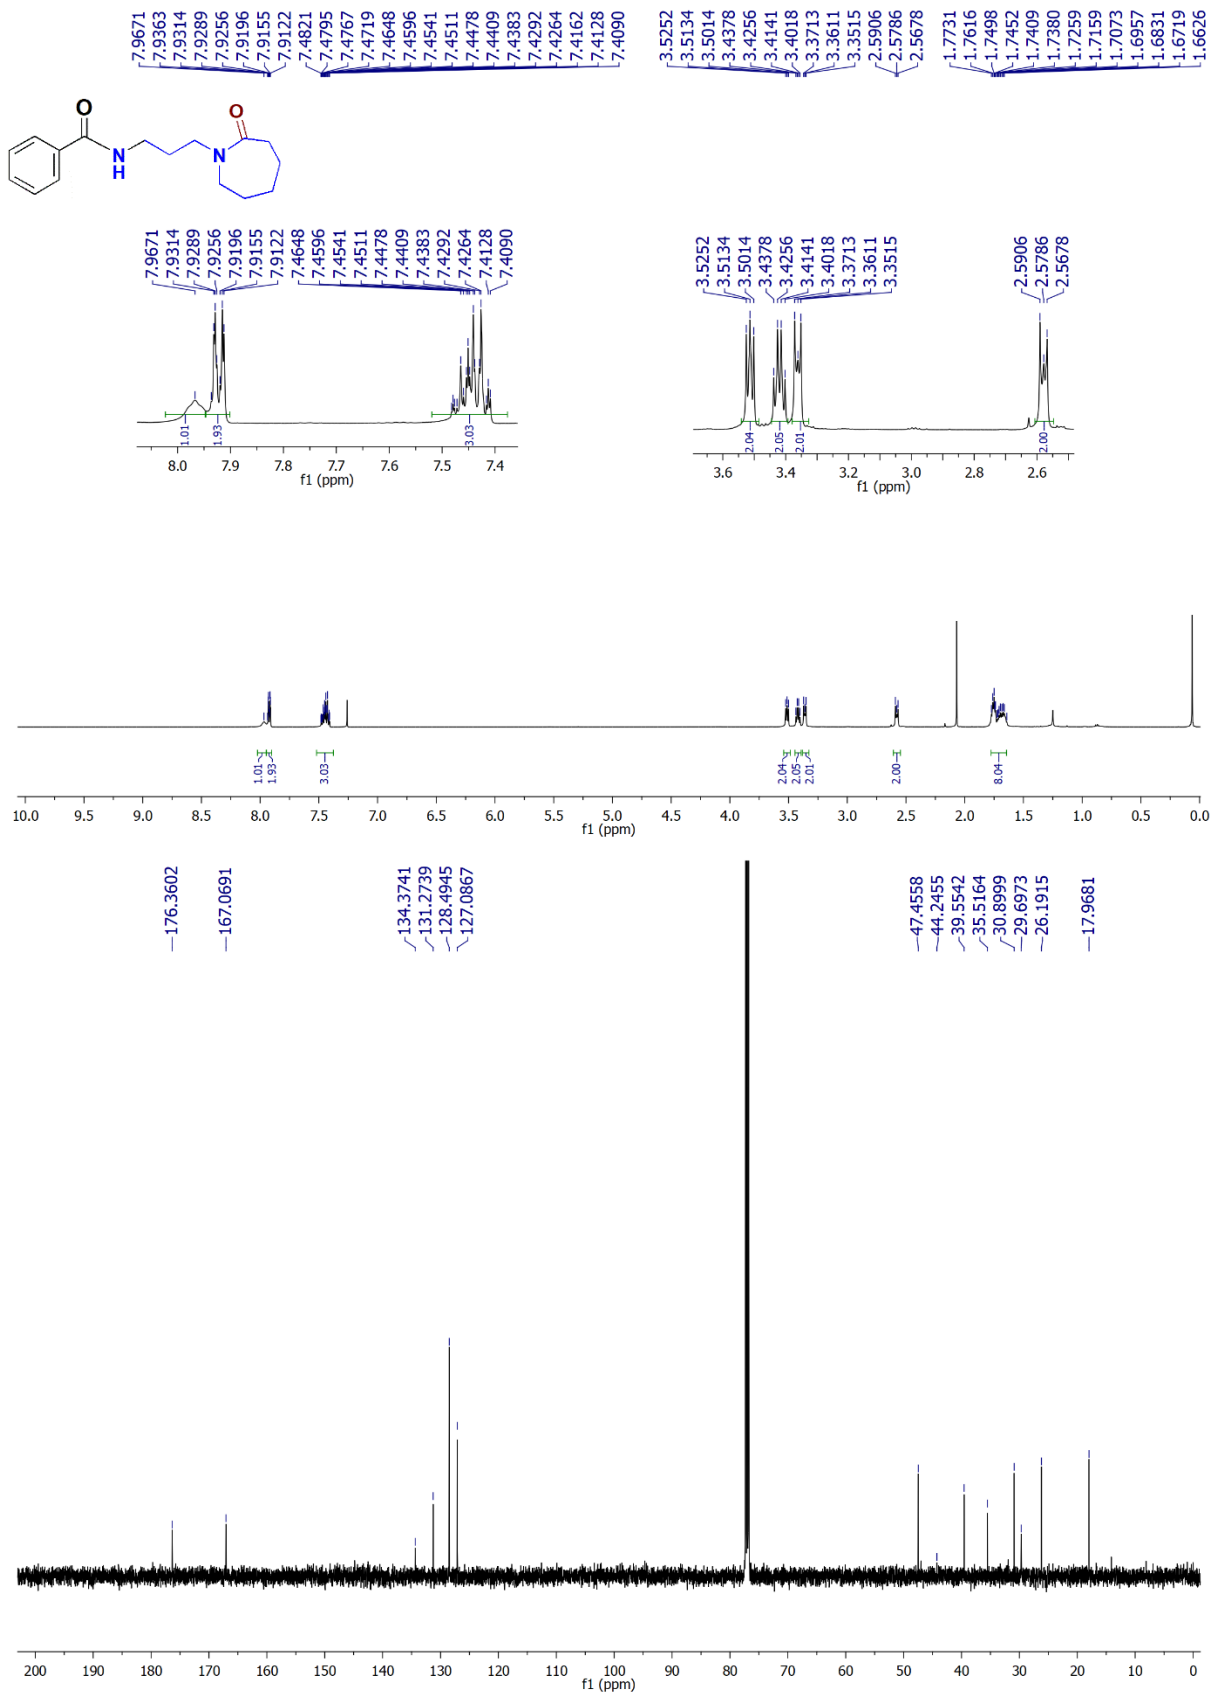

# <sup>1</sup>H and <sup>13</sup>C NMR for 16b

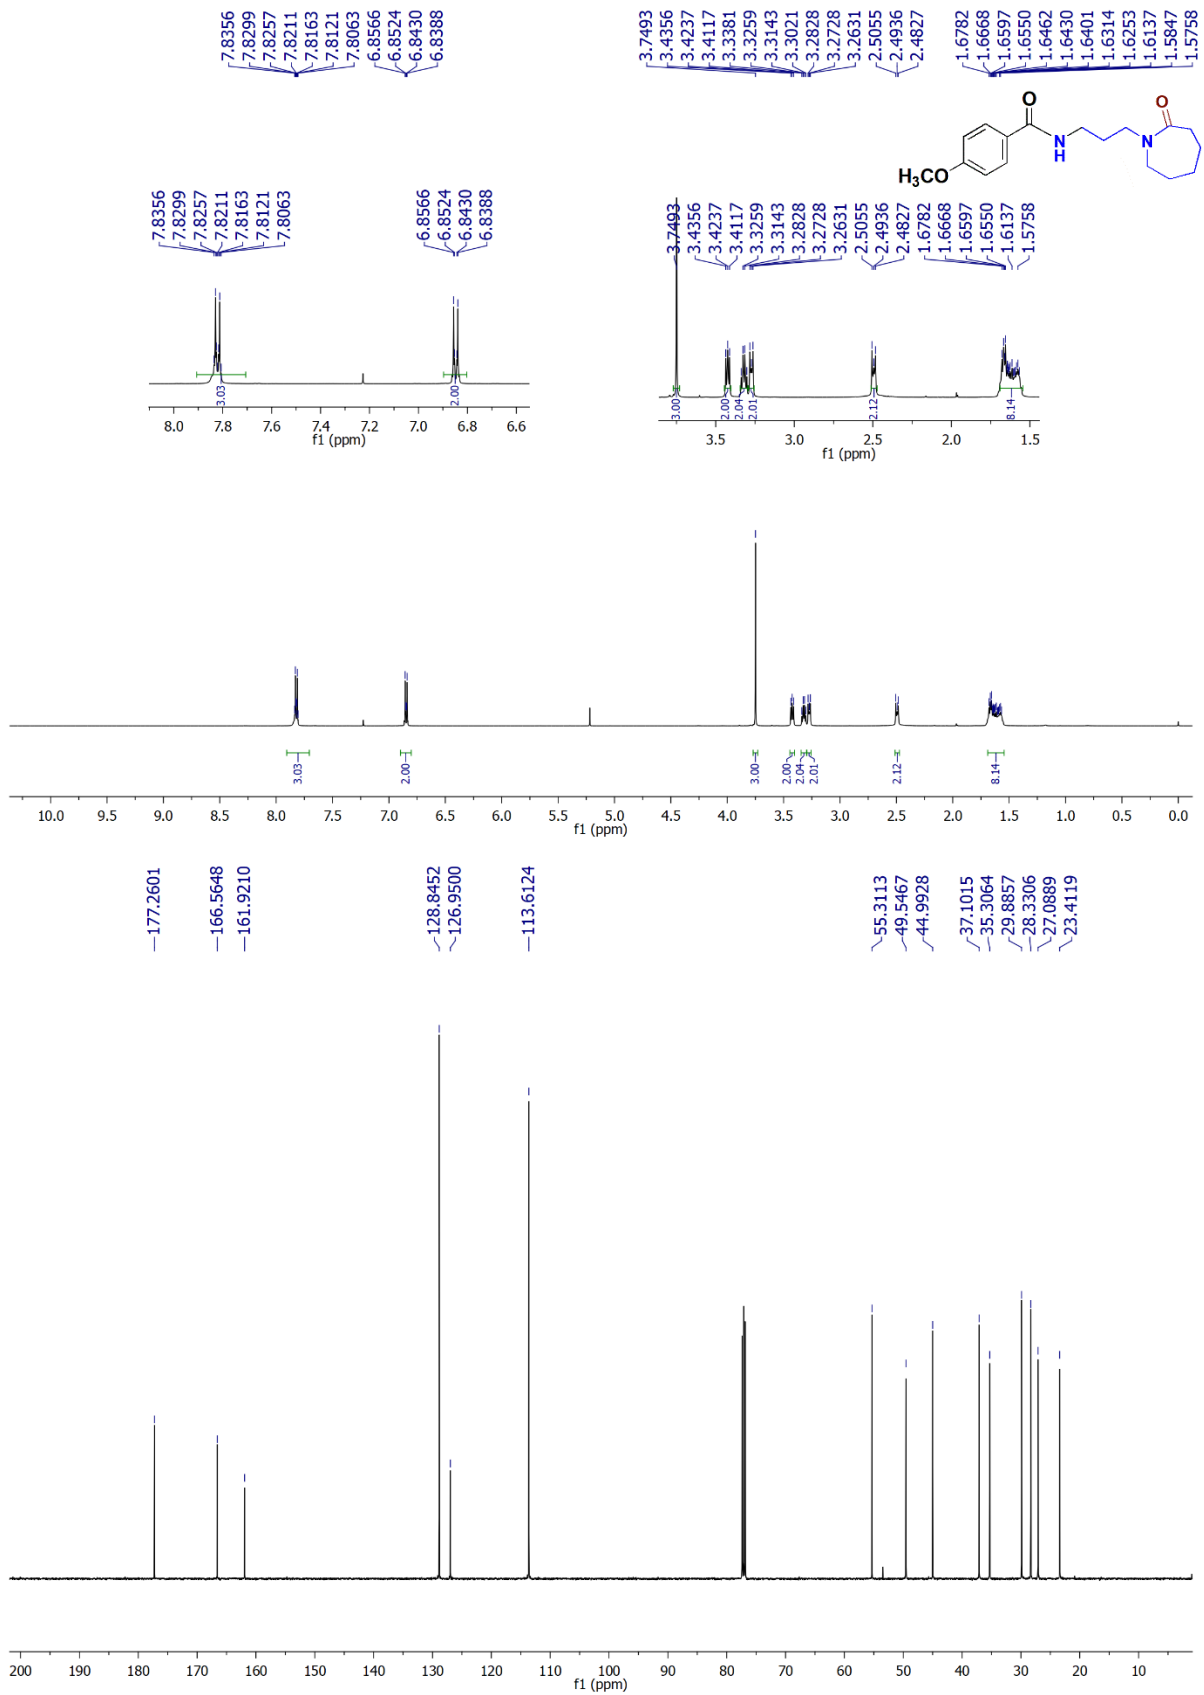

# <sup>1</sup>H and <sup>13</sup>C NMR for 17c

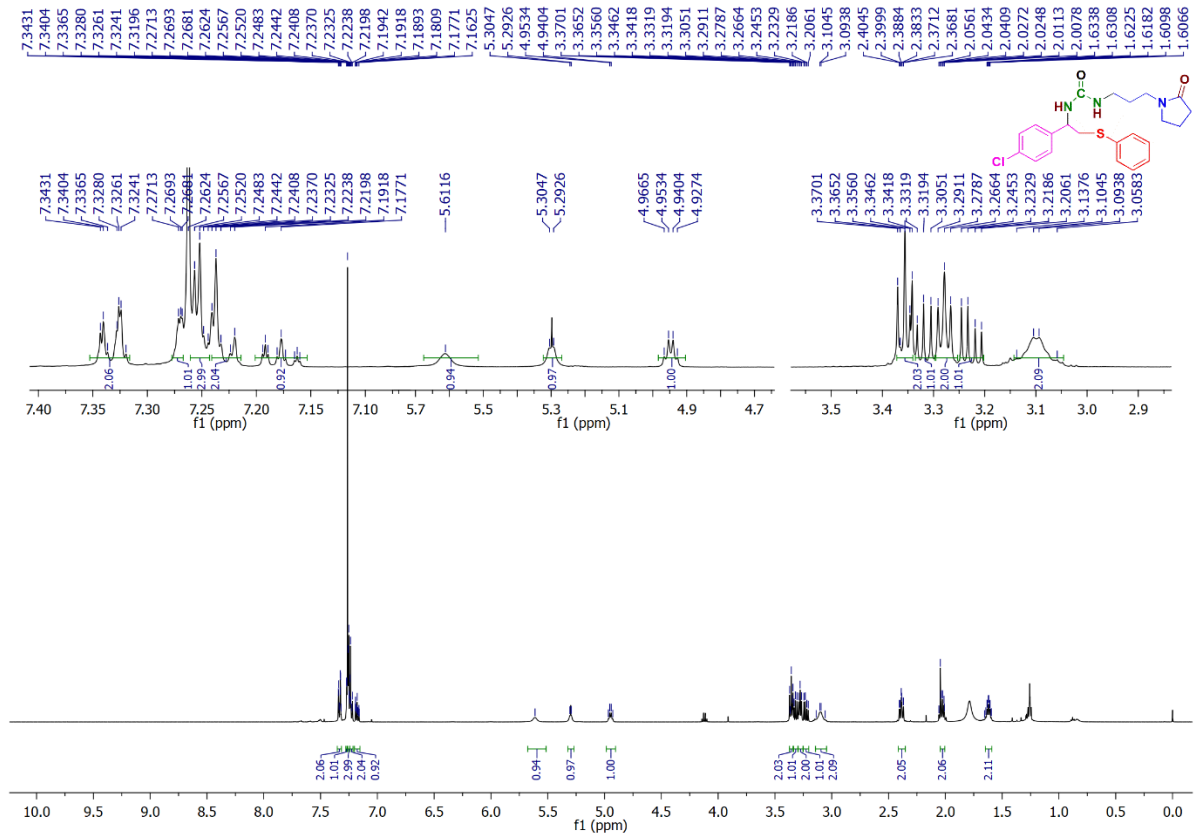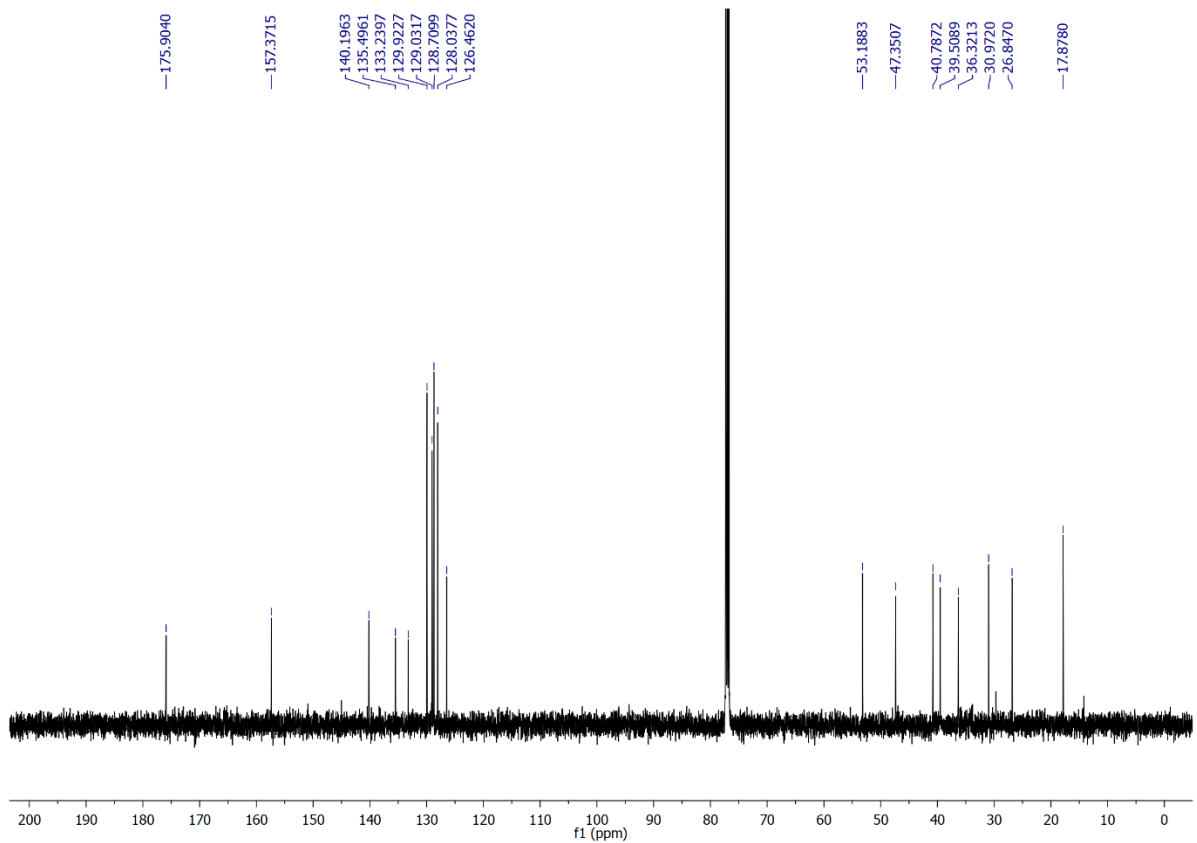

# <sup>1</sup>H and <sup>13</sup>C NMR for 17d

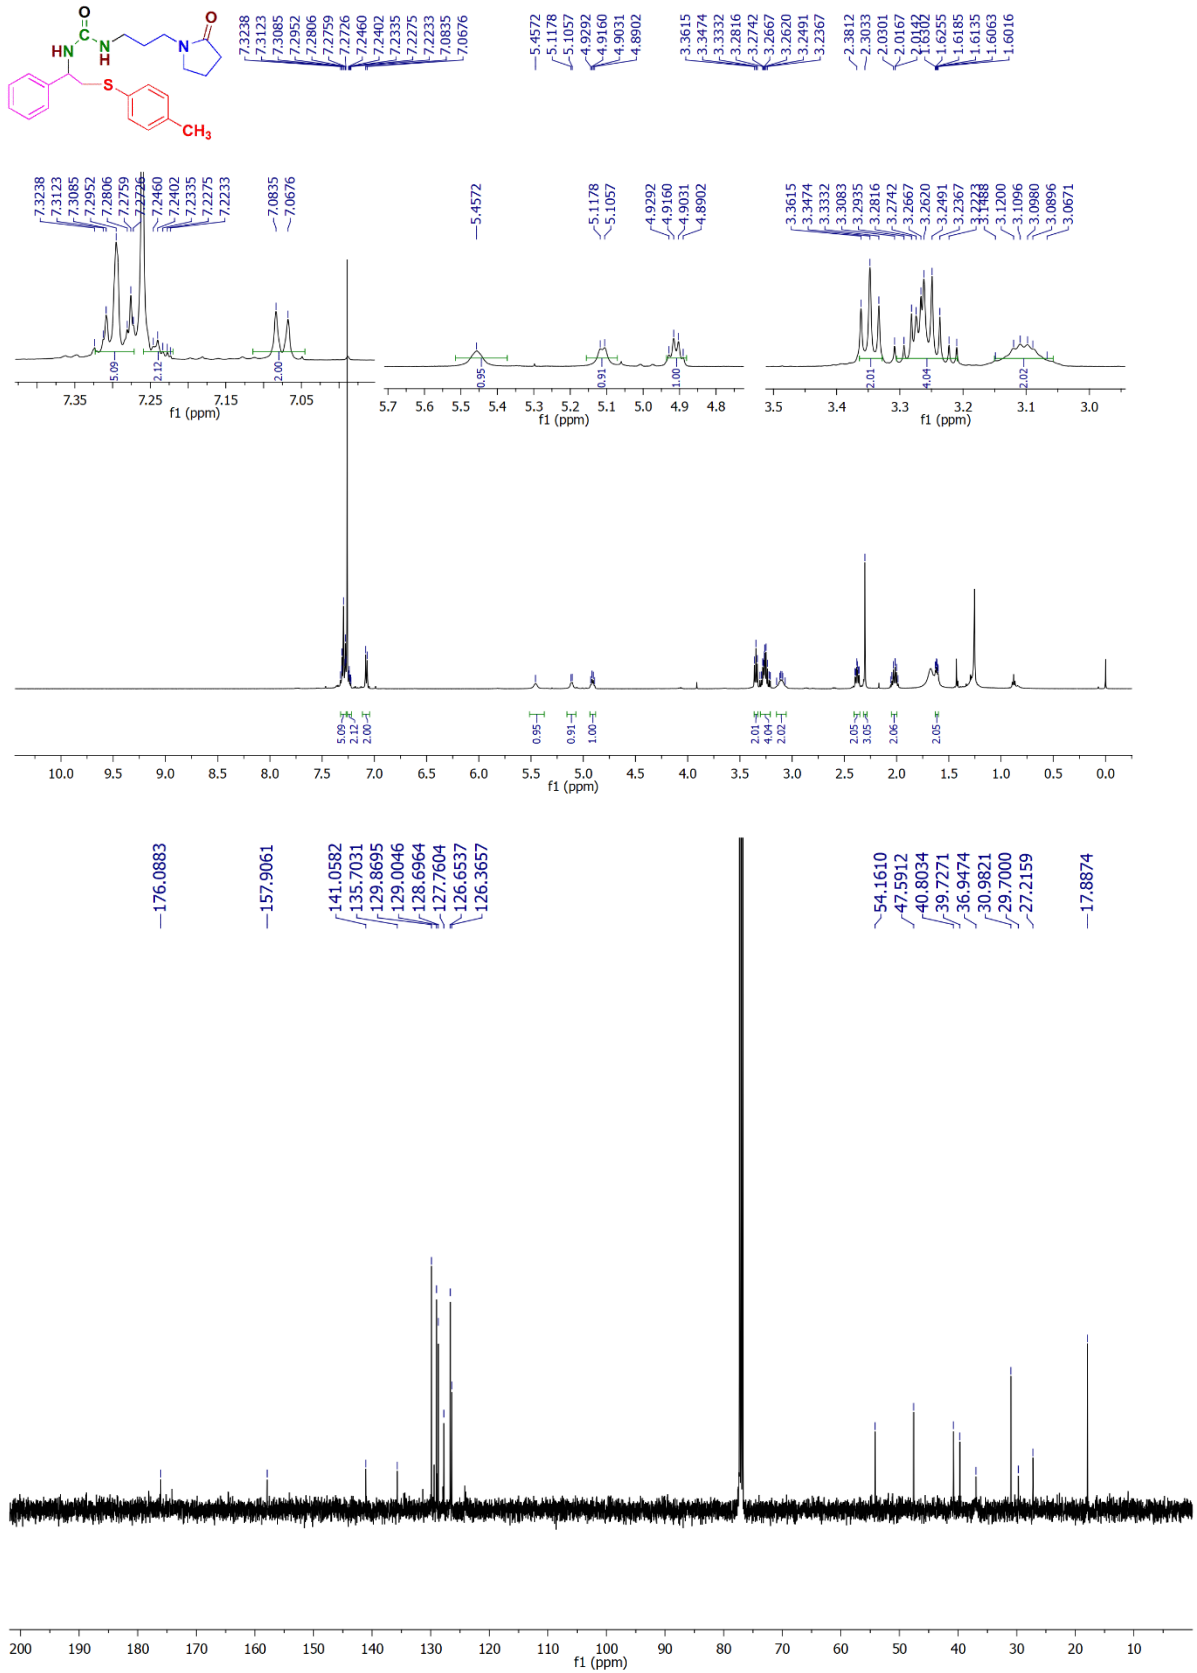

# <sup>1</sup>H and <sup>13</sup>C NMR for 17i

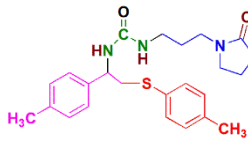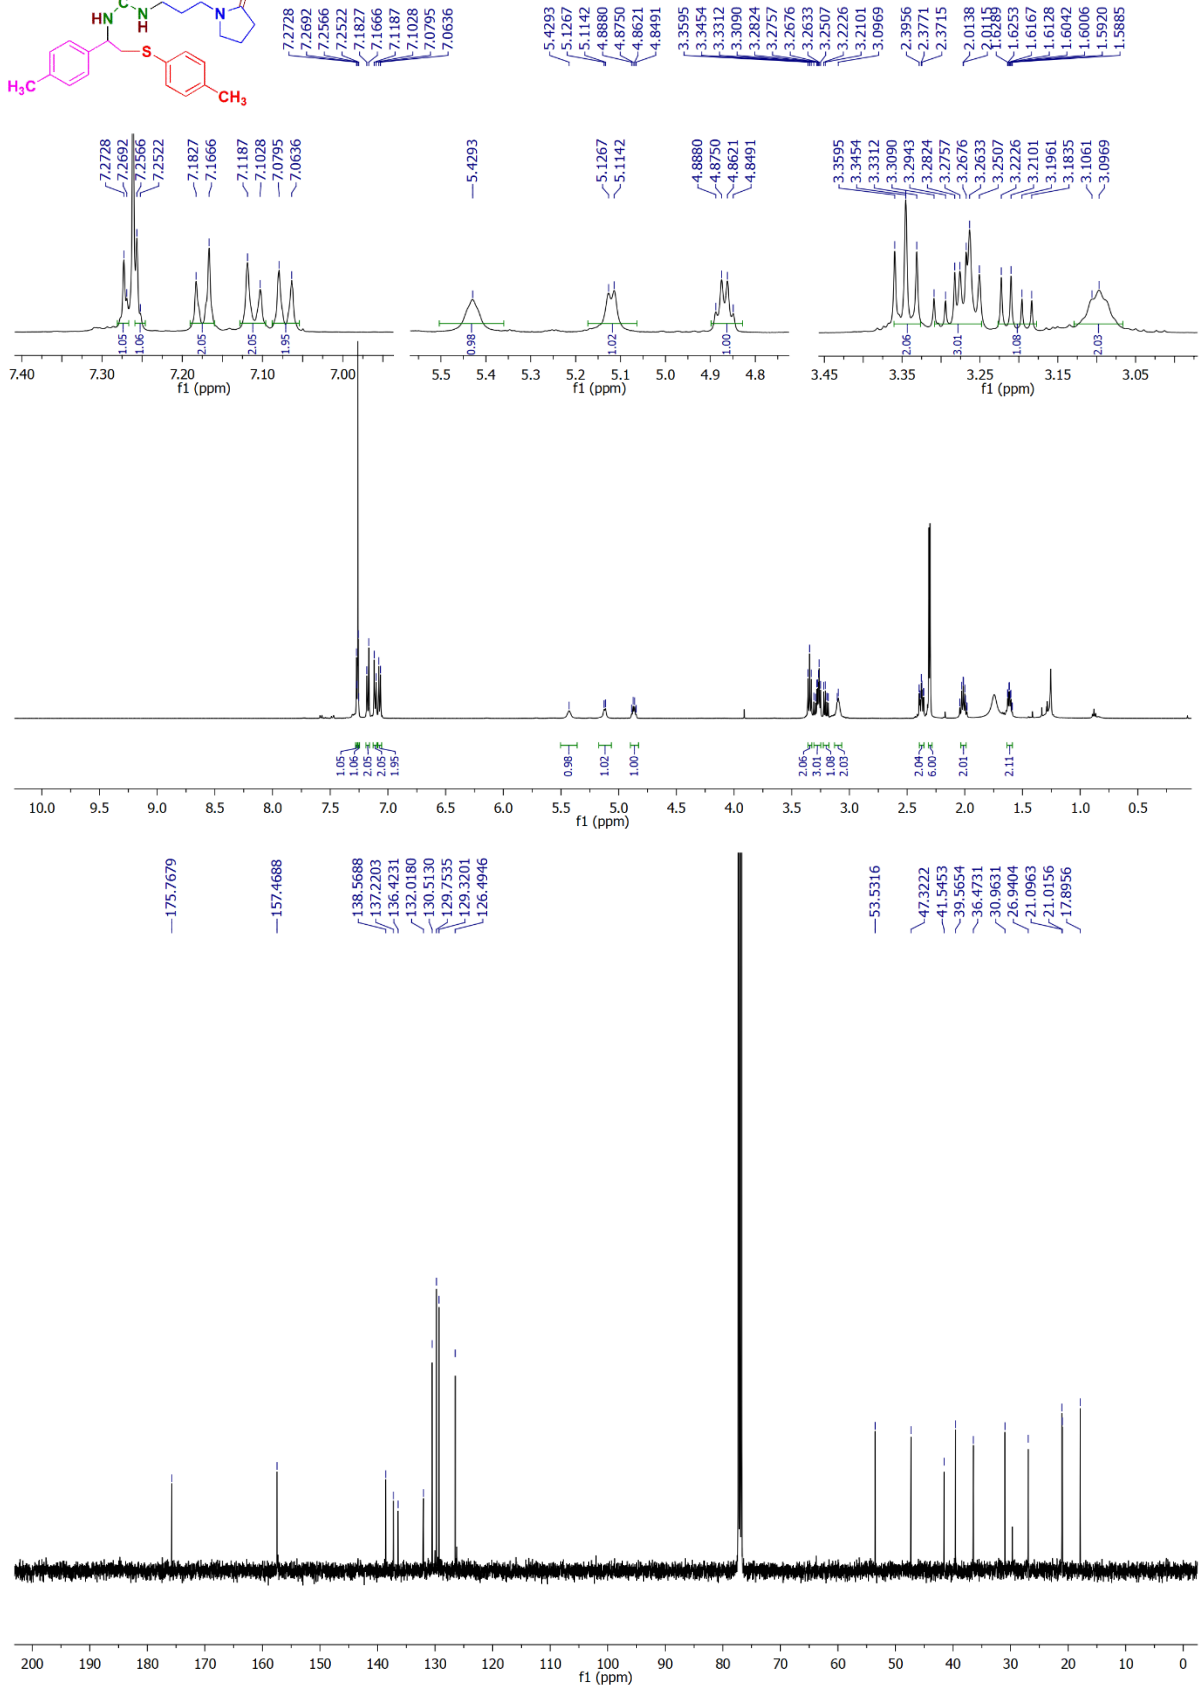

# <sup>1</sup>H and <sup>13</sup>C NMR for 18c

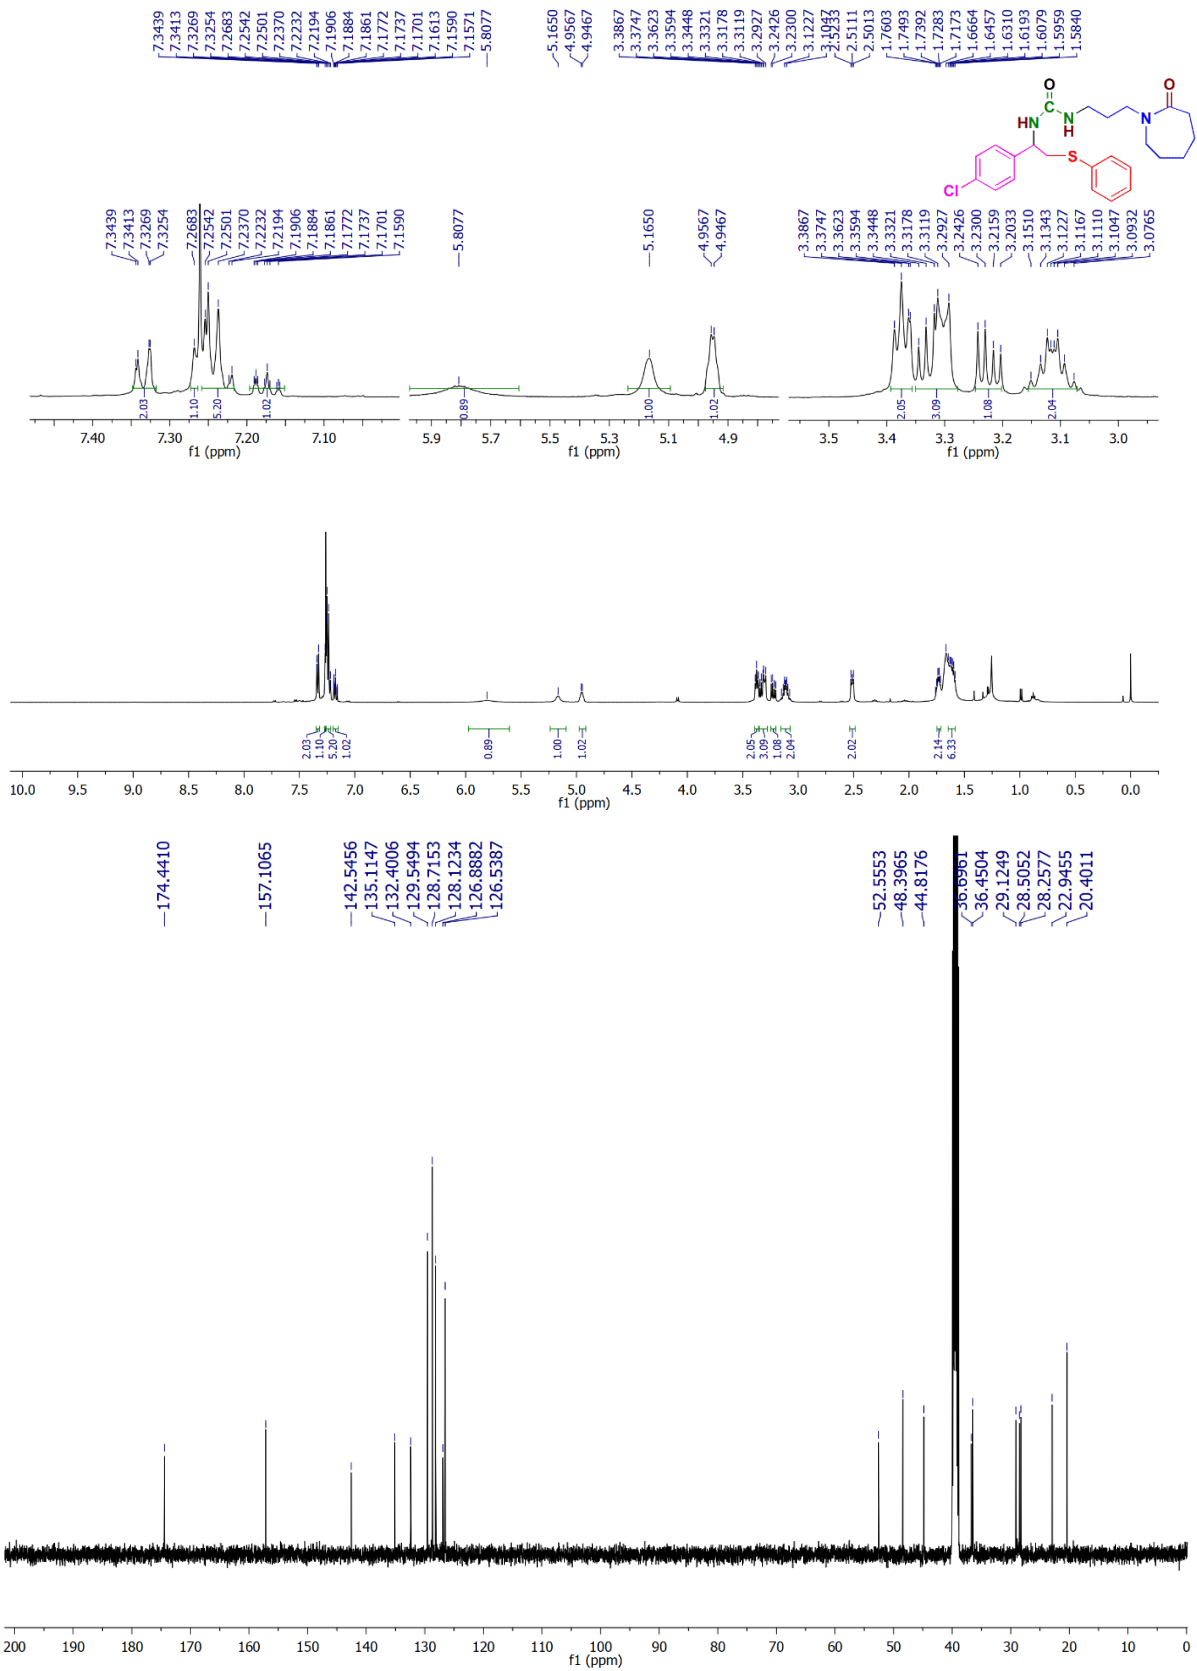

# <sup>1</sup>H and <sup>13</sup>C NMR for 18d

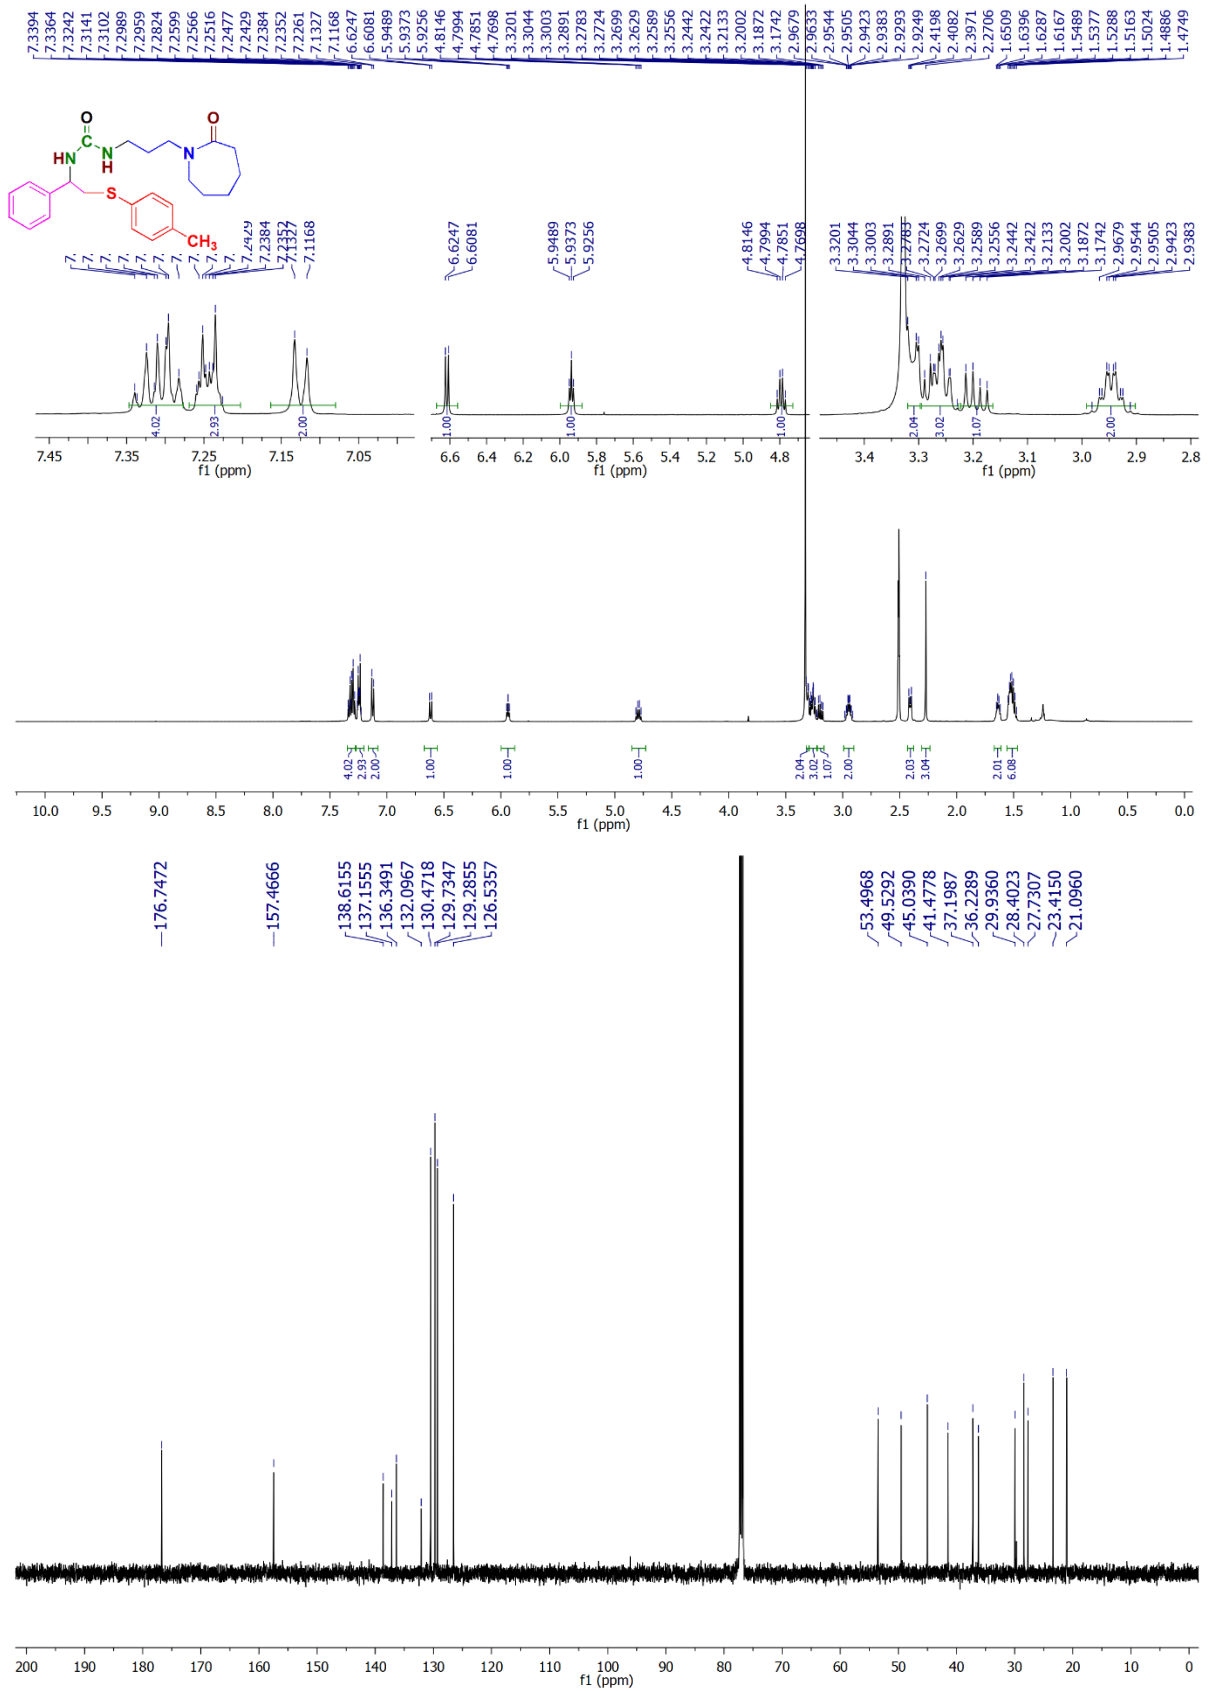



# <sup>1</sup>H and <sup>13</sup>C NMR for 18g

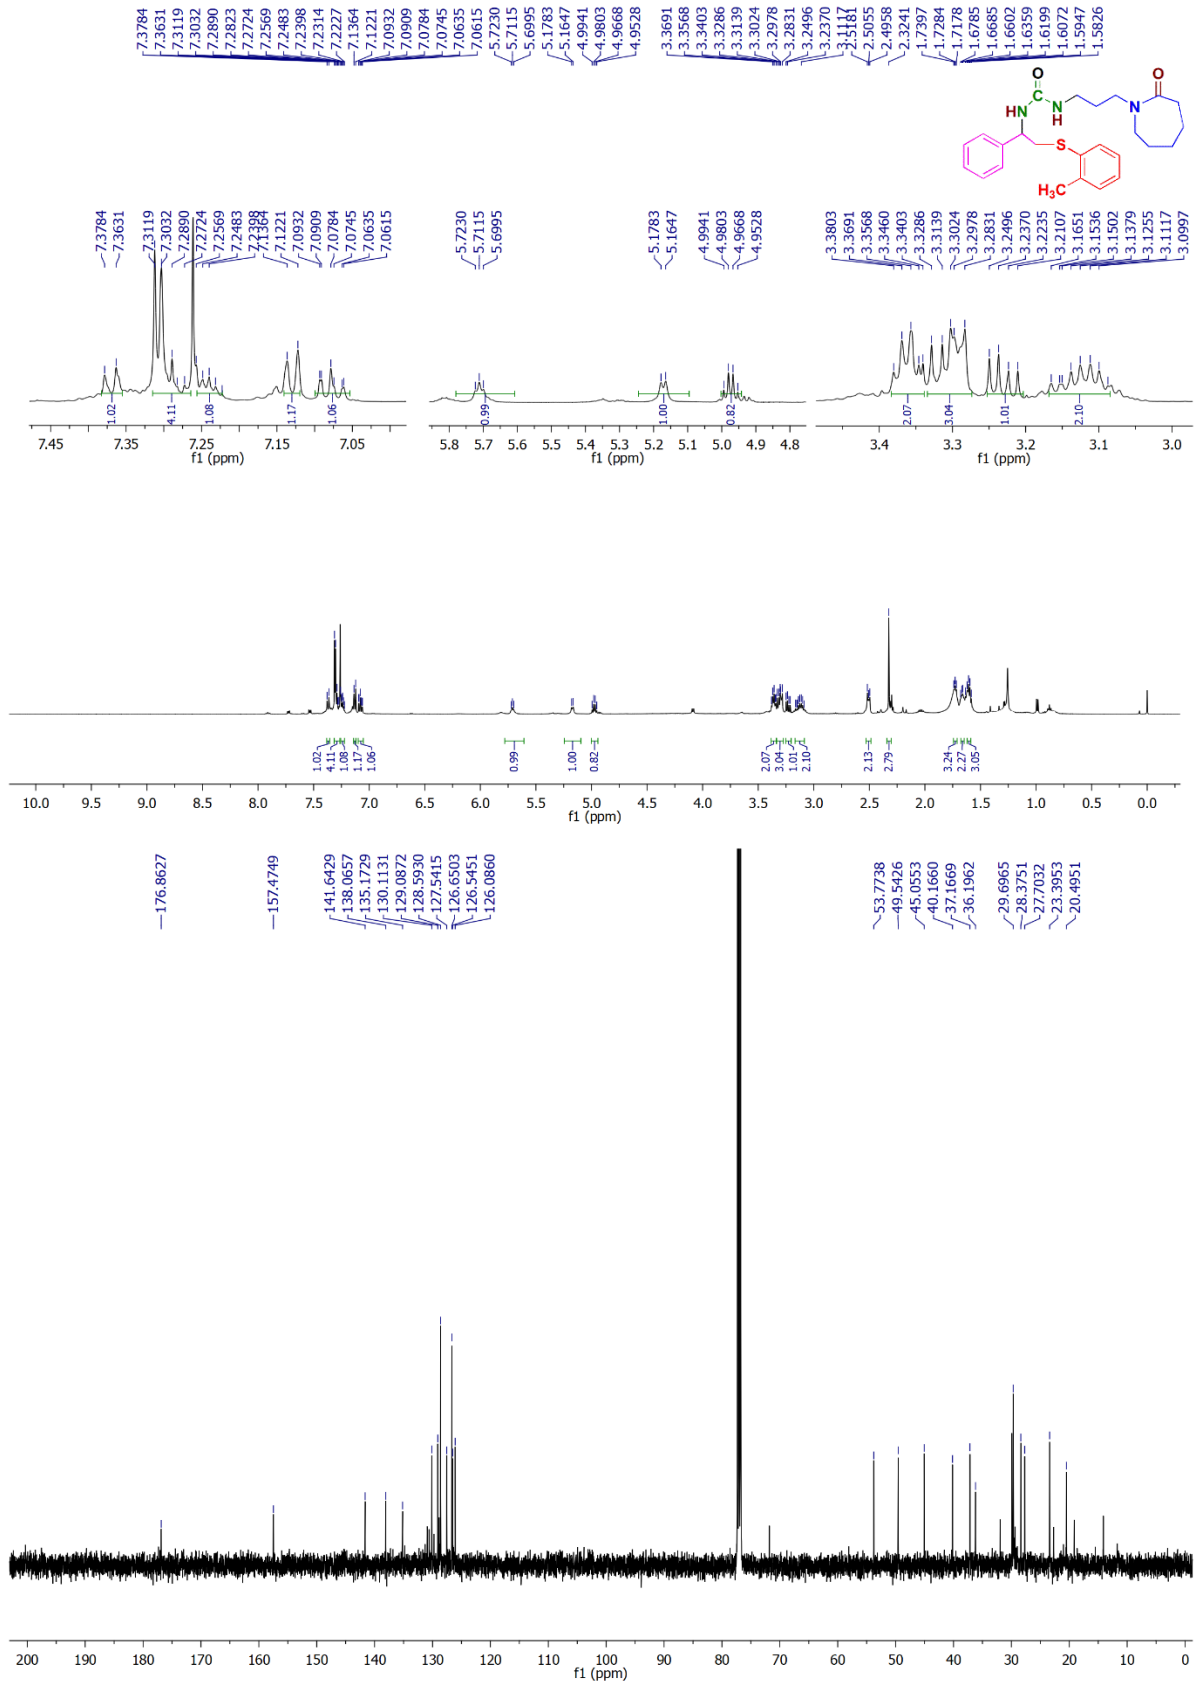

# <sup>1</sup>H and <sup>13</sup>C NMR for 19a

7.7866  
7.7827  
7.7731  
7.7691  
7.7137  
7.7093  
7.7052  
7.6957  
7.6918  
7.6873  
7.5763  
7.5632  
7.5588  
7.4888  
7.4853  
7.4813  
7.4759  
7.4739  
7.4714  
7.4679  
7.4614  
7.4576  
7.4540  
7.4373  
7.4343  
7.4295  
7.4200  
7.4177  
7.4066  
7.4025  
7.4025  
7.3715  
7.3696  
7.3676  
7.3643  
7.3597  
7.3548  
7.3527  
7.3508  
7.3479  
7.3479  
7.3472  
7.3425  
7.3337  
7.3306  
7.3209  
7.3174

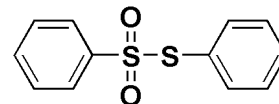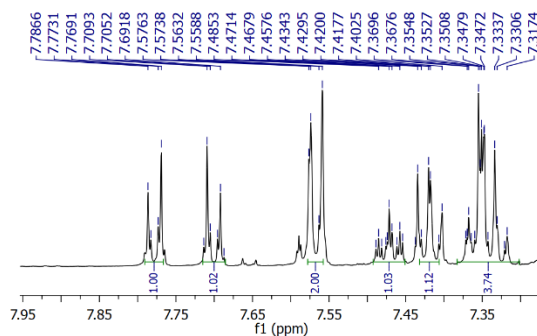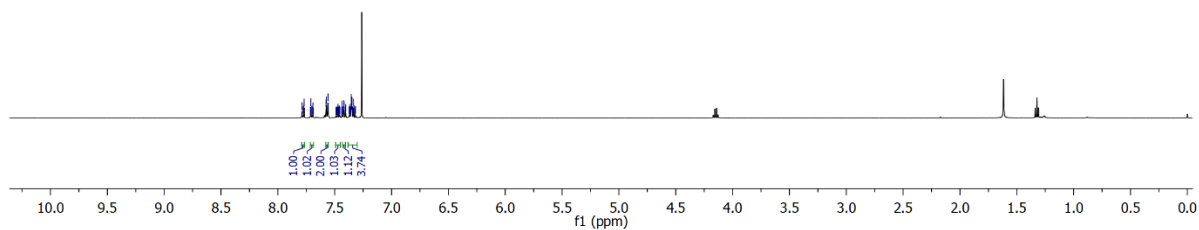

136.6095  
133.6168  
132.5751  
131.4064  
129.4383  
129.3216  
128.7988  
127.5785

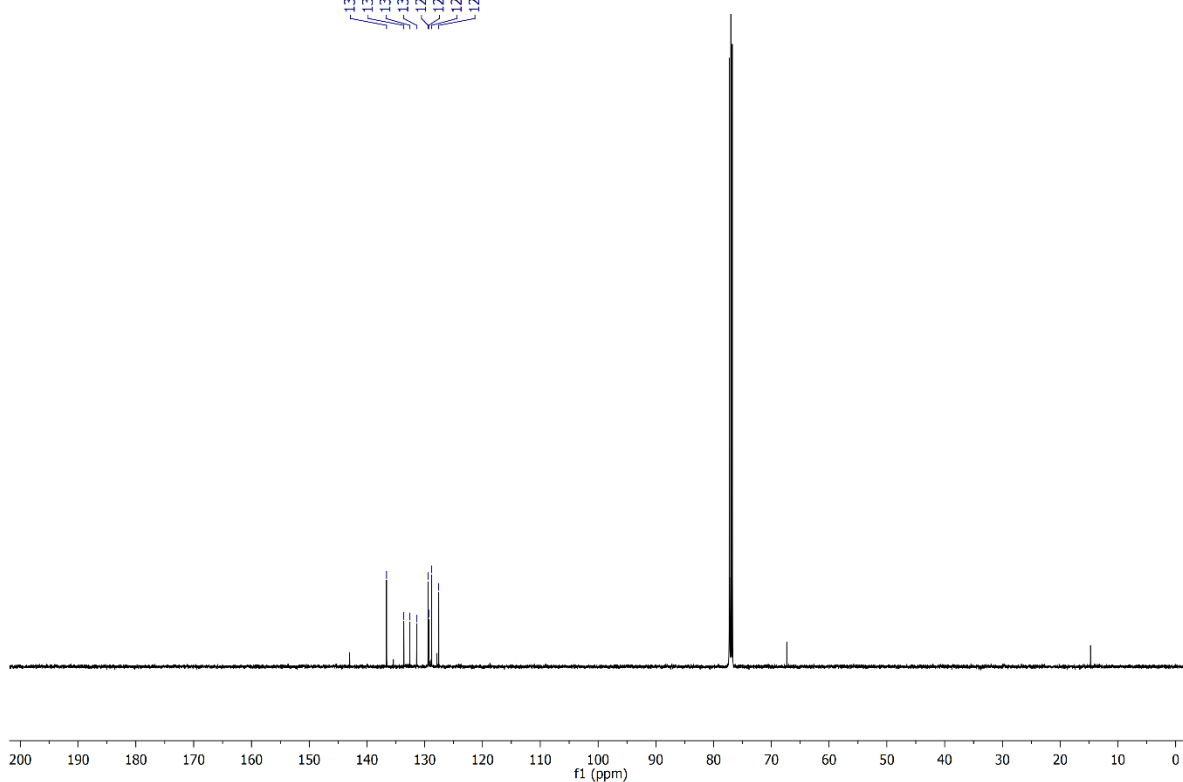

# <sup>1</sup>H and <sup>13</sup>C NMR for 19b

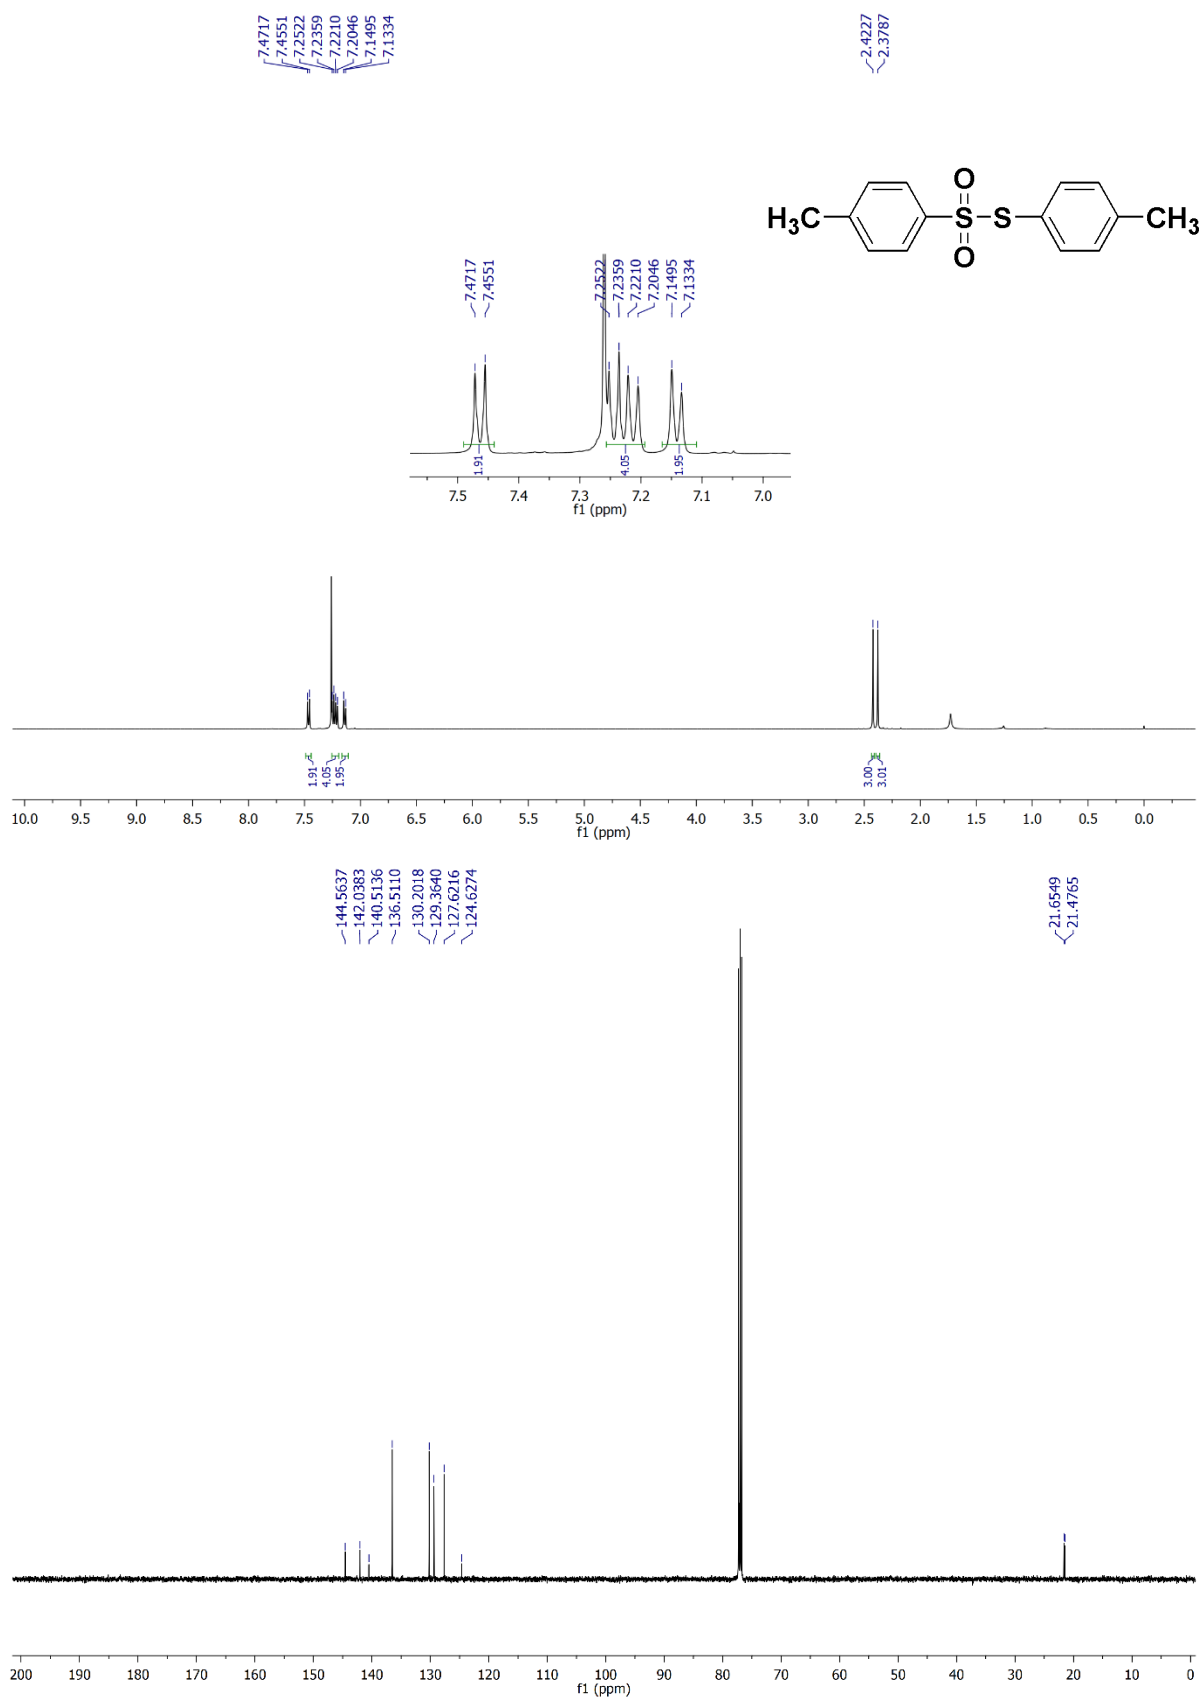

# <sup>1</sup>H and <sup>13</sup>C NMR for 19c

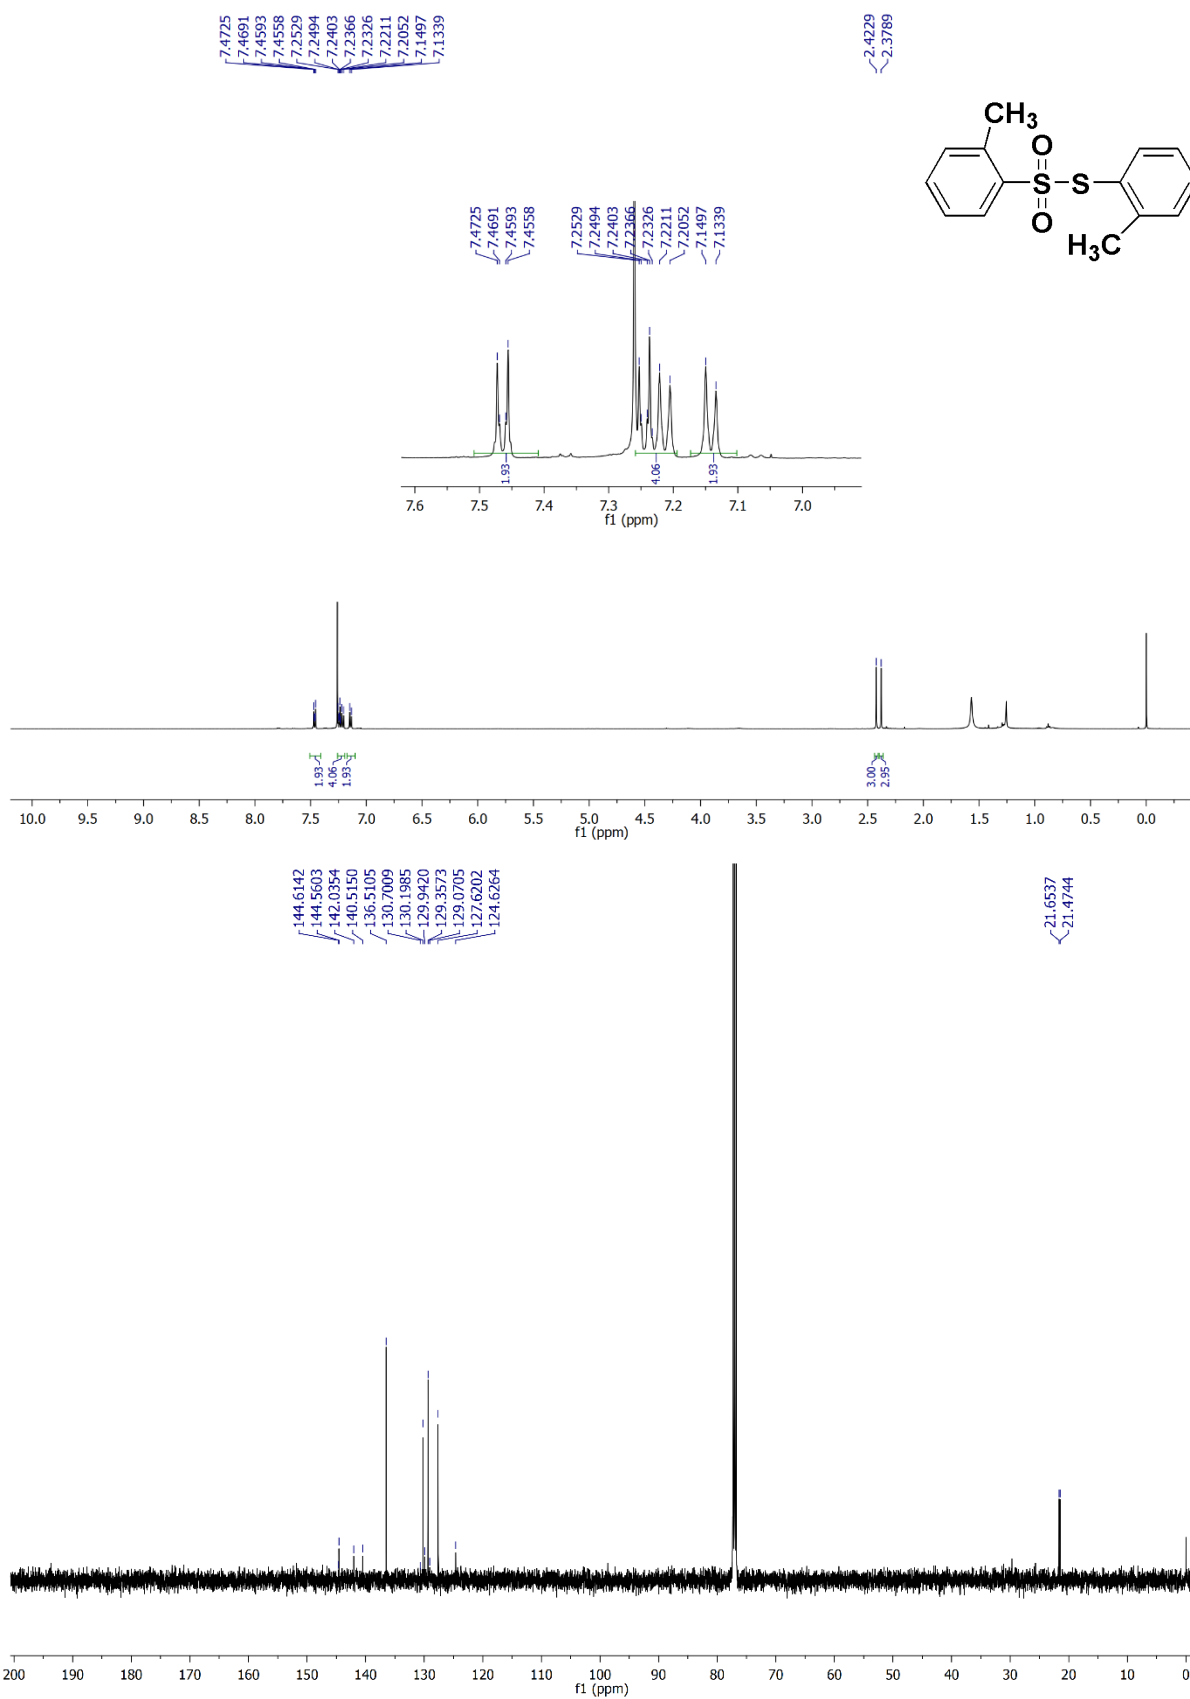

# <sup>1</sup>H and <sup>13</sup>C NMR for 19d

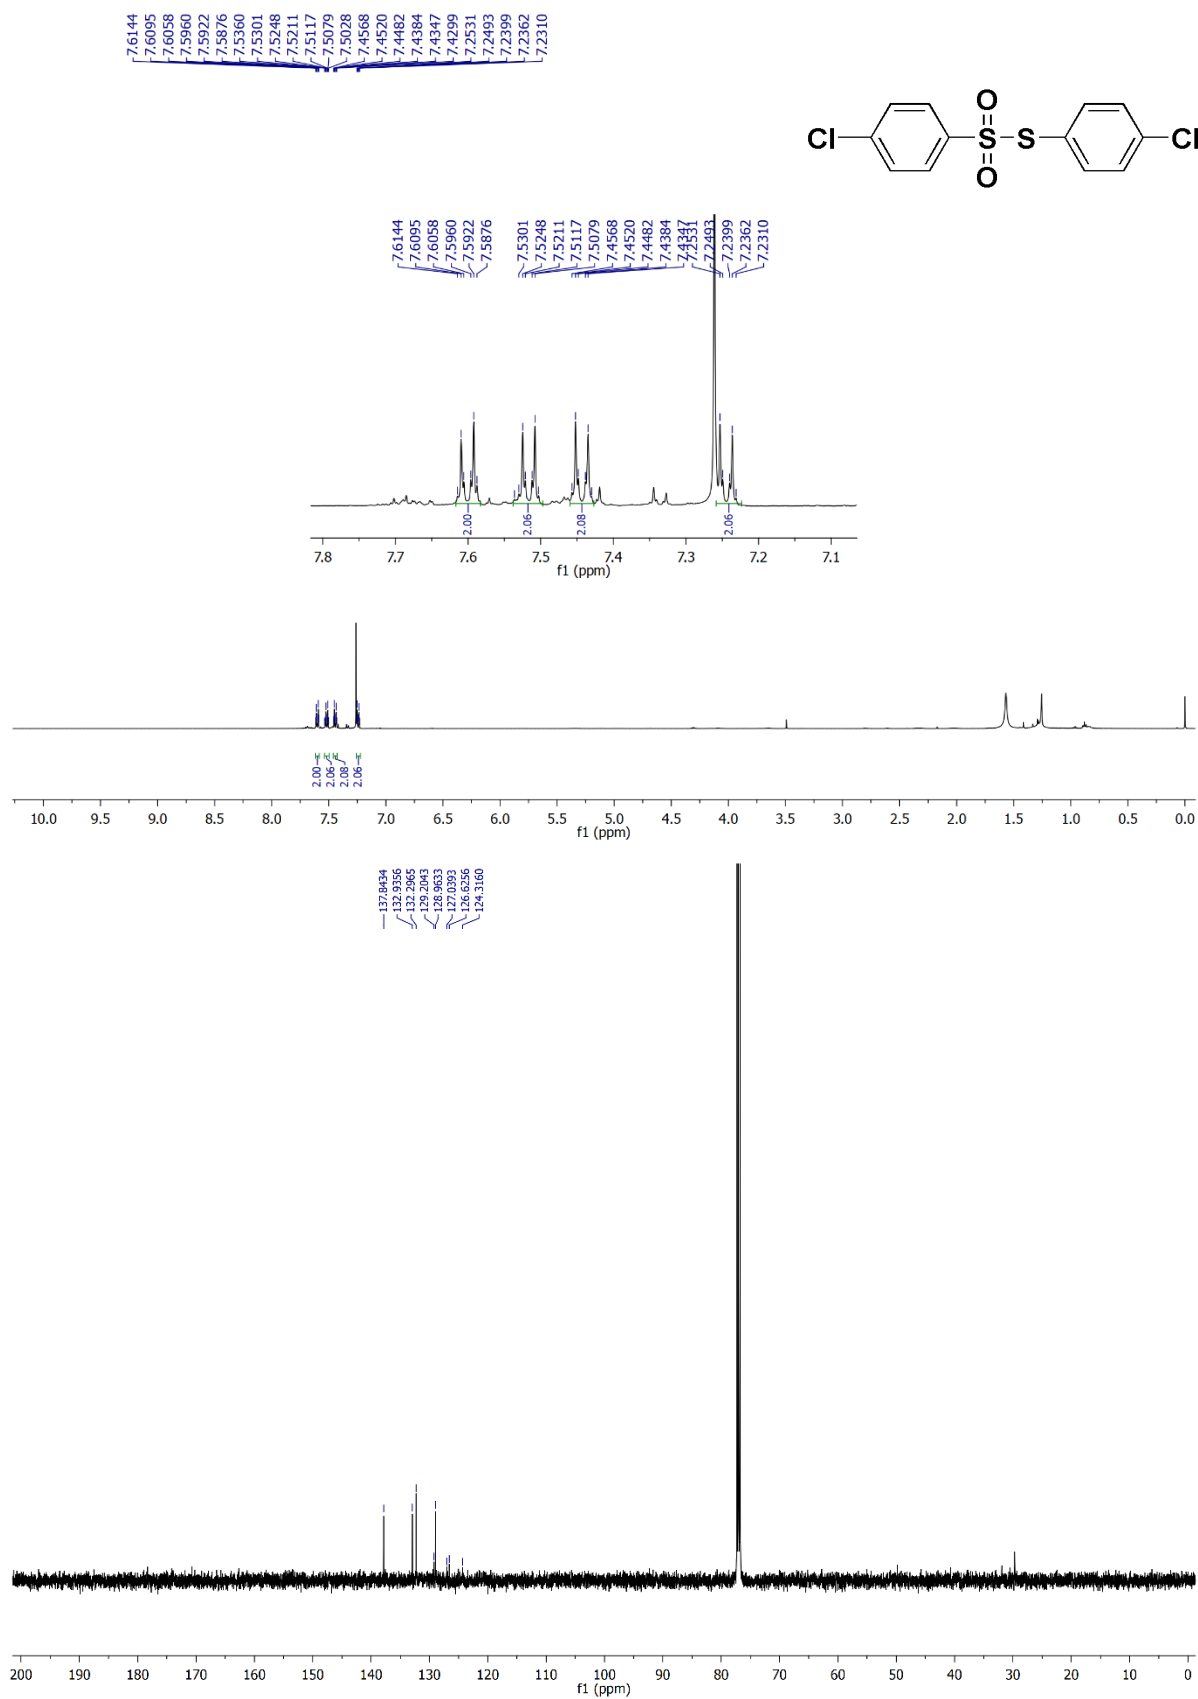

# <sup>1</sup>H and <sup>13</sup>C NMR for 19e

7.5917  
7.5894  
7.5870  
7.5758  
7.5736  
7.5629  
7.5587  
7.4887  
7.4852  
7.4812  
7.4758  
7.4737  
7.4713  
7.4678  
7.4613  
7.4575  
7.4538  
7.4341  
7.4293  
7.4198  
7.4174  
7.4063  
7.4023  
7.3711  
7.3673  
7.3638  
7.3594  
7.3546  
7.3505  
7.3474  
7.3423  
7.3334  
7.3302  
7.3172

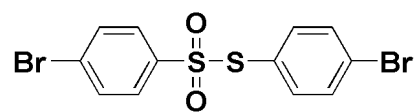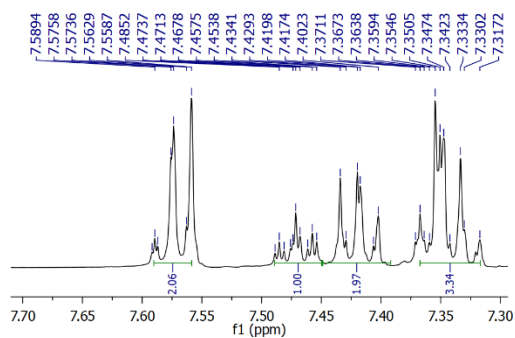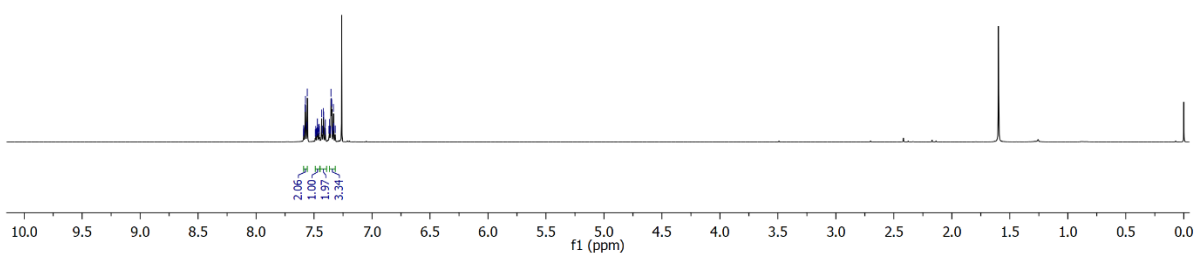

142.9995  
136.6097  
133.6178  
131.4086  
129.4590  
128.8003  
127.8742  
127.5785

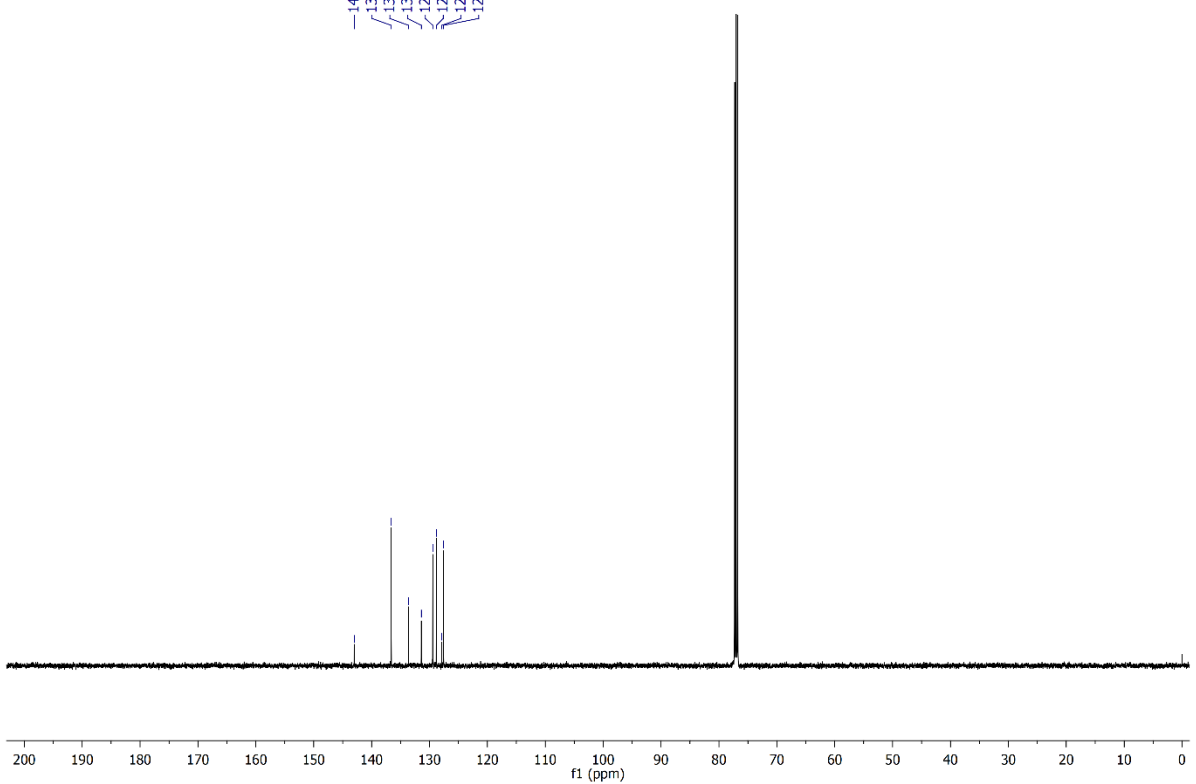

### 13. HRMS

#### HRMS 7a

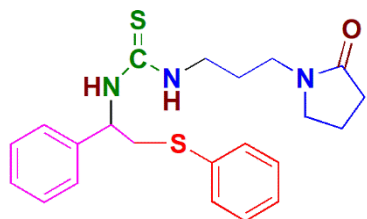

1: TOF MS ES+

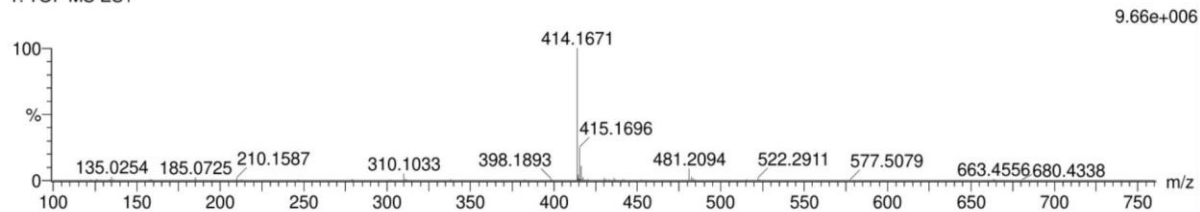

#### HRMS 7b

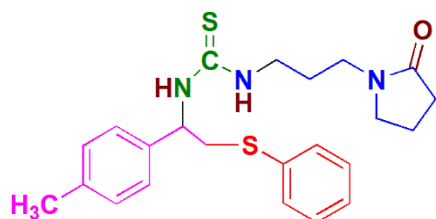

1: TOF MS ES+

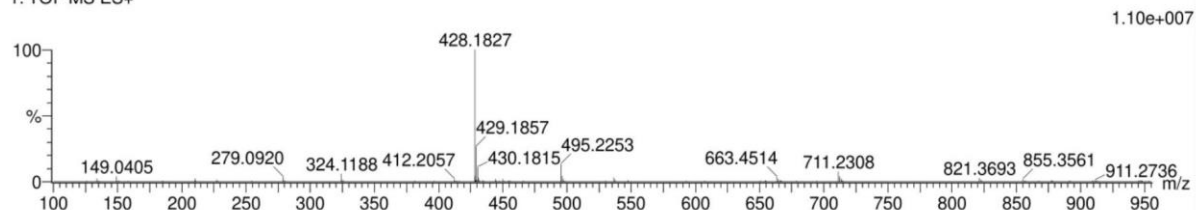

#### HRMS 7c

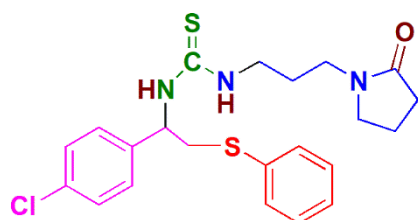

1: TOF MS ES+

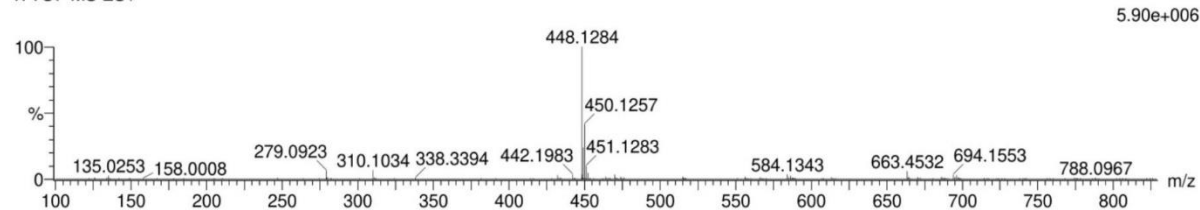

### HRMS 7d

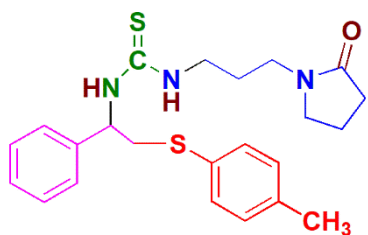

1: TOF MS ES+

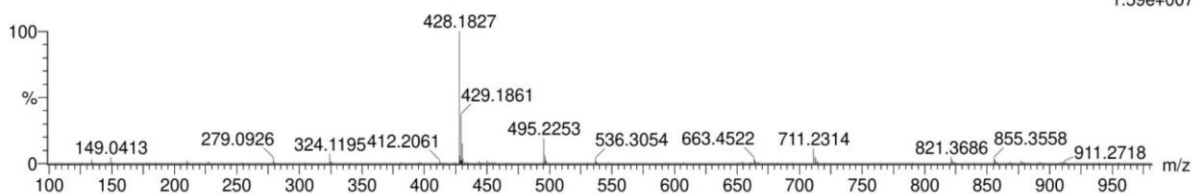

### HRMS 7e

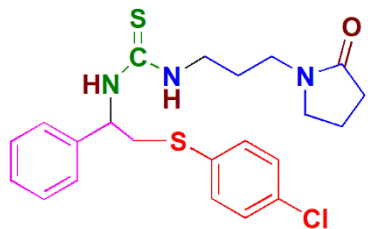

1: TOF MS ES+

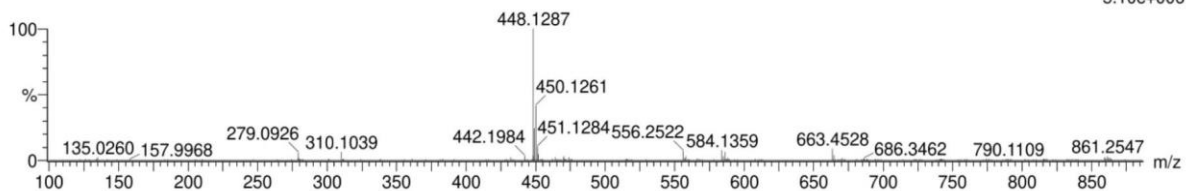

### HRMS 7f

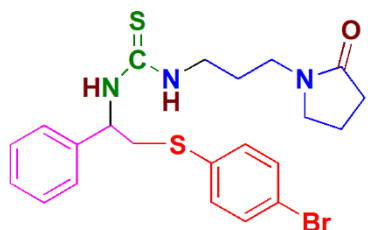

1: TOF MS ES+

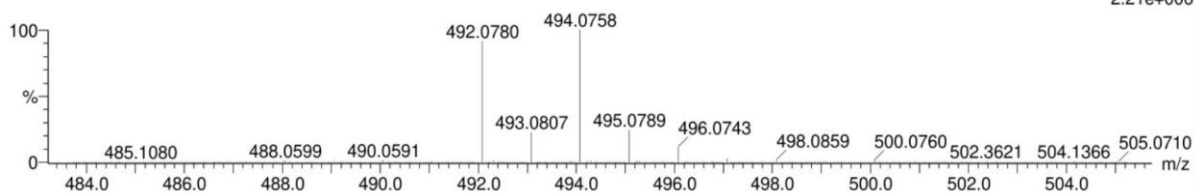



### HRMS 7g

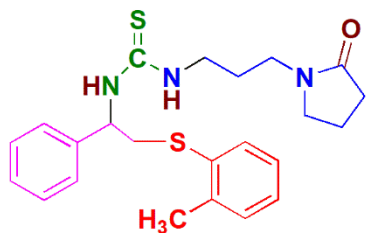

1: TOF MS ES+

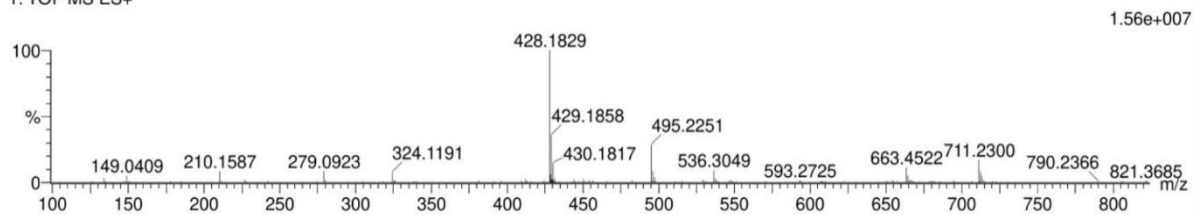

### HRMS 7h

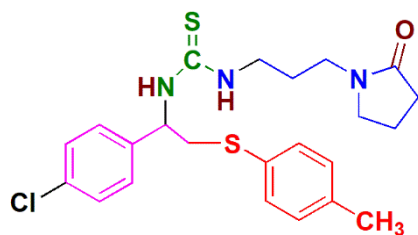

1: TOF MS ES+

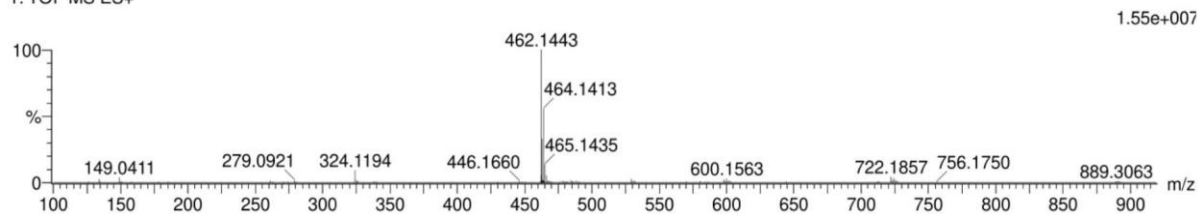

### HRMS 7i

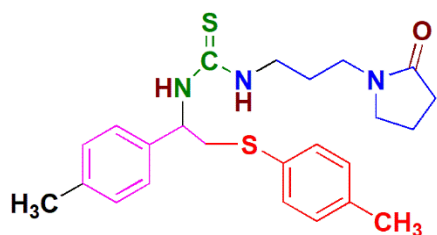

1: TOF MS ES+

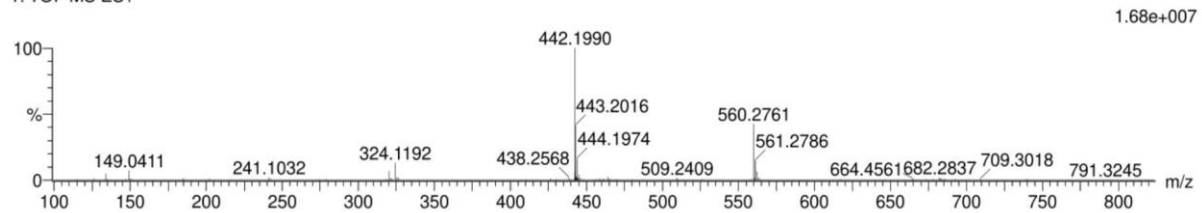

### HRMS 7j

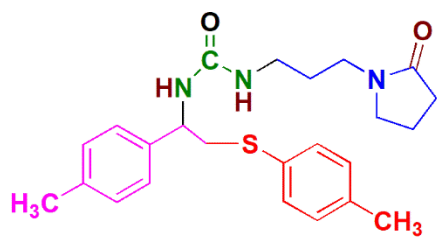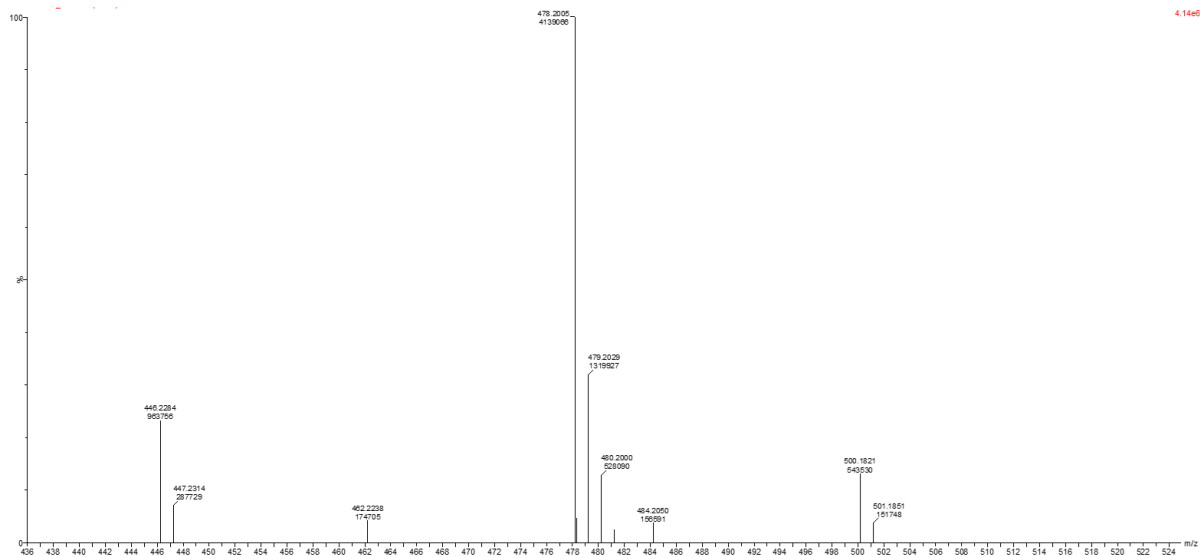

### HRMS 8a

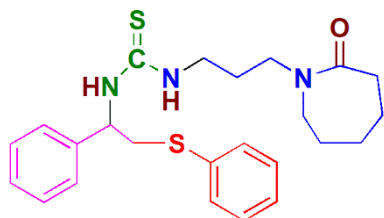

1: TOF MS ES+

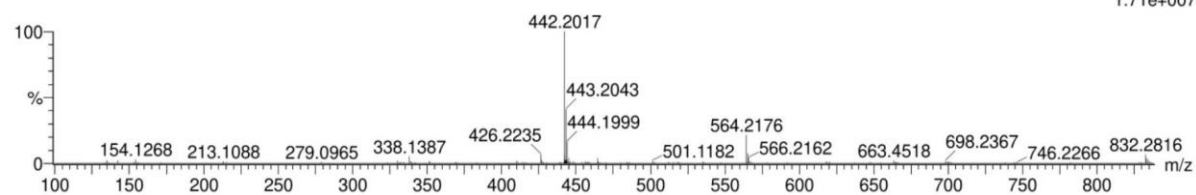

### HRMS 8b

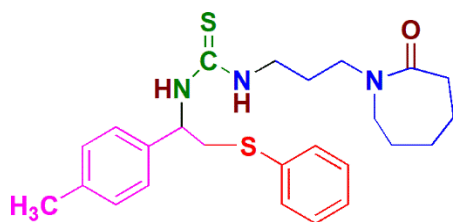

1: TOF MS ES+

2.05e+006

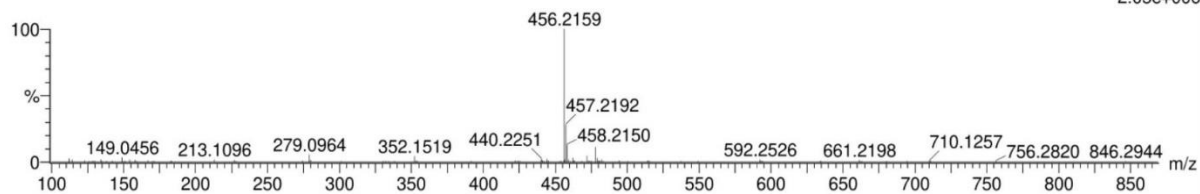

### HRMS 8c

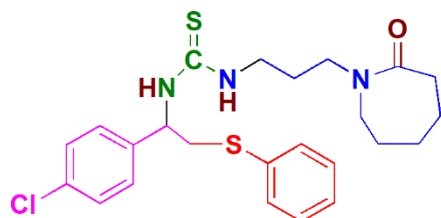

1: TOF MS ES+

6.89e+006

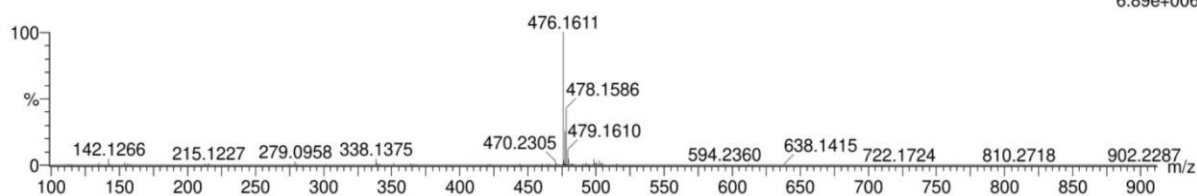

### HRMS 8d

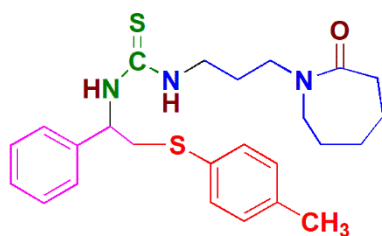

1: TOF MS ES+

1.68e+007

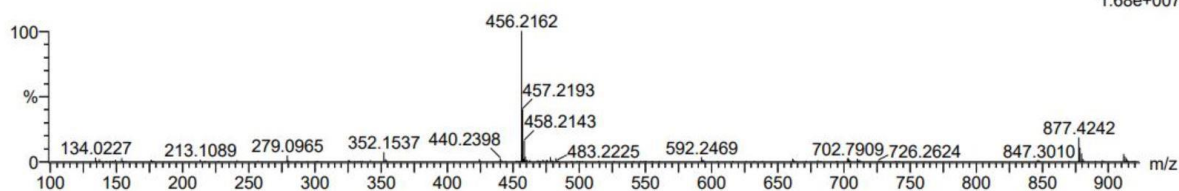

### HRMS 8e

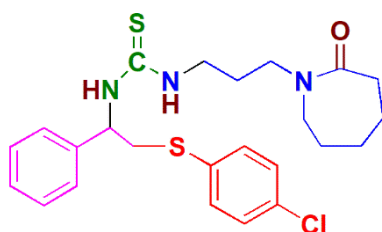

1: TOF MS ES+

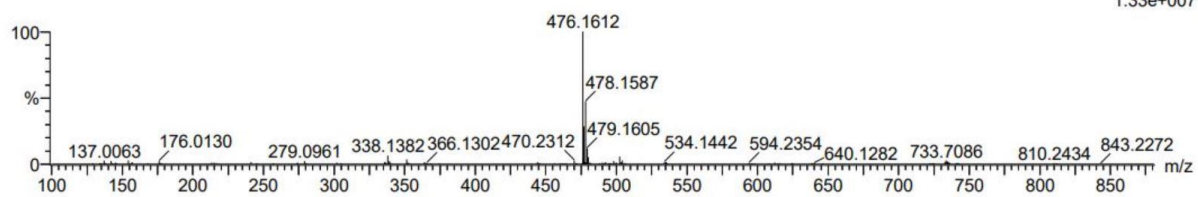

### HRMS 8f

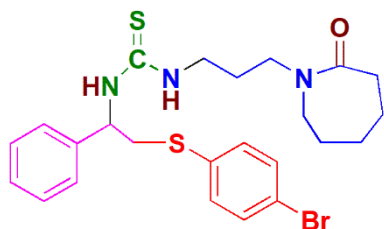

SAIF PANJAB UNIVERSITY, CHANDIGARH

SYNAPT-XS#DBA064

16-Feb-2023  
15:19:33  
1: TOF MS ES+  
1.89e6

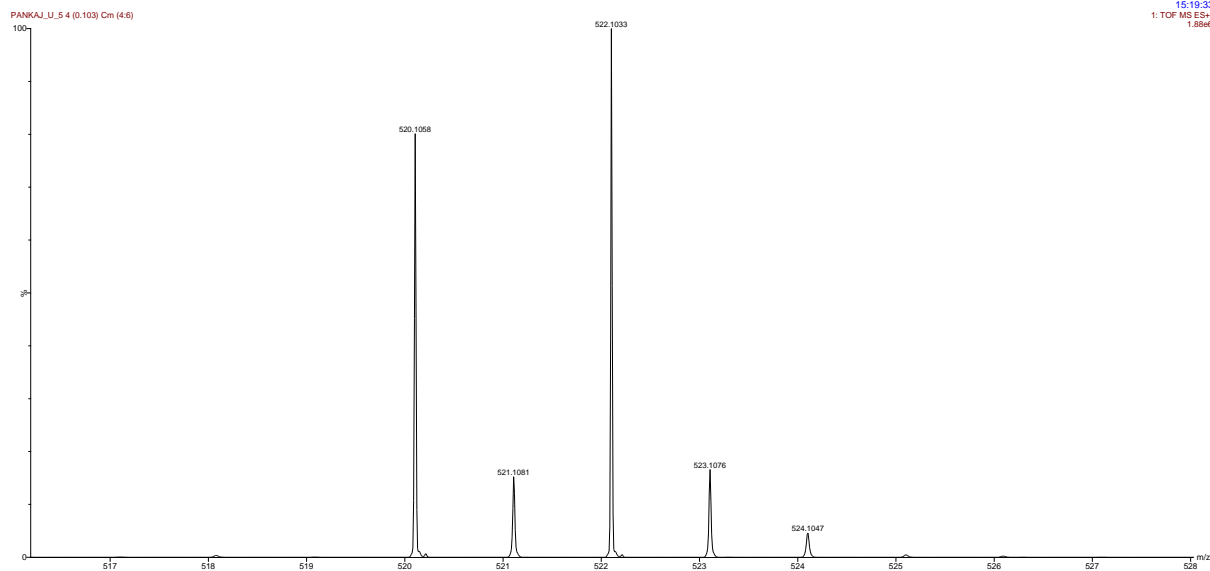

### HRMS 8g

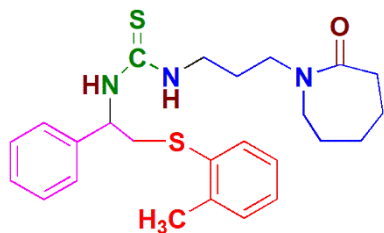

1: TOF MS ES+

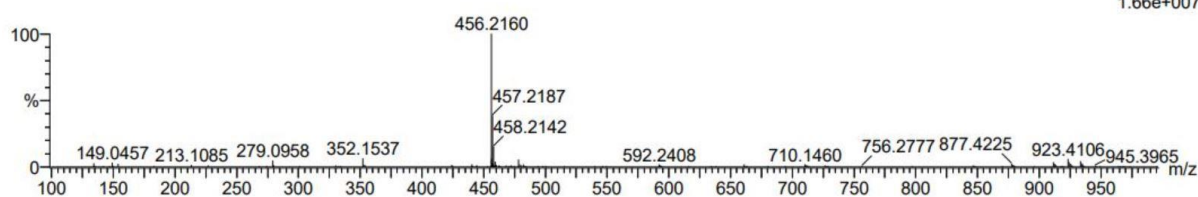

### HRMS 8h

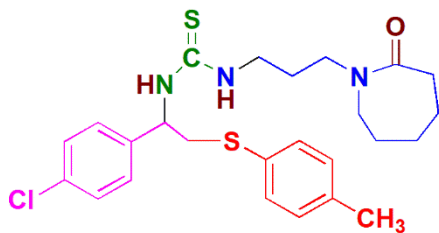

1: TOF MS ES+

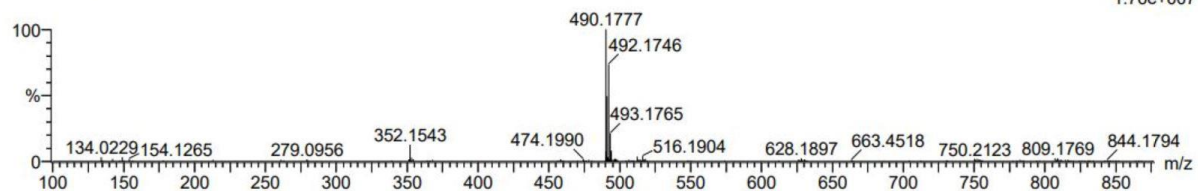

### HRMS 8i

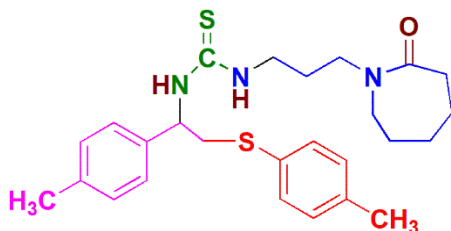

1: TOF MS ES+

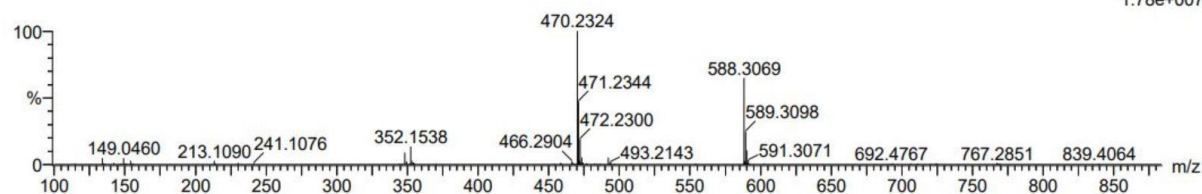

### HRMS 10a

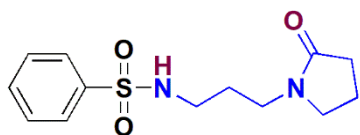

1: TOF MS ES+

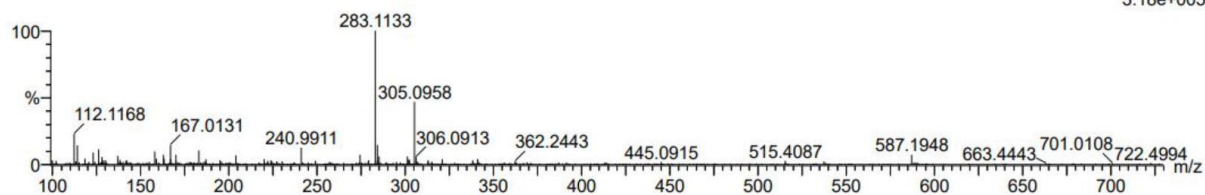

### HRMS 10b

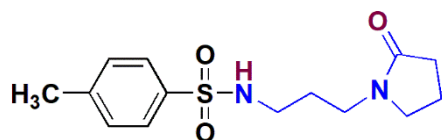

1: TOF MS ES+

1.30e+005

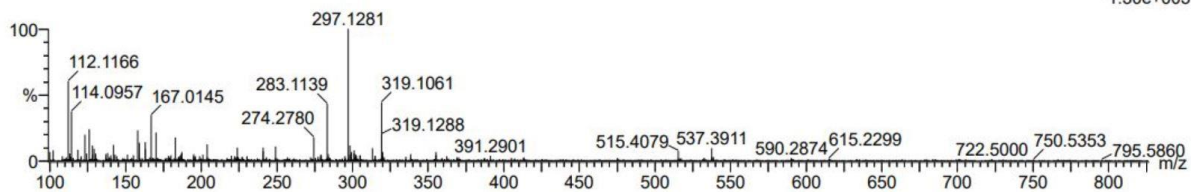

### HRMS 10c

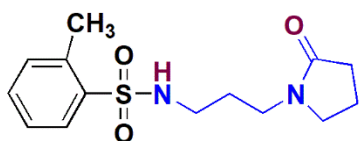

1: TOF MS ES+

1.52e+005

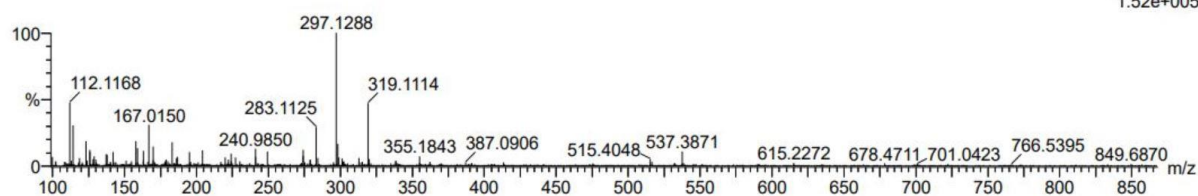

### HRMS 10d

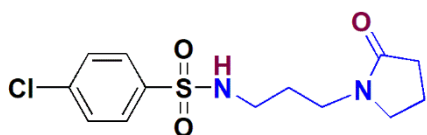

1: TOF MS ES+

2.15e+005

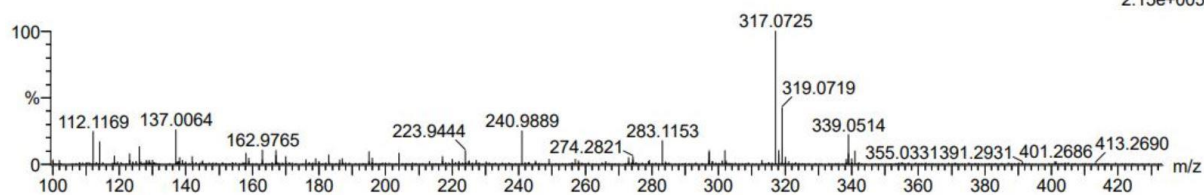

### HRMS 10e

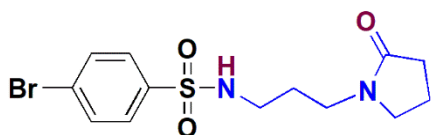

1: TOF MS ES+

3.50e+005

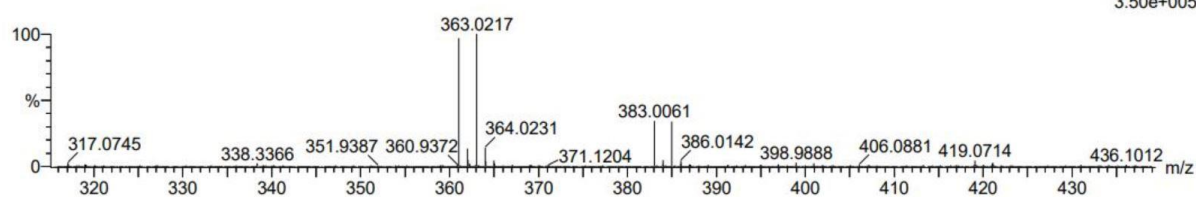

### HRMS 11a

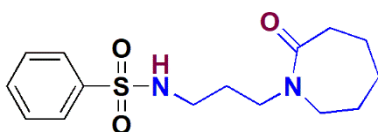

1: TOF MS ES+

1.06e+005

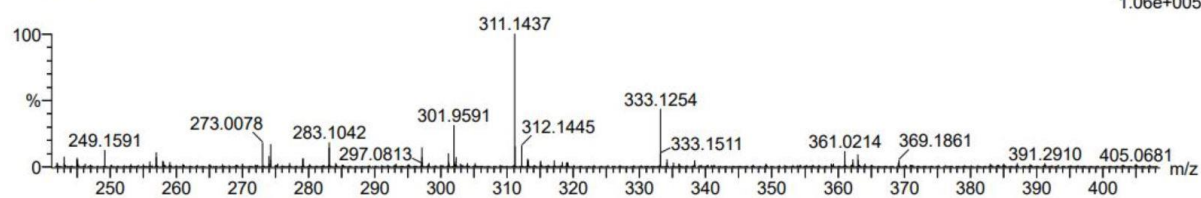

### HRMS 11b

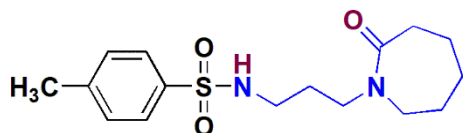

1: TOF MS ES+

7.15e+005

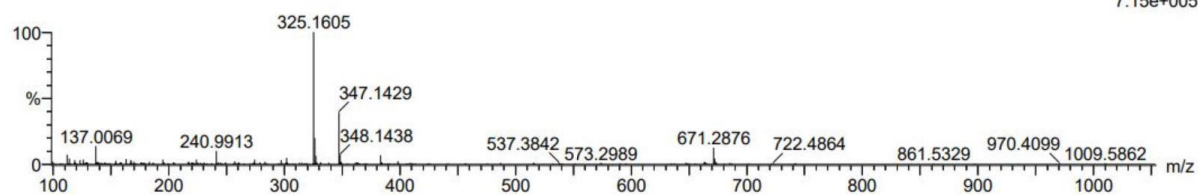

### HRMS 11c

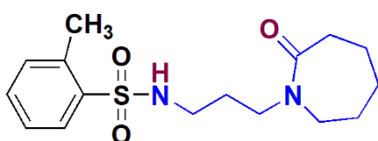

1: TOF MS ES+

4.52e+005

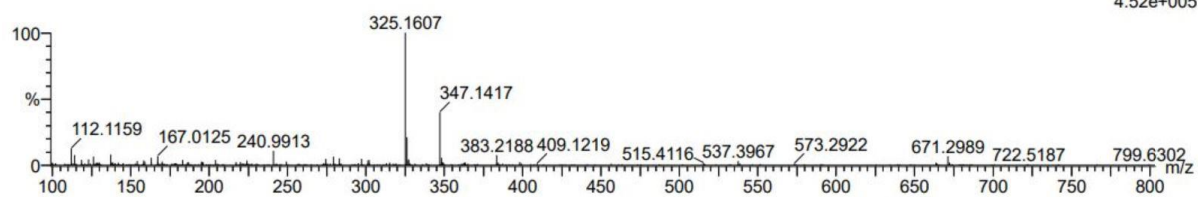

### HRMS 11d

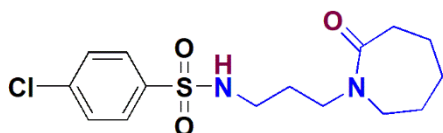

1: TOF MS ES+

4.33e+005

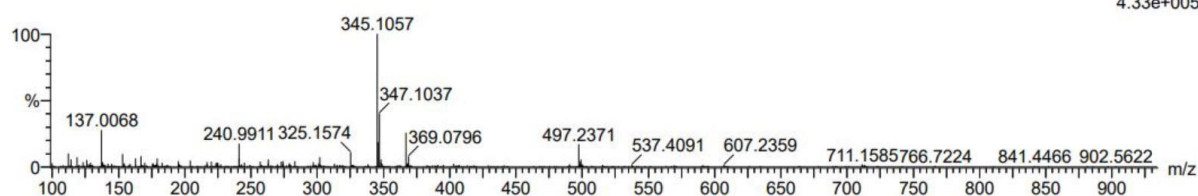

### HRMS 11e

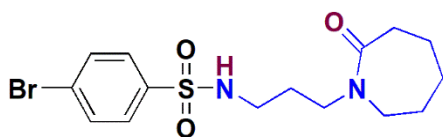

1: TOF MS ES+

5.31e+005

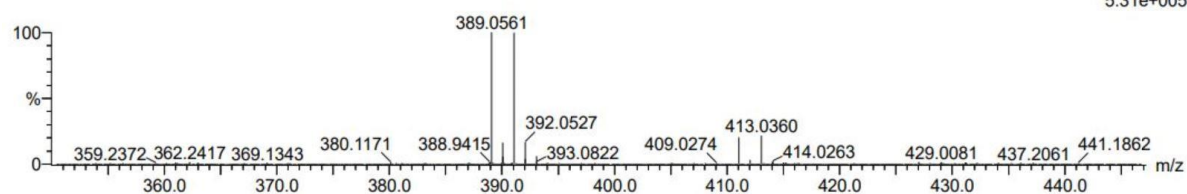

### HRMS 14a

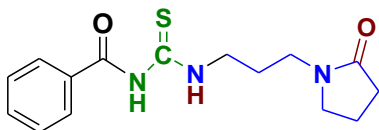



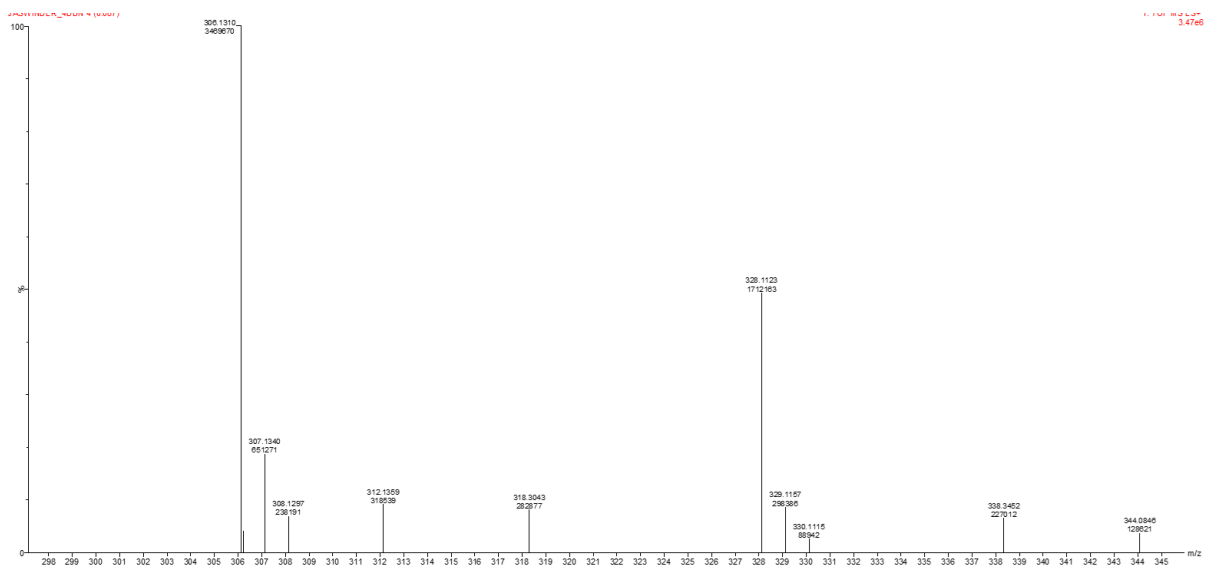

### HRMS 14b

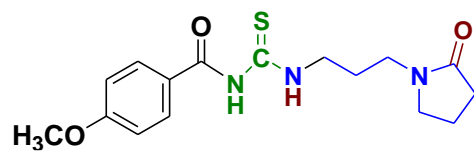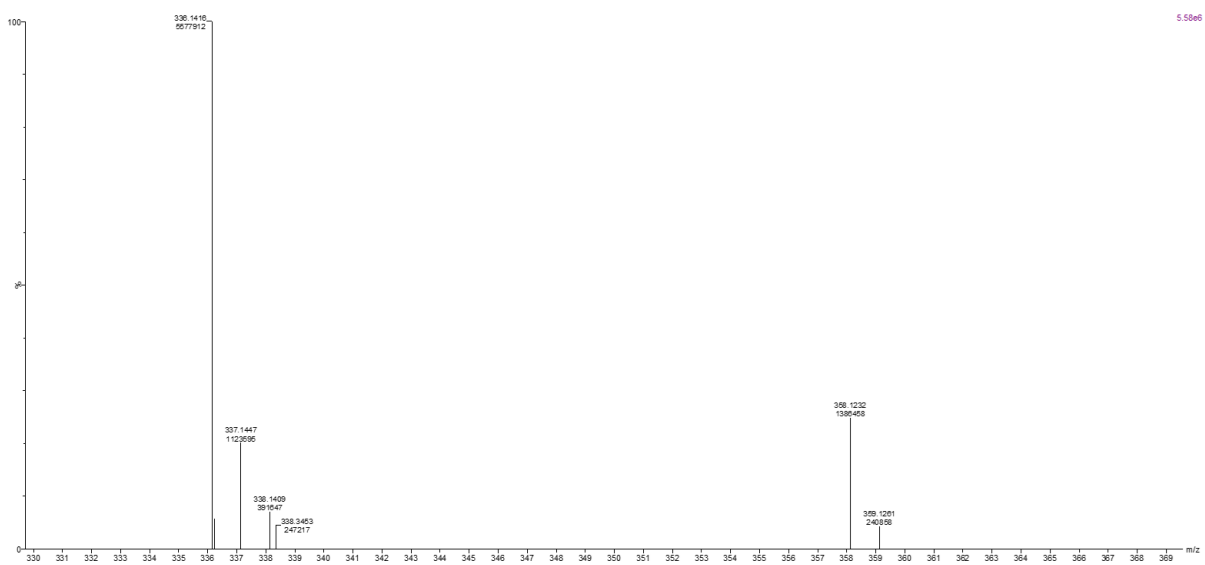

### HRMS 15a

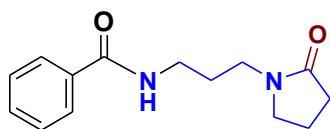

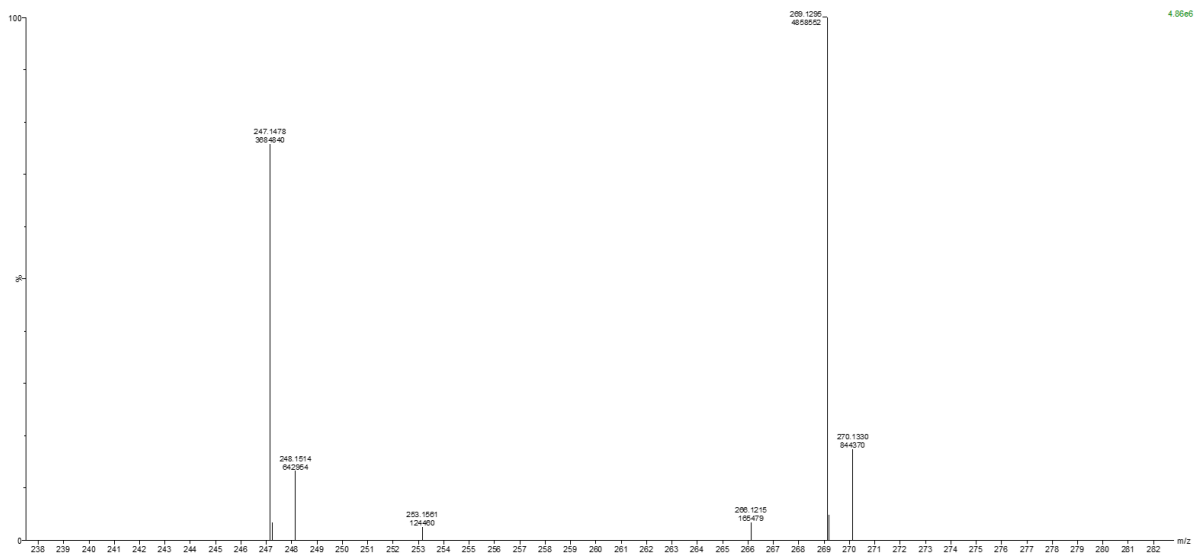

**HRMS 15b**

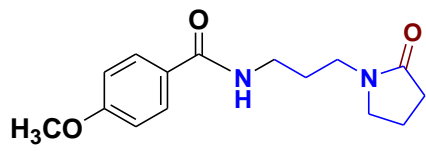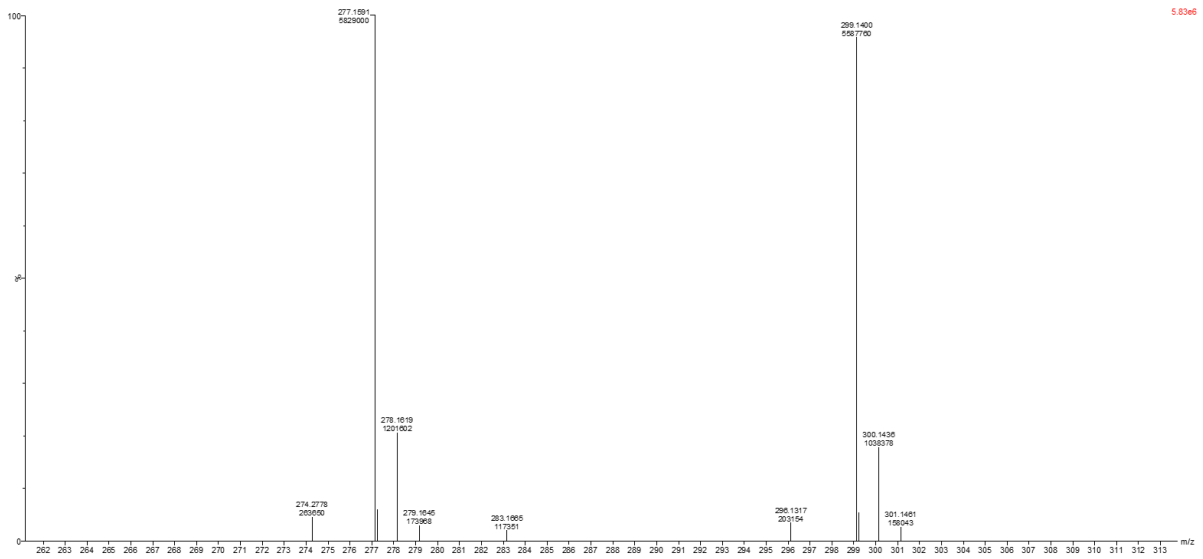

**HRMS 16a**

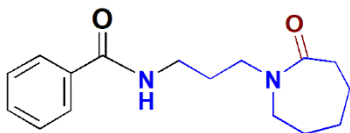

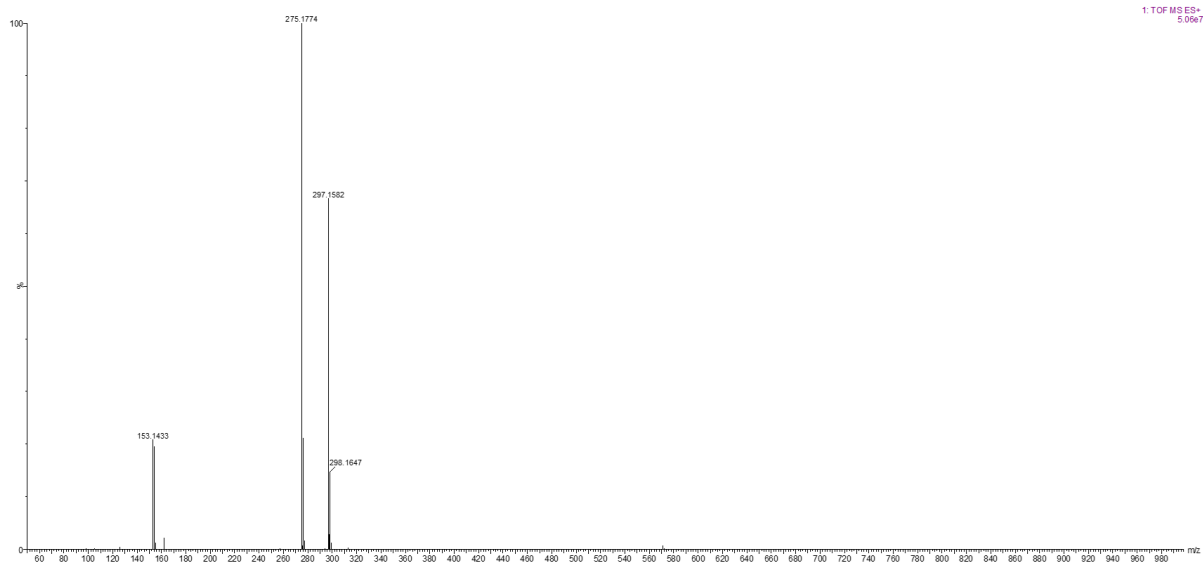

### HRMS 17c

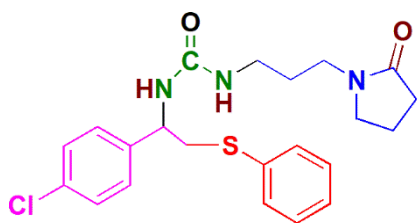

1: TOF MS ES+

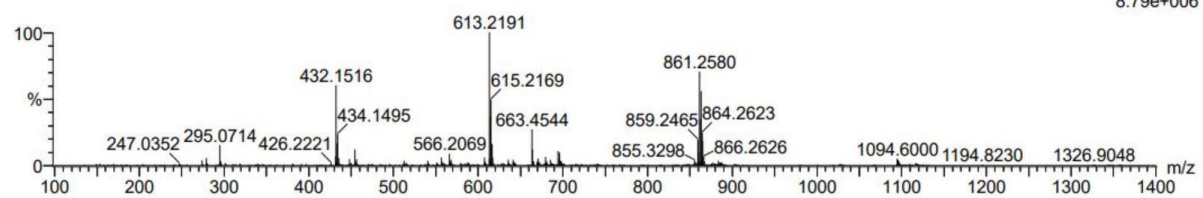

### HRMS 17d

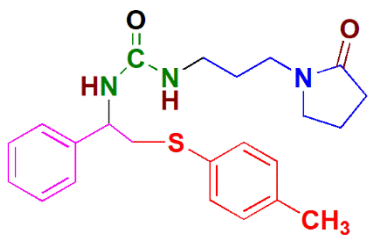

1: TOF MS ES+

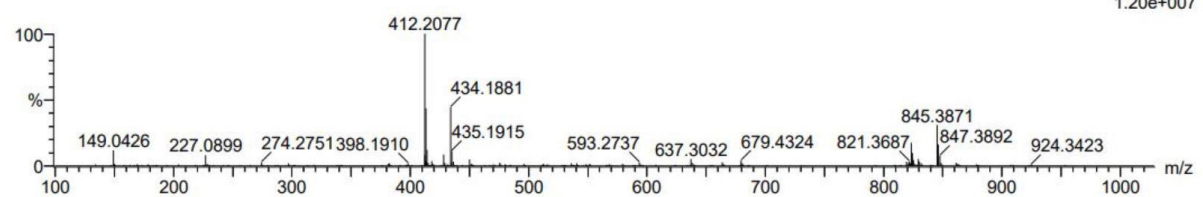

### HRMS 17i

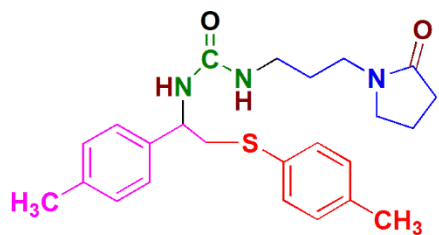

1: TOF MS ES+

2.36e+007

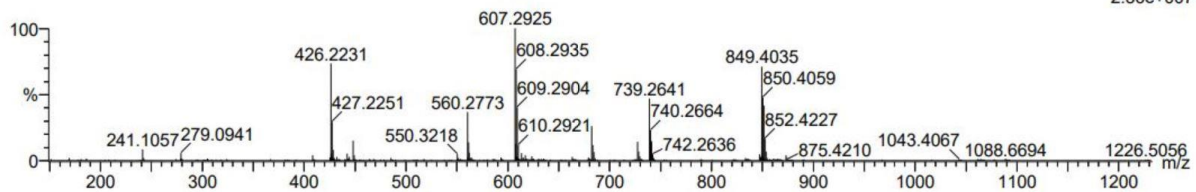

### HRMS 18c

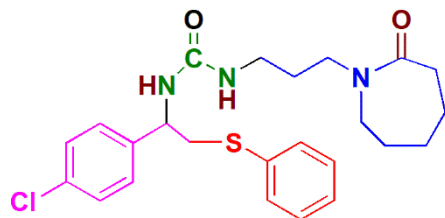

1: TOF MS ES+

1.09e+007

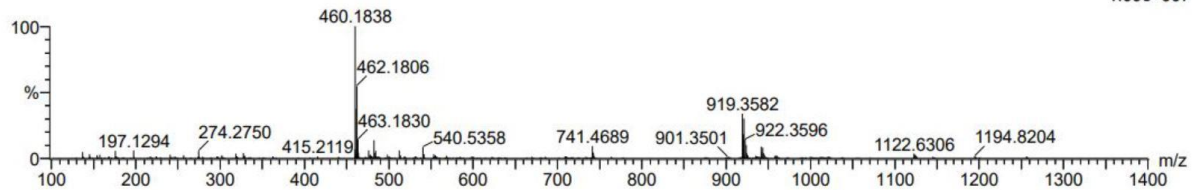

### HRMS 18d

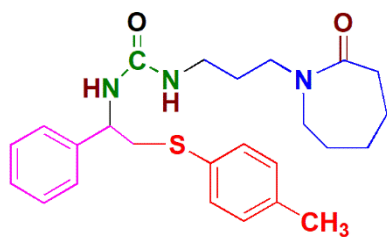

1: TOF MS ES+

9.34e+006

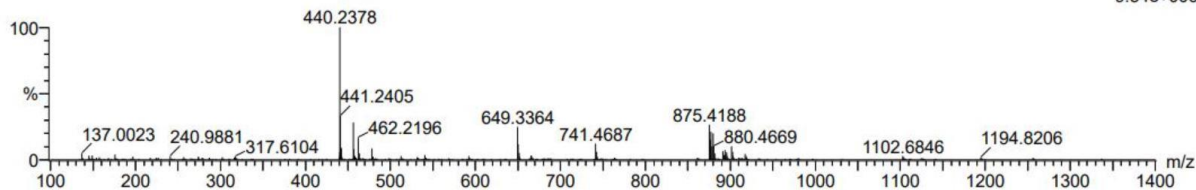

## HRMS 18g

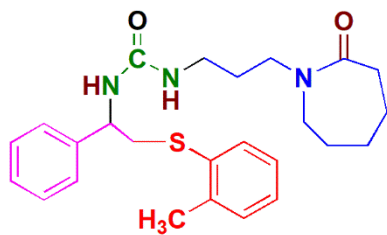

SAIF, PANJAB UNIVERSITY CHANDIGARH

PANKAJ UIT 5 (0.120) Cm (4:12)

SYNAPT-XS#DBA064

30-Jun-2022  
16:18:11  
1: TOF MS ES+  
7.1667

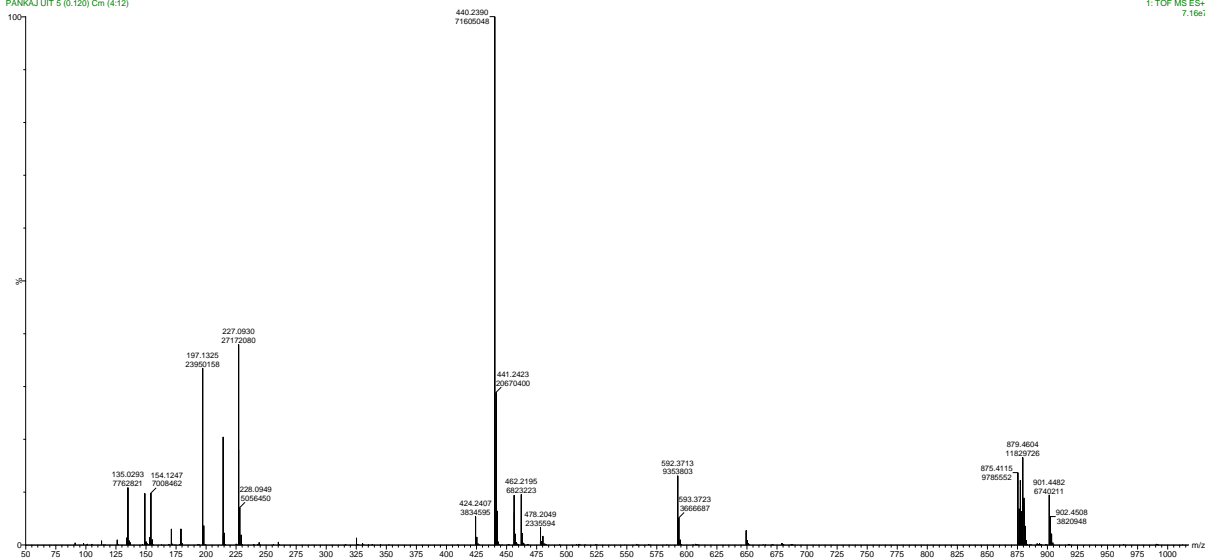

## HRMS TEMPO-Adduct 20

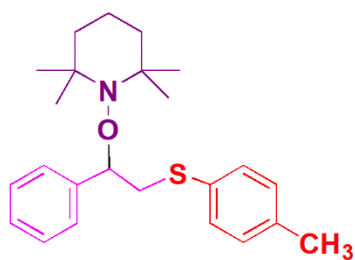

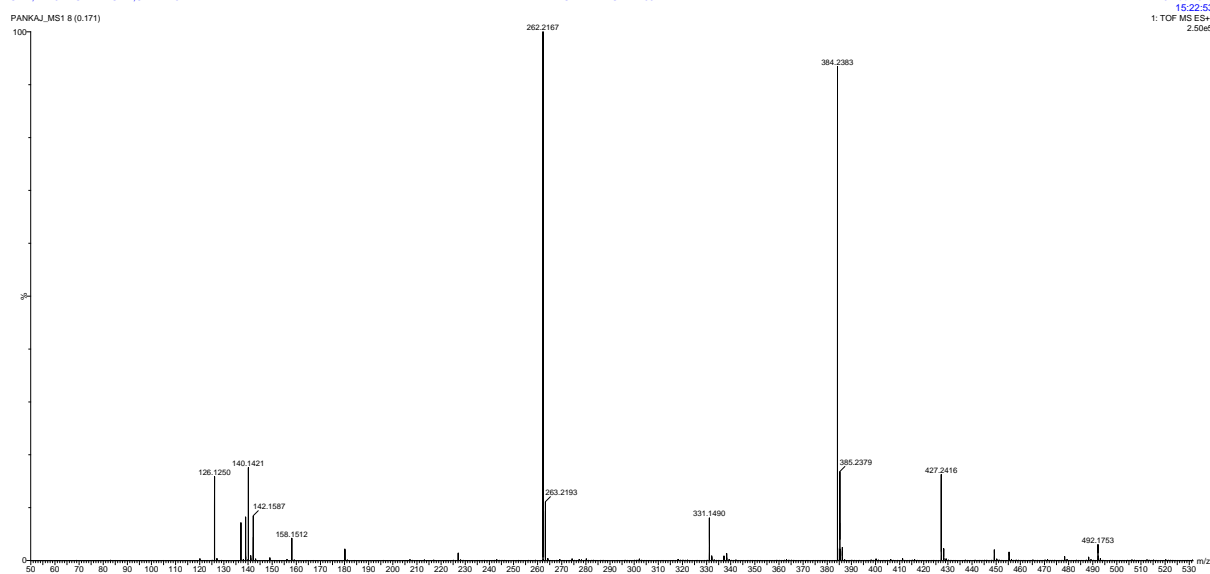

## References:

1. a) H. Tian, J. Yu, H. Yang, C. Zhu and H. Fu. *Adv. Synth. Catal.*, 2016, **358**, 1794. b) L. Qi, S. Liu and L. Xiao. *RSC adv.*, 2020,**10**, 33450 c) C. Xu, Z. He, X. Kang and Q. Zeng. *Green Chem.*, 2021, **23**, 7544.
2. J. Chen, K. Natte. X. F. Wu. *Tetrahedron lett.*, 2015, **56**, 342.
3. Y. Zheng, F. L. Qing, Y. Huang. and X. H. Xu. *Adv. Synth. Catal.*, 2016, **358**, 3477.
